# Supplementary material for: The structure of phosphatidylinositol remodeling MBOAT7 reveals its catalytic mechanism and enables inhibitor identification
Source: Springer Nature journal article supplement (doi:10.1038/s41467-023-38932-5), 2023-06-14
Supplement: MOESM3 [file 41467_2023_38932_MOESM3_ESM.pdf › 41467_2023_38932_MOESM3_ESM.pdf]

### **Description of Additional Supplementary Files**

Supplementary Data 1: the primers used in this study.
