# Supplementary material for: The structure of phosphatidylinositol remodeling MBOAT7 reveals its catalytic mechanism and enables inhibitor identification
Source: Nat Commun. 2023 Jun 14;14:3533. doi: 10.1038/s41467-023-38932-5 (PMC10267149; doi:10.1038/s41467-023-38932-5)
Supplement: Supplementary file 4 — Supplementary Dataset 1 [file 41467_2023_38932_MOESM4_ESM.xlsx]

## Sheet: Sheet1
Primers used in this study
#	Gene	Oligo name	Oligo sequence (5' to 3')
518	MBOAT7	518-hM7_Q5_H356A_F	TGCCTACTGGgccGGCCTCCACC
519	MBOAT7	519-hM7_Q5_H356A_R	CTAAGGAGCATTGTCCACG
522	MBOAT7	522-hM7_Q5_R339A_F	CGCGCCAGCGgcgAGCTATGTTC
523	MBOAT7	523-hM7_Q5_R339A_R	CTTTTATAGATGTATTGTGCGAGC
526	MBOAT7	526-hM7_Q5_R318A_F	AGATGGGATGgcgTATTGGAACATG
527	MBOAT7	527-hM7_Q5_R318A_R	CGGACTCGTACACAAAAG
528	MBOAT7	528-hM7_Q5_S352A_F	AATGCTCCTTgctGCCTACTGGCACG
529	MBOAT7	529-hM7_Q5_S352A_R	GTCCACGCACTCCTAAGA
532	MBOAT7	532-hM7_Q5_LWLAL_INS_F	cgctcttCTCTTCGGACTTCTCTTCTTGC
533	MBOAT7	533-hM7_Q5_LWLAL_INS_R	agccacaaCCTGCGCAACAGAGGTCT
515	MBOAT7	515-hM7_Q5_N321A_F	GAGGTATTGGgccATGACTGTACAATGG
516	MBOAT7	516-hM7_Q5_N321A/L_R	ATCCCATCTCGGACTCGT
631	MBOAT7	631-hM7_Q5_Y8A_F	AGAATGGACAgcCTTGGTTGTCCTCTTGATTTC
632	MBOAT7	632-hM7_Q5_Y8A_R	TCCGGTGACATGTCGACG
633	MBOAT7	633-hM7_Q5_R87A_F	TCTTTTTTTTgcgGCTTTGAGCCTTC
634	MBOAT7	634-hM7_Q5_R87A_R	AGGTAACTAAACGTCCAG
635	MBOAT7	635-hM7_Q5_N102A_F	TCCCTTTACTgccGCGGTCCAGC
636	MBOAT7	636-hM7_Q5_N102A_R	GTCGGAGTTGGCAGTCCG
637	MBOAT7	637-hM7_Q5_R244A_F	CTTTCGCATGgcaTTTTACGTAGC
638	MBOAT7	638-hM7_Q5_R244A_R	GCGAAAAACACAGGAATC
639	MBOAT7	639-hM7_Q5_Y362A_F	CCACCCAGGCgctTATCTTTCATTTCTCACAATACCGCTG
640	MBOAT7	640-hM7_Q5_Y362A_R	AGGCCGTGCCAGTAGGCA
641	MBOAT7	641-hM7_Q5_Q325A_F	CATGACTGTAgcaTGGTGGCTCG
642	MBOAT7	642-hM7_Q5_Q325A_R	TTCCAATACCTCATCCCATC
643	MBOAT7	643-hM7_Q5_W320A_R	GATGAGGTATgcgAACATGACTGTACAATG
644	MBOAT7	644-hM7_Q5_W320A_F	CCATCTCGGACTCGTACA
647	MBOAT7	647-hM7_Q5_P197L_F	AGGGCGTGGCtCGCTCCTCTC
648	MBOAT7	648-hM7_Q5_P197L_R	GCGCAACAGAGGTCTGAGTGAGG
649	MBOAT7	649-hM7_Q5_P199L_F	TGGCCCGCTCtTCTCTTCGGAC
650	MBOAT7	650-hM7_Q5_P199L_R	CGCCCTGCGCAACAGAGG
737	MBOAT1	737-hM1_Q5_M5-loop_F	cgatatcaagtggacaatgccacattgtgttctgACTCAGAAGATCACAACC
738	MBOAT1	738-hM1_Q5_M5-loop_R	tagttgccggtggcagtgtaatagtatccagccagAAGATATCCCATTGCTAC
739	MBOAT1	739-hM1_Q5_M7-loop_F	tccgactccctttactaacgcggtccagctcctgcttACTCAGAAGATCACAACC
740	MBOAT1	740-hM1_Q5_M7-loop_R	gttggcagtccgagaaggctcaaagcccgaaaaaaaagAAGATATCCCATTGCTAC
751	MBOAT5	751-hM5_Q5_M7-loop_F	tccgactccctttactaacgcggtccagctcctgcttACTTTGAAGCTGATTGGTTTG
752	MBOAT5	752-hM5_Q5_M7-loop_R	gttggcagtccgagaaggctcaaagcccgaaaaaaaagAAGGTAGGCCATCTGGAA
757	MBOAT7	757-hM7_Q5_M5-loop_F	cgatatcaagtggacaatgccacattgtgttctgACACTGAAGCTTGTGTCC
758	MBOAT7	758-hM7_Q5_M5-loop_R	tagttgccggtggcagtgtaatagtatccagccagAAGGTAACTAAACGTCCAG
