# Supplementary material for: The structure of phosphatidylinositol remodeling MBOAT7 reveals its catalytic mechanism and enables inhibitor identification
Source: Nat Commun. 2023 Jun 14;14:3533. doi: 10.1038/s41467-023-38932-5 (PMC10267149; doi:10.1038/s41467-023-38932-5)
Supplement: Supplementary file 6 — Source Data [file 41467_2023_38932_MOESM6_ESM.xlsx]

## Sheet: Figure 1
Figure 1b
Uncropped Coomassie Blue Staining gel
Fluorecence activity assay raw data
Application: Tecan i-control				Tecan i-control , 1.12.4.0
Device: infinite 200				Serial number: 812001435				Serial number of connected stacker:
Firmware: V_2.11_04/08_InfiniTe (Apr 4 2008/14.37.11)				MAI, V_2.11_04/08_InfiniTe (Apr 4 2008/14.37.11)
System				HSPH-F7QMJB2
User				HSPH-F7QMJB2\FareseWalther
Plate				Thermo Fisher Scientific-Nunclon 96 Flat Bottom Black Polystyrene Catalog No.: 137101/137103/237105/237107/237108/437111/437112 [NUN96fb.pdfx]
Plate-ID (Stacker)
Shaking (Linear) Duration:				5	s
Shaking (Linear) Amplitude:				1	mm
Label: Label1_Copy1
Mode				Fluorescence Top Reading
Excitation Wavelength				355	nm
Emission Wavelength				460	nm
Excitation Bandwidth				9	nm
Emission Bandwidth				20	nm
Gain				100	Manual
Number of Flashes				15
Integration Time				20	µs
Lag Time				0	µs
Settle Time				15	ms
Part of Plate				B8-D12
	Temperature: 27.4 °C
<>	8	9	10	11	12
B	1813	4614	57136	2477	261
C	1234	3573	54343	1846	264
D	1865	1853	23568	932	261
	no protein Control	BSA	MBOAT7	Boiled MBOAT7	blank
Statistics
Ordinary one-way ANOVA
ANOVA summary
F	15.72
P value	0.001
P value summary	**
Significant diff. among means (P < 0.05)?	Yes
R squared	0.8549
Brown-Forsythe test
F (DFn, DFd)	1.172 (3, 8)
P value	0.3792
P value summary	ns
Are SDs significantly different (P < 0.05)?	No
Bartlett's test
Bartlett's statistic (corrected)
P value
P value summary
Are SDs significantly different (P < 0.05)?
ANOVA table	SS	DF	MS	F (DFn, DFd)	P value
Treatment (between columns)	4121428483	3	1373809494	F (3, 8) = 15.72	P=0.0010
Residual (within columns)	699244663	8	87405583
Total	4820673146	11
Data summary
Number of treatments (columns)	4
Number of values (total)	12
Multiple comparisons
Number of families	1
Number of comparisons per family	3
Alpha	0.05
Dunnett's multiple comparisons test	Mean Diff.	95.00% CI of diff.	Below threshold?	Summary	Adjusted P Value	A-?
No protein control vs. BSA	-1709	-23692 to 20273	No	ns	0.9916	B	BSA
No protein control vs. MBOAT7	-43378	-65361 to -21396	Yes	**	0.0012	C	MBOAT7
No protein control vs. MBOAT7(boiled)	-114.3	-22097 to 21868	No	ns	>0.9999	D	MBOAT7(boiled)
Test details	Mean 1	Mean 2	Mean Diff.	SE of diff.	n1	n2	q	DF
No protein control vs. BSA	1637	3347	-1709	7634	3	3	0.2239	8
No protein control vs. MBOAT7	1637	45016	-43378	7634	3	3	5.683	8
No protein control vs. MBOAT7(boiled)	1637	1752	-114.3	7634	3	3	0.01498	8
Figure 1f
Raw data from fluorescence recordings
	Digitonin added						Proteinase K added										Fluorescence intensity (F/F0)
Interval (s)	0	20	40	60	80	100	120	140	160	180	200	220	240	260	280	300	0	20	40	60	80	100	120	140	160	180	200	220	240	260	280	300
eGFP-MBOAT7 #1	841766	841363	820881	797337	772893	749337	725393	668231	651285	635015	619994	604904	586344	569401	549611	535790	1	0.999521	0.975189	0.947219	0.91818	0.890196	0.861751	0.793844	0.773713	0.754384	0.73654	0.718613	0.696564	0.676436	0.652926	0.636507
eGFP-MBOAT7 #2	2245760	2235886	2207140	2146100	2071485	2005228	1943393	1832562	1765761	1707462	1642394	1598390	1555772	1514114	1466921	1422938	1	0.995603	0.982803	0.955623	0.922398	0.892895	0.865361	0.81601	0.786264	0.760305	0.731331	0.711737	0.69276	0.67421	0.653196	0.633611
eGFP-MBOAT7 #3	1026412	1006763	993585	975943	960140	939490	923843	919671	905313	890062	877865	807868	809718	822589	755860	665055	1	0.980857	0.968018	0.95083	0.935433	0.915315	0.90007	0.896006	0.882017	0.867159	0.855275	0.78708	0.788882	0.801422	0.73641	0.647942
eGFP-MBOAT7 #4	1710246	1694980	1662976	1606372	1554149	1510725	1480503	1348131	1109475	1020838	910484	748650	628453	535775	464013	390288	1	0.991074	0.972361	0.939264	0.908728	0.883338	0.865667	0.788267	0.648722	0.596895	0.53237	0.437744	0.367464	0.313274	0.271314	0.228206
MBOAT7-eGFP #1	2014895	2067314	2097744	2030948	1950646	1930200	1924494	123360	57615	46444	36696	32397	30217	28488	27986	25434	1	1.02602	1.04112	1.00797	0.968113	0.957966	0.955134	0.061224	0.0285945	0.0230503	0.0182124	0.0160788	0.0149968	0.0141387	0.0138896	0.012623
MBOAT7-eGFP #2	1946640	1919925	1886057	1839523	1806857	1766251	1633399	1130947	182281	34794	19748	13163	10564	8727	8459	6585	1	0.986276	0.968878	0.944973	0.928193	0.907333	0.839086	0.580974	0.0936388	0.0178739	0.0101447	0.00676191	0.00542679	0.00448311	0.00434544	0.00338275
MBOAT7-eGFP #3	1845009	1806417	1776341	1676562	1631731	1768589	1780382	41219	16168	11911	10471	8762	7738	6253	5226	4577	1	0.979083	0.962782	0.908701	0.884403	0.95858	0.964972	0.0223408	0.0087631	0.0064558	0.00567531	0.00474903	0.00419402	0.00338914	0.00283251	0.00248075
Emerald-Sec61 #1	1203569	1177677	1149413	1132361	1111758	1098727	1082277	432829	104057	88888	77039	71337	65775	59139	56011	51685	1	0.978487	0.955004	0.940836	0.923718	0.912891	0.899223	0.359621	0.086457	0.0738537	0.0640088	0.0592712	0.05465	0.0491364	0.0465374	0.0429431
Emerald-Sec61 #2	1449927	1383993	1365562	1400650	1480487	1521786	1513081	63942	15574	8962	5955	5514	4637	4345	4088	3045	1	0.954526	0.941814	0.966014	1.02108	1.04956	1.04356	0.0441002	0.0107412	0.006181	0.0041071	0.00380295	0.00319809	0.0029967	0.00281945	0.00210011
Emerald-Sec61 #3	1725468	1730364	1734803	1695052	1659230	1601515	1552443	49521	22986	11644	7291	3140	1830	1918	1320	1837	1	1.00284	1.00541	0.982372	0.961612	0.928163	0.899723	0.0287	0.0133216	0.00674831	0.00422552	0.0018198	0.00106058	0.00111158	0.00076501	0.00106464
mCherry-ER3 #1	1455197	1465462	1482509	1472123	1468308	1466531	1457521	1369096	1363528	1347484	1336129	1326551	1315158	1291603	1281499	1261137	1	1.00705	1.01877	1.01163	1.00901	1.00779	1.0016	0.940832	0.937006	0.92598	0.918177	0.911595	0.903766	0.887579	0.880636	0.866643
mCherry-ER3 #2	2383205	2372142	2388986	2386617	2358866	2350498	2326925	2215818	2192187	2137761	2148769	2119461	2092942	2070089	2050940	2030994	1	0.995358	1.00243	1.00143	0.989787	0.986276	0.976385	0.929764	0.919848	0.897011	0.90163	0.889332	0.878205	0.868616	0.860581	0.852211
mCherry-ER3 #3	1598462	1640612	1641325	1609359	1510952	1434526	1331921	1290988	1268839	1179961	1022362	884018	779844	659497	619027	614920	1	1.02637	1.02682	1.00682	0.945254	0.897441	0.833252	0.807644	0.793787	0.738185	0.639591	0.553043	0.487871	0.412582	0.387264	0.384695
mCherry-ER3 #4	2100431	2139045	2172232	2133137	2122561	2202556	2245722	1968625	2199181	2219429	2051031	1782160	1474281	1187467	964123	702864	1	1.01838	1.03418	1.01557	1.01054	1.04862	1.06917	0.937248	1.04701	1.05665	0.976481	0.848473	0.701895	0.565344	0.459012	0.334628
mCherry-ER3 #5	2758077	2690351	2737035	2729182	2696050	2674212	2607644	2618559	2575279	2582220	2654808	2211357	2221268	2407583	2386208	2085616	1	0.975444	0.992371	0.989523	0.977511	0.969593	0.945457	0.949415	0.933723	0.936239	0.962558	0.801775	0.805368	0.872921	0.865171	0.756185
mCherry-ER3 #6	1358432	1361629	1350899	1331617	1317352	1302766	1288955	1247153	1155329	1141883	1181034	1156196	1138249	1088159	1035231	961822	1	1.00235	0.994455	0.98026	0.969759	0.959022	0.948855	0.918083	0.850487	0.840589	0.86941	0.851125	0.837914	0.80104	0.762078	0.708038

## Sheet: Figure 2; Figure 3
Mutants plotted in Figure 2d
Mutants plotted in Figure 3e
Mutants plotted in Figure 3g
uncropped WB gels and TLC plates
WB quantification
No.	Label	Type	Volume (Int)	Adj. Vol. (Int)	Mean Bkgd. (Int)	Abs. Quant.	Rel. Quant.	# of Pixels	Min. Value (Int)	Max. Value (Int)	Mean Value (Int)	Std. Dev.	Area (mm2)	Lane label
1	U1	Unknown	2301552	1.46993e+06	482.941	N/A	N/A	1722	0	3708	1336.56	795.337	37.7128	BG
2	U2	Unknown	27722844	1.64103e+07	6569.44	N/A	N/A	1722	2284	33468	16099.2	8308.81	37.7128	WT
3	U3	Unknown	35304396	2.05627e+07	8560.8	N/A	N/A	1722	3196	38132	20502	9351.03	37.7128	H356A
4	U4	Unknown	24369316	1.25625e+07	6856.47	N/A	N/A	1722	2916	27412	14151.8	6455.51	37.7128	N321A
5	U5	Unknown	36571564	1.99245e+07	9667.29	N/A	N/A	1722	4144	39988	21237.8	9667.32	37.7128	#
6	U6	Unknown	35825136	1.95063e+07	9476.66	N/A	N/A	1722	4112	41072	20804.4	9828.21	37.7128	R339A
7	U7	Unknown	29356720	1.57863e+07	7880.64	N/A	N/A	1722	3332	36168	17048	9078.35	37.7128	#
8	U8	Unknown	34787556	2.02318e+07	8452.85	N/A	N/A	1722	2080	42232	20201.8	11066.8	37.7128	R318A
9	U9	Unknown	20421960	1.11608e+07	5378.16	N/A	N/A	1722	1732	31256	11859.4	7763.99	37.7128	#
10	U10	Unknown	23527648	1.36143e+07	5131.13	N/A	N/A	1932	1044	29184	12177.9	7425.53	42.3119	#
11	U11	Unknown	667144	-617679	665.022	N/A	N/A	1932	0	3228	345.313	517.496	42.3119	BG-2
Protein amounts adjusted to be equal based on the WB results for activity assays
TLC quantification
Gel name : 20220204_m7-mutant-b1-[Phosphor] (Raw 1-D Image)
Index	Name	Volume	Adj. Vol.	% Adj. Vol.	Concentration
		INT*mm2	INT*mm2
						Lane Label	Subtract background
1	U1	31143.3	31143.3	0.0717815	N/A	GFP
2	U2	2.3604e+06	2.3604e+06	5.44044	N/A	WT	2.32926e+06
3	U3	56516.4	56516.4	0.130263	N/A	H356A	25373.1
4	U4	52986.2	52986.2	0.122127	N/A	N321A	21842.9
5	U5	2.79969e+06	2.79969e+06	6.45294	N/A	#	2.76855e+06
6	U6	2.54223e+06	2.54223e+06	5.85952	N/A	R339A	2.51108e+06
7	U7	2.81074e+06	2.81074e+06	6.4784	N/A	#	2.77959e+06
8	U8	1.05962e+06	1.05962e+06	2.44229	N/A	R318A	1.02848e+06
9	U9	2.33389e+06	2.33389e+06	5.37932	N/A	#	2.30274e+06
10	U10	1.99731e+06	1.99731e+06	4.60355	N/A	WT	1.96616e+06
11	U11	52960	52960	0.122066	N/A	H356A	21816.7
12	U12	61732.2	61732.2	0.142285	N/A	N321A	30588.8
13	U13	2.41604e+06	2.41604e+06	5.56868	N/A	#	2.3849e+06
14	U14	2.28935e+06	2.28935e+06	5.27667	N/A	R339A	2.25821e+06
15	U15	2.68598e+06	2.68598e+06	6.19086	N/A	#	2.65484e+06
16	U16	893959	893959	2.06046	N/A	R318A	862815
17	U17	3.04125e+06	3.04125e+06	7.0097	N/A	#	3.0101e+06
18	U18	21007.6	21007.6	0.04842	N/A	GFP
19	U19	2.31405e+06	2.31405e+06	5.33361	N/A	WT	2.29305e+06
20	U20	44264.1	44264.1	0.102023	N/A	H356A	23256.4
21	U21	48573.7	48573.7	0.111956	N/A	N321A	27566.1
22	U22	2.68155e+06	2.68155e+06	6.18065	N/A	#	2.66055e+06
23	U23	2.42193e+06	2.42193e+06	5.58225	N/A	R339A	2.40092e+06
24	U24	2.81402e+06	2.81402e+06	6.48598	N/A	#	2.79302e+06
25	U25	1.00011e+06	1.00011e+06	2.30513	N/A	R318A	979103
26	U26	2.39882e+06	2.39882e+06	5.529	N/A	#	2.37782e+06
27	U27	2.15614e+06	2.15614e+06	4.96964	N/A	WT	2.13513e+06
Transpose data
			WT	2.32926e+06	1.96616e+06	2.29305e+06	2.13513e+06
			H356A	25373.1	21816.7	23256.4
			N321A	21842.9	30588.8	27566.1
			#	2.76855e+06	2.3849e+06	2.66055e+06
			R339A	2.51108e+06	2.25821e+06	2.40092e+06
			#	2.77959e+06	2.65484e+06	2.79302e+06
			R318A	1.02848e+06	862815	979103
			#	2.30274e+06	3.0101e+06	2.37782e+06
	WT	H356A	N321A	#	R339A	#	R318A	#
	2.32926e+06	25373.1	21842.9	2.26855e+06	2.51108e+06	2.27959e+06	1.02848e+06	2.30274e+06
	2.46616e+06	21816.7	30588.8	2.3849e+06	2.25821e+06	2.65484e+06	862815	2.3101e+06
	2.29305e+06	23256.4	27566.1	2.66055e+06	2.40092e+06	2.39302e+06	979103	2.37782e+06
	2.13513e+06
Normalized to WT (%)
	WT	H356A	N321A	#	R339A	#	R318A	#
	101.013	1.10036	0.947261	98.3801	108.898	98.8591	44.602	99.863
	106.95	0.946126	1.32655	103.426	97.9317	115.132	37.4177	100.182
	99.4425	1.00856	1.19546	115.38	104.121	103.778	42.4608	103.119
	92.5944
uncropped WB gels and TLC plates
								# Lanes not revelent to this study
WB quantification
No.	Label	Type	Volume (Int)	Adj. Vol. (Int)	Mean Bkgd. (Int)	Abs. Quant.	Rel. Quant.	# of Pixels	Min. Value (Int)	Max. Value (Int)	Mean Value (Int)	Std. Dev.	Area (mm2)	Lane Labels
1	U1	Unknown	30804328	1.55555e+07	12814.1	N/A	N/A	1190	4516	45356	25886	9014.47	22.1705	WT
2	U2	Unknown	20921860	1.08042e+07	8502.25	N/A	N/A	1190	3472	31848	17581.4	6946.33	22.1705	S352A
3	U3	Unknown	11876764	6.57429e+06	4455.86	N/A	N/A	1190	412	22708	9980.47	5352.14	22.1705	LWLAL
4	U4	Unknown	2990612	1.0129e+06	1661.94	N/A	N/A	1190	48	6424	2513.12	1233.43	22.1705	#
5	U5	Unknown	7536276	4.63455e+06	2438.42	N/A	N/A	1190	488	16136	6333.01	3733.22	22.1705	Y362A
6	U6	Unknown	4779844	2.56815e+06	1858.56	N/A	N/A	1190	312	10868	4016.68	2188.19	22.1705	Q325A
7	U7	Unknown	6430888	4.31272e+06	1779.97	N/A	N/A	1190	232	13484	5404.11	3105.5	22.1705	R87A
8	U8	Unknown	207468	-55739.9	221.183	N/A	N/A	1190	0	1276	174.343	243.63	22.1705	BG
Protein amounts adjusted to be equal based on the WB results for activity assays
TLC quantification
Gel name : 20220206_m7-mutant-b2-[Phosphor] (Raw 1-D Image)
Index	Name	Volume	Adj. Vol.	% Adj. Vol.	Concentration
		INT*mm2	INT*mm2
						Lane Labels
1	U1	27800.5	27800.5	0.20261	N/A	GFP
2	U2	2.54005e+06	2.54005e+06	18.5118	N/A	WT
3	U3	420520	420520	3.06475	N/A	S352A
4	U4	486760	486760	3.5475	N/A	LWLAL
5	U5	310651	310651	2.26402	N/A	#
6	U6	126659	126659	0.923087	N/A	Y362A
7	U7	386980	386980	2.82031	N/A	Q325A
8	U8	110749	110749	0.807138	N/A	R87A
9	U9	2.63149e+06	2.63149e+06	19.1783	N/A	WT
10	U10	443801	443801	3.23442	N/A	S352A
11	U11	603272	603272	4.39664	N/A	LWLAL
12	U12	321863	321863	2.34573	N/A	#
13	U13	129685	129685	0.945143	N/A	Y362A
14	U14	386471	386471	2.8166	N/A	Q325A
15	U15	110410	110410	0.804665	N/A	R87A
16	U16	18517.7	18517.7	0.134957	N/A	GFP
17	U17	2.6817e+06	2.6817e+06	19.5442	N/A	WT
18	U18	418378	418378	3.04913	N/A	S352A
19	U19	561779	561779	4.09424	N/A	LWLAL
20	U20	365736	365736	2.66548	N/A	#
21	U21	131936	131936	0.96155	N/A	Y362A
22	U22	385537	385537	2.80979	N/A	Q325A
23	U23	120461	120461	0.877922	N/A	R87A
After background subtraction, Nomalize activity to WT (%)
WT	S352A	LWLAL	Y362A	Q325A	R87A
96.8842	15.1451	17.6997	3.81244	13.8517	3.19889
100.411	16.043	22.1929	3.92915	13.8321	3.18581
102.705	15.4205	20.9508	4.37396	14.154	3.93144
uncropped WB gels and TLC plates
WB quantification
No.	Label	Type	Volume (Int)	Adj. Vol. (Int)	Mean Bkgd. (Int)	Abs. Quant.	Rel. Quant.	# of Pixels	Min. Value (Int)	Max. Value (Int)	Mean Value (Int)	Std. Dev.	Area (mm2)	Lane Labels
1	U1	Unknown	36601152	2.14122e+07	10621.7	N/A	N/A	1430	0	47252	25595.2	12657.7	24.4456	WT
2	U2	Unknown	31250960	1.69439e+07	10004.9	N/A	N/A	1430	1452	40564	21853.8	9665.15	24.4456	Y341A
3	U3	Unknown	31844256	2.02545e+07	8104.75	N/A	N/A	1430	672	45196	22268.7	11140.7	24.4456	N102A
4	U4	Unknown	19370212	1.42735e+07	3564.12	N/A	N/A	1430	0	33556	13545.6	8116.91	24.4456	R224A
5	U5	Unknown	24911948	1.84939e+07	4488.14	N/A	N/A	1430	0	39132	17420.9	10947.5	24.4456	Q325A
6	U6	Unknown	18562808	1.53506e+07	2246.27	N/A	N/A	1430	0	35456	12981	9903.89	24.4456	W320A
7	U7	Unknown	24936380	1.93143e+07	3931.49	N/A	N/A	1430	0	44940	17438	12329.1	24.4456	Y333A
8	U8	Unknown	28789280	2.27117e+07	4250.07	N/A	N/A	1430	0	48804	20132.4	12685.4	24.4456	#
9	U9	Unknown	15735660	1.42654e+07	1028.14	N/A	N/A	1430	0	37744	11004	10325	24.4456	#
10	U10	Unknown	0	0	0	N/A	N/A	1430	0	0	0	0	24.4456	BG
Protein amounts adjusted to be equal based on the WB results for activity assays
TLC quantification
Gel name : 220214_M7-mutant_batch3-[Phosphor] (Raw 1-D Image)
Index	Name	Volume	Adj. Vol.	% Adj. Vol.	Concentration
		INT*mm2	INT*mm2
						Lane Labels
1	U1	310054	310054	0.504964	N/A	GFP
2	U2	6.35796e+06	6.35796e+06	10.3548	N/A	WT
3	U3	3.15954e+06	3.15954e+06	5.14572	N/A	Y341A
4	U4	1.95044e+06	1.95044e+06	3.17656	N/A	N102A
5	U5	1.62004e+06	1.62004e+06	2.63845	N/A	R224A
6	U6	2.70673e+06	2.70673e+06	4.40827	N/A	Q325A
7	U7	737487	737487	1.2011	N/A	W320A
8	U8	3.82433e+06	3.82433e+06	6.22843	N/A	Y333A
9	U9	5.98173e+06	5.98173e+06	9.74204	N/A	WT
10	U10	2.76385e+06	2.76385e+06	4.5013	N/A	Y341A
11	U11	2.02621e+06	2.02621e+06	3.29995	N/A	N102A
12	U12	1.66578e+06	1.66578e+06	2.71294	N/A	R224A
13	U13	2.95242e+06	2.95242e+06	4.8084	N/A	Q325A
14	U14	627510	627510	1.02198	N/A	W320A
15	U15	4.04037e+06	4.04037e+06	6.58028	N/A	Y333A
16	U16	377528	377528	0.614853	N/A	GFP
17	U17	5.77795e+06	5.77795e+06	9.41016	N/A	WT
18	U18	3.01786e+06	3.01786e+06	4.91498	N/A	Y341A
19	U19	2.25712e+06	2.25712e+06	3.67602	N/A	N102A
20	U20	2.01791e+06	2.01791e+06	3.28643	N/A	R224A
21	U21	2.71161e+06	2.71161e+06	4.41622	N/A	Q325A
22	U22	621538	621538	1.01226	N/A	W320A
23	U23	3.89524e+06	3.89524e+06	6.34391	N/A	Y333A
uncropped WB gels and TLC plates
WB quantification
No.	No.	Label	Type	Volume (Int)	Adj. Vol. (Int)	Mean Bkgd. (Int)	Abs. Quant.	Rel. Quant.	# of Pixels	Min. Value (Int)	Max. Value (Int)	Mean Value (Int)	Std. Dev.	Area (mm2)	Lane Labels
1	1	U1	Unknown	5362896	2.7082e+06	2469.49	N/A	N/A	1075	0	13820	4988.74	3208.61	20.8802	Y8A
2	2	U2	Unknown	13099176	1.00942e+07	2795.29	N/A	N/A	1075	0	28700	12185.3	7472.52	20.8802	P197L
3	3	U3	Unknown	13447868	1.04418e+07	2796.37	N/A	N/A	1075	0	28400	12509.6	7767.44	20.8802	P199L
4	4	U4	Unknown	988508	180784	751.371	N/A	N/A	1075	0	3992	919.542	969.873	20.8802	#
5	5	U5	Unknown	18092084	1.12808e+07	6336.11	N/A	N/A	1075	868	30808	16829.8	8089.61	20.8802	WT
	6	U6	Unknown	4304	-1101.71	5.02857	N/A	N/A	1075	0	632	4.00372	35.7727	20.8802	BG
Protein amounts adjusted to be equal based on the WB results for activity assays
TLC quantification
Gel name : 2022-03-21_m7-mutant-[Phosphor] (Raw 1-D Image)
Index	Name	Volume	Adj. Vol.	% Adj. Vol.	Concentration
		INT*mm2	INT*mm2
1	U1	366580	366580	0.283215	N/A	B/G
2	U2	8.57595e+06	8.57595e+06	6.62567	N/A	WT
3	U3	8.7894e+06	8.7894e+06	6.79058	N/A	WT
4	U4	8.54712e+06	8.54712e+06	6.6034	N/A	WT
5	U5	1.90977e+06	1.90977e+06	1.47546	N/A	Y8A
6	U6	1.54894e+06	1.54894e+06	1.19669	N/A	Y8A
7	U7	1.41682e+06	1.41682e+06	1.09462	N/A	Y8A
8	U8	4.89682e+06	4.89682e+06	3.78322	N/A	P197L
9	U9	4.82125e+06	4.82125e+06	3.72483	N/A	P197L
10	U10	4.76988e+06	4.76988e+06	3.68515	N/A	P197L
11	U11	3.95175e+06	3.95175e+06	3.05307	N/A	P199L
12	U12	3.18188e+06	3.18188e+06	2.45828	N/A	P199L
13	U13	3.53255e+06	3.53255e+06	2.7292	N/A	P199L
cansolidate data plotted in Figure 2d
WT	R318A	W320A	N321A	Q325A	Y333A	R339A	Y341	S352A	H356A
101.013	44.602	7.49007	0.947261	41.9978	61.582	108.898	49.9325	15.1451	1.10036
106.95	37.4177	5.56289	1.32655	46.3031	65.3676	97.9317	42.9988	16.043	0.946126
99.4425	42.4608	4.27589	1.19546	40.901	61.6421	104.121	46.2674	15.4205	1.00856
92.5944
Statistics
Ordinary one-way ANOVA
ANOVA summary
F	397.4
P value	<0.0001
P value summary	****
Significant diff. among means (P < 0.05)?	Yes
R squared	0.9942
Brown-Forsythe test
F (DFn, DFd)	1.294 (9, 21)
P value	0.297
P value summary	ns
Are SDs significantly different (P < 0.05)?	No
Bartlett's test
Bartlett's statistic (corrected)
P value
P value summary
Are SDs significantly different (P < 0.05)?
ANOVA table	SS	DF	MS	F (DFn, DFd)	P value
Treatment (between columns)	42187	9	4687	F (9, 21) = 397.4	P<0.0001
Residual (within columns)	247.7	21	11.79
Total	42435	30
Data summary
Number of treatments (columns)	10
Number of values (total)	31
Multiple comparisons
Dunnett's multiple comparisons test	Mean Diff.	95.00% CI of diff.	Below threshold?	Summary	Adjusted P Value	A-?
WT vs. R318A	58.51	50.73 to 66.29	Yes	****	<0.0001	B	R318A
WT vs. W320A	94.22	86.44 to 102.0	Yes	****	<0.0001	C	W320A
WT vs. N321A	98.84	91.06 to 106.6	Yes	****	<0.0001	D	N321A
WT vs. Q325A	56.93	49.15 to 64.71	Yes	****	<0.0001	E	Q325A
WT vs. Y333A	37.14	29.36 to 44.92	Yes	****	<0.0001	F	Y333A
WT vs. R339A	-3.65	-11.43 to 4.130	No	ns	0.6945	G	R339A
WT vs. Y341	53.6	45.82 to 61.38	Yes	****	<0.0001	H	Y341
WT vs. S352A	84.46	76.68 to 92.24	Yes	****	<0.0001	I	S352A
WT vs. H356A	98.98	91.20 to 106.8	Yes	****	<0.0001	J	H356A
Test details	Mean 1	Mean 2	Mean Diff.	SE of diff.	n1	n2	q	DF
WT vs. R318A	100	41.49	58.51	2.623	4	3	22.31	21
WT vs. W320A	100	5.776	94.22	2.623	4	3	35.92	21
WT vs. N321A	100	1.156	98.84	2.623	4	3	37.68	21
WT vs. Q325A	100	43.07	56.93	2.623	4	3	21.71	21
WT vs. Y333A	100	62.86	37.14	2.623	4	3	14.16	21
WT vs. R339A	100	103.7	-3.65	2.623	4	3	1.392	21
WT vs. Y341	100	46.4	53.6	2.623	4	3	20.44	21
WT vs. S352A	100	15.54	84.46	2.623	4	3	32.2	21
WT vs. H356A	100	1.018	98.98	2.623	4	3	37.74	21
cansolidate data plotted in Figure 3e
WT	Y8A	R87A	N102A	R224A	Y362A
96.8842	18.658	3.19889	28.7451	10.9081	3.81244
100.411	14.2954	3.18581	30.0728	11.3405	3.92915
102.705	12.698	3.93144	32.9367	13.3904	4.37396
Statistics
Ordinary one-way ANOVA
ANOVA summary
F	988.3
P value	<0.0001
P value summary	****
Significant diff. among means (P < 0.05)?	Yes
R squared	0.9976
Brown-Forsythe test
F (DFn, DFd)	1.004 (5, 12)
P value	0.4564
P value summary	ns
Are SDs significantly different (P < 0.05)?	No
Bartlett's test
Bartlett's statistic (corrected)
P value
P value summary
Are SDs significantly different (P < 0.05)?
ANOVA table	SS	DF	MS	F (DFn, DFd)	P value
Treatment (between columns)	20370	5	4074	F (5, 12) = 988.3	P<0.0001
Residual (within columns)	49.46	12	4.122
Total	20420	17
Data summary
Number of treatments (columns)	6
Number of values (total)	18
Multiple comparisons
Number of families	1
Number of comparisons per family	5
Alpha	0.05
Dunnett's multiple comparisons test	Mean Diff.	95.00% CI of diff.	Below threshold?	Summary	Adjusted P Value	A-?
WT vs. Y8A	84.78	79.97 to 89.59	Yes	****	<0.0001	B	Y8A
WT vs. R87A	96.56	91.75 to 101.4	Yes	****	<0.0001	C	R87A
WT vs. N102A	69.42	64.61 to 74.22	Yes	****	<0.0001	D	N102A
WT vs. R224A	88.12	83.31 to 92.93	Yes	****	<0.0001	E	R224A
WT vs. Y362A	95.96	91.15 to 100.8	Yes	****	<0.0001	F	Y362A
Test details	Mean 1	Mean 2	Mean Diff.	SE of diff.	n1	n2	q	DF
WT vs. Y8A	100	15.22	84.78	1.658	3	3	51.14	12
WT vs. R87A	100	3.439	96.56	1.658	3	3	58.25	12
WT vs. N102A	100	30.58	69.42	1.658	3	3	41.87	12
WT vs. R224A	100	11.88	88.12	1.658	3	3	53.16	12
WT vs. Y362A	100	4.039	95.96	1.658	3	3	57.89	12
consolidate data plotted in Figure 3g
WT	P197L	P199L	LWLAL
96.8842	54.7732	43.3468	17.6997
100.411	53.8595	34.0386	22.1929
102.705	53.2384	38.2784	20.9508
Statistics
Ordinary one-way ANOVA
ANOVA summary
F	384.5
P value	<0.0001
P value summary	****
Significant diff. among means (P < 0.05)?	Yes
R squared	0.9931
Brown-Forsythe test
F (DFn, DFd)	1.026 (3, 8)
P value	0.4312
P value summary	ns
Are SDs significantly different (P < 0.05)?	No
Bartlett's test
Bartlett's statistic (corrected)
P value
P value summary
Are SDs significantly different (P < 0.05)?
ANOVA table	SS	DF	MS	F (DFn, DFd)	P value
Treatment (between columns)	10467	3	3489	F (3, 8) = 384.5	P<0.0001
Residual (within columns)	72.59	8	9.074
Total	10539	11
Data summary
Number of treatments (columns)	4
Number of values (total)	12
Multiple comparisons
Number of families	1
Number of comparisons per family	3
Alpha	0.05
Dunnett's multiple comparisons test	Mean Diff.	95.00% CI of diff.	Below threshold?	Summary	Adjusted P Value	A-?
WT vs. P197L	46.04	38.96 to 53.13	Yes	****	<0.0001	B	P197L
WT vs. P199L	61.45	54.36 to 68.53	Yes	****	<0.0001	C	P199L
WT vs. LWLAL	79.72	72.64 to 86.80	Yes	****	<0.0001	D	LWLAL
Test details	Mean 1	Mean 2	Mean Diff.	SE of diff.	n1	n2	q	DF
WT vs. P197L	100	53.96	46.04	2.459	3	3	18.72	8
WT vs. P199L	100	38.55	61.45	2.459	3	3	24.98	8
WT vs. LWLAL	100	20.28	79.72	2.459	3	3	32.41	8

## Sheet: Figure 4
Figure 4d
uncropped WB gels and TLC plates
Figure 4e
uncropped WB gels and TLC plates

## Sheet: Figure 5
Figure 5a
Compound summary from the VirtualFlow report
(Command: ./Sevenin-_report.sh -c workflow)
Number	of	ligands	screened	with	binding	affinity	between	0	and	inf	kcal/mole:	0
Number	of	ligands	screened	with	binding	affinity	between	-0.1	and	-5	kcal/mole:	0
Number	of	ligands	screened	with	binding	affinity	between	-5	and	-5.5	kcal/mole:	1
Number	of	ligands	screened	with	binding	affinity	between	-5.5	and	-6	kcal/mole:	23
Number	of	ligands	screened	with	binding	affinity	between	-6	and	-6.5	kcal/mole:	429
Number	of	ligands	screened	with	binding	affinity	between	-6.5	and	-7	kcal/mole:	4933
Number	of	ligands	screened	with	binding	affinity	between	-7	and	-7.5	kcal/mole:	35151
Number	of	ligands	screened	with	binding	affinity	between	-7.5	and	-8	kcal/mole:	161758
Number	of	ligands	screened	with	binding	affinity	between	-8	and	-8.5	kcal/mole:	496071
Number	of	ligands	screened	with	binding	affinity	between	-8.5	and	-9	kcal/mole:	981077
Number	of	ligands	screened	with	binding	affinity	between	-9	and	-9.5	kcal/mole:	1256100
Number	of	ligands	screened	with	binding	affinity	between	-9.5	and	-10	kcal/mole:	1065353
Number	of	ligands	screened	with	binding	affinity	between	-10	and	-10.5	kcal/mole:	600067
Number	of	ligands	screened	with	binding	affinity	between	-10.5	and	-11	kcal/mole:	219041
Number	of	ligands	screened	with	binding	affinity	between	-11	and	-11.5	kcal/mole:	52501
Number	of	ligands	screened	with	binding	affinity	between	-11.5	and	-12	kcal/mole:	8228
Number	of	ligands	screened	with	binding	affinity	between	-12	and	-12.5	kcal/mole:	877
Number	of	ligands	screened	with	binding	affinity	between	-12.5	and	-13	kcal/mole:	64
Number	of	ligands	screened	with	binding	affinity	between	-13	and	-13.5	kcal/mole:	7
Number	of	ligands	screened	with	binding	affinity	between	-13.5	and	-14	kcal/mole:	3
Number	of	ligands	screened	with	binding	affinity	between	-14	and	-14.5	kcal/mole:	1
Number	of	ligands	screened	with	binding	affinity	between	-14.5	and	-15	kcal/mole:	0
Number	of	ligands	screened	with	binding	affinity	between	-15	and	-20	kcal/mole:	0
Number	of	ligands	screened	with	binding	affinity	between	-20	and	negative infinity
Figure 5b
50 µM
TLC quantification
Index	Name	Volume	Adj. Vol.	% Adj. Vol.	Concentration						Index	Name	Volume	Adj. Vol.	% Adj. Vol.	Concentration							Index	Name	Volume	Adj. Vol.	% Adj. Vol.	Concentration
		INT*mm2	INT*mm2										INT*mm2	INT*mm2											INT*mm2	INT*mm2
																													Lane label		Subtract background	Nomalize to WT(%)
						Lane label		Subtract background	Nomalize to WT(%)								Lane label		Subtract background	Nomalize to WT(%)			1	U1	22291.9	22291.9	0.0843082	N/A	NC	22291.9
1	U1	56135.8	56135.8	0.160328	N/A	NC	56135.8				18	U18	61923	61923	0.176857	N/A	NC	61923					2	U2	1.24017e+06	1.24017e+06	4.69033	N/A	WT	1.24017e+06	1.21788e+06	100
2	U2	1.75018e+06	1.75018e+06	4.99864	N/A	WT	1.75018e+06	1.69404e+06	100		19	U19	1.74947e+06	1.74947e+06	4.99661	N/A	WT	1.74947e+06	1.68754e+06				3	U3	187851	187851	0.710453	N/A	Sevenin-1	187851	165559	13.5941
3	U3	281931	281931	0.805216	N/A	Sevenin-1	281931	225795	13.3288		20	U20	246871	246871	0.705084	N/A	Sevenin-1	246871	184948	10.9596			4	U4	358636	358636	1.35636	N/A	Sevenin-2	358636	336344	27.6173
4	U4	534934	534934	1.52781	N/A	Sevenin-2	534934	478799	28.2637		21	U21	478129	478129	1.36557	N/A	Sevenin-2	478129	416206	24.6634			5	U5	956825	956825	3.61872	N/A	Sevenin-6	956825	934533	76.7347
5	U5	1.07174e+06	1.07174e+06	3.06096	N/A	Sevenin-6	1.07174e+06	1.0156e+06	59.9513		22	U22	1.06921e+06	1.06921e+06	3.05375	N/A	Sevenin-6	1.06921e+06	1.00729e+06	59.6896			6	U6	656794	656794	2.484	N/A	Sevenin-7	656794	634502	52.0991
6	U6	1.01434e+06	1.01434e+06	2.89702	N/A	Sevenin-7	1.01434e+06	958201	56.563		23	U23	1.07567e+06	1.07567e+06	3.07219	N/A	Sevenin-7	1.07567e+06	1.01374e+06	60.0722			7	U7	768893	768893	2.90796	N/A	Sevenin-8	768893	746601	61.3035
7	U7	1.04222e+06	1.04222e+06	2.97666	N/A	Sevenin-8	1.04222e+06	986082	58.2088		24	U24	1.15009e+06	1.15009e+06	3.28476	N/A	Sevenin-8	1.15009e+06	1.08817e+06	64.4826			8	U8	792322	792322	2.99657	N/A	Sevenin-10	792322	770030	63.2273
8	U8	1.05119e+06	1.05119e+06	3.00228	N/A	Sevenin-10	1.05119e+06	995054	58.7385		25	U25	1.15514e+06	1.15514e+06	3.29918	N/A	Sevenin-10	1.15514e+06	1.09322e+06	64.7817			9	U9	957276	957276	3.62043	N/A	Sevenin-13	957276	934984	76.7717
9	U9	1.07417e+06	1.07417e+06	3.06791	N/A	Sevenin-13	1.07417e+06	1.01803e+06	60.0949		26	U26	1.1645e+06	1.1645e+06	3.32589	N/A	Sevenin-13	1.1645e+06	1.10257e+06	65.336			10	U10	655999	655999	2.48099	N/A	Sevenin-16	655999	633707	52.0338
10	U10	877581	877581	2.50644	N/A	Sevenin-16	877581	821445	48.4902		27	U27	864675	864675	2.46958	N/A	Sevenin-16	864675	802752	47.5693			11	U11	989141	989141	3.74094	N/A	Sevenin-19	989141	966849	79.3881
11	U11	1.15672e+06	1.15672e+06	3.30369	N/A	Sevenin-19	1.15672e+06	1.10059e+06	64.9682		28	U28	1.1965e+06	1.1965e+06	3.4173	N/A	Sevenin-19	1.1965e+06	1.13458e+06	67.2325			12	U12	659047	659047	2.49252	N/A	Sevenin-20	659047	636755	52.2841
12	U12	1.01765e+06	1.01765e+06	2.90648	N/A	Sevenin-20	1.01765e+06	961513	56.7585		29	U29	1.04775e+06	1.04775e+06	2.99245	N/A	Sevenin-20	1.04775e+06	985826	58.4179			13	U13	1.09751e+06	1.09751e+06	4.15081	N/A	Sevenin-21	1.09751e+06	1.07522e+06	88.2867
13	U13	1.29064e+06	1.29064e+06	3.68616	N/A	Sevenin-21	1.29064e+06	1.2345e+06	72.873		30	U30	1.22779e+06	1.22779e+06	3.50666	N/A	Sevenin-21	1.22779e+06	1.16587e+06	69.0866			14	U14	1.16082e+06	1.16082e+06	4.39022	N/A	Sevenin-22	1.16082e+06	1.13853e+06	93.4846
14	U14	1.43505e+06	1.43505e+06	4.09861	N/A	Sevenin-22	1.43505e+06	1.37891e+06	81.3977		31	U31	1.35257e+06	1.35257e+06	3.86305	N/A	Sevenin-22	1.35257e+06	1.29065e+06	76.481			15	U15	1.03291e+06	1.03291e+06	3.90646	N/A	DGAT1-in-1	1.03291e+06	1.01062e+06	82.9818
15	U15	769773	769773	2.19853	N/A	T863	769773	713638	42.1263		32	U32	1.0715e+06	1.0715e+06	3.06027	N/A	T863	1.0715e+06	1.00957e+06	59.825			16	U16	628062	628062	2.37533	N/A	T863	628062	605770	49.7399
16	U16	1.90688e+06	1.90688e+06	5.44619	N/A	DGAT1-in-1	1.90688e+06	1.85074e+06	109.25		33	U33	1.7753e+06	1.7753e+06	5.07041	N/A	DGAT1-in-1	1.7753e+06	1.71338e+06	101.531			17	U17	234190	234190	0.885709	N/A	ATR-101	234190	211898	17.399
17	U17	1.00957e+06	1.00957e+06	2.88341	N/A	ATR-101	1.00957e+06	953433	56.2815		34	U34	985289	985289	2.81406	N/A	ATR-101	985289	923366	54.7166
5 µM
Index	Name	Volume	Adj. Vol.	% Adj. Vol.	Concentration						Index	Name	Volume	Adj. Vol.	% Adj. Vol.	Concentration						Index	Name	Volume	Adj. Vol.	% Adj. Vol.	Concentration							Index	Name	Volume	Adj. Vol.	% Adj. Vol.	Concentration
		INT*mm2	INT*mm2										INT*mm2	INT*mm2										INT*mm2	INT*mm2											INT*mm2	INT*mm2
						Lane label		Subtract background	Nomalize to WT(%)								Lane label		Subtract background	Nomalize to WT(%)								Lane label		Subtract background	Nomalize to WT(%)									Lane label		Subtract background	Nomalize to WT(%)
18	U18	15868.8	15868.8	0.060016	N/A	NC	15868.8				1	U1	37720.6	37720.6	0.0845543	N/A	NC	37720.6				18	U18	41457.6	41457.6	0.0929311	N/A	NC	41457.6					1	U1	46174.5	46174.5	0.653249	N/A	NC
19	U19	1.18873e+06	1.18873e+06	4.49579	N/A	WT	1.18873e+06	1.17286e+06	100		2	U2	1.32803e+06	1.32803e+06	2.9769	N/A	WT	1.32803e+06	1.29031e+06	100		19	U19	1.43326e+06	1.43326e+06	3.21278	N/A	WT	1.43326e+06	1.3918e+06	100			2	U2	2.00602e+06	2.00602e+06	28.38	N/A	WT	1.95985e+06	100
20	U20	317653	317653	1.20137	N/A	Sevenin-1	317653	301784	25.7306		3	U3	316596	316596	0.70968	N/A	Sevenin-1	316596	278876	21.6131		20	U20	376079	376079	0.843017	N/A	Sevenin-1	376079	334622	24.0424			3	U3	348454	348454	4.92971	N/A	Conc50	302279	15.4236
21	U21	820196	820196	3.10199	N/A	Sevenin-2	820196	804327	68.5781		4	U4	1.06423e+06	1.06423e+06	2.38558	N/A	Sevenin-2	1.06423e+06	1.02651e+06	79.5556		21	U21	1.11658e+06	1.11658e+06	2.50293	N/A	Sevenin-2	1.11658e+06	1.07513e+06	77.2473			4	U4	410567	410567	5.80845	N/A	Conc50	364392	18.5929
22	U22	1.02535e+06	1.02535e+06	3.87787	N/A	Sevenin-6	1.02535e+06	1.00948e+06	86.0696		5	U5	1.49808e+06	1.49808e+06	3.35808	N/A	Sevenin-6	1.49808e+06	1.46036e+06	113.179		22	U22	1.68709e+06	1.68709e+06	3.78176	N/A	Sevenin-6	1.68709e+06	1.64563e+06	118.238			5	U5	422962	422962	5.98381	N/A	Conc50	376788	19.2253
23	U23	1.05062e+06	1.05062e+06	3.97344	N/A	Sevenin-7	1.05062e+06	1.03475e+06	88.2242		6	U6	1.40689e+06	1.40689e+06	3.15367	N/A	Sevenin-7	1.40689e+06	1.36917e+06	106.112		23	U23	1.41369e+06	1.41369e+06	3.16891	N/A	Sevenin-7	1.41369e+06	1.37223e+06	98.594			6	U6	1.22659e+06	1.22659e+06	17.353	N/A	Conc5	1.18041e+06	60.2297
24	U24	1.15423e+06	1.15423e+06	4.36529	N/A	Sevenin-8	1.15423e+06	1.13836e+06	97.058		7	U7	1.4832e+06	1.4832e+06	3.32472	N/A	Sevenin-8	1.4832e+06	1.44548e+06	112.026		24	U24	1.57662e+06	1.57662e+06	3.53414	N/A	Sevenin-8	1.57662e+06	1.53516e+06	110.3			7	U7	1.33222e+06	1.33222e+06	18.8475	N/A	Conc5	1.28605e+06	65.6198
25	U25	1.1511e+06	1.1511e+06	4.35345	N/A	Sevenin-10	1.1511e+06	1.13523e+06	96.7911		8	U8	1.62336e+06	1.62336e+06	3.63892	N/A	Sevenin-10	1.62336e+06	1.58564e+06	122.889		25	U25	1.58385e+06	1.58385e+06	3.55034	N/A	Sevenin-10	1.58385e+06	1.54239e+06	110.82			8	U8	1.27545e+06	1.27545e+06	18.0442	N/A	Conc5	1.22927e+06	62.7227
26	U26	1.25355e+06	1.25355e+06	4.74094	N/A	Sevenin-13	1.25355e+06	1.23768e+06	105.527		9	U9	1.65998e+06	1.65998e+06	3.721	N/A	Sevenin-13	1.65998e+06	1.62226e+06	125.726		26	U26	1.6247e+06	1.6247e+06	3.64191	N/A	Sevenin-13	1.6247e+06	1.58324e+06	113.755
27	U27	1.153e+06	1.153e+06	4.36067	N/A	Sevenin-16	1.153e+06	1.13714e+06	96.9539		10	U10	1.45004e+06	1.45004e+06	3.2504	N/A	Sevenin-16	1.45004e+06	1.41232e+06	109.456		27	U27	1.52026e+06	1.52026e+06	3.40779	N/A	Sevenin-16	1.52026e+06	1.4788e+06	106.251
28	U28	1.29606e+06	1.29606e+06	4.90169	N/A	Sevenin-19	1.29606e+06	1.28019e+06	109.151		11	U11	1.51834e+06	1.51834e+06	3.40351	N/A	Sevenin-19	1.51834e+06	1.48062e+06	114.749		28	U28	1.67544e+06	1.67544e+06	3.75566	N/A	Sevenin-19	1.67544e+06	1.63398e+06	117.401
29	U29	1.15033e+06	1.15033e+06	4.35056	N/A	Sevenin-20	1.15033e+06	1.13446e+06	96.726		12	U12	1.38228e+06	1.38228e+06	3.0985	N/A	Sevenin-20	1.38228e+06	1.34456e+06	104.204		29	U29	1.58112e+06	1.58112e+06	3.54422	N/A	Sevenin-20	1.58112e+06	1.53966e+06	110.624
30	U30	1.23068e+06	1.23068e+06	4.65443	N/A	Sevenin-21	1.23068e+06	1.21481e+06	103.576		13	U13	1.58349e+06	1.58349e+06	3.54954	N/A	Sevenin-21	1.58349e+06	1.54577e+06	119.798		30	U30	1.82024e+06	1.82024e+06	4.08023	N/A	Sevenin-21	1.82024e+06	1.77878e+06	127.804
31	U31	1.2349e+06	1.2349e+06	4.67038	N/A	Sevenin-22	1.2349e+06	1.21903e+06	103.936		14	U14	1.59604e+06	1.59604e+06	3.57768	N/A	Sevenin-22	1.59604e+06	1.55832e+06	120.771		31	U31	1.72495e+06	1.72495e+06	3.86664	N/A	Sevenin-22	1.72495e+06	1.68349e+06	120.958
											15	U15	1.51722e+06	1.51722e+06	3.401	N/A	T863	1.51722e+06	1.4795e+06	114.663		32	U32	1.70322e+06	1.70322e+06	3.81793	N/A	T863	1.70322e+06	1.66176e+06	119.397
											16	U16	1.53952e+06	1.53952e+06	3.45099	N/A	DGAT1-in-1	1.53952e+06	1.5018e+06	116.391		33	U33	1.72266e+06	1.72266e+06	3.86151	N/A	DGAT1-in-1	1.72266e+06	1.68121e+06	120.794
											17	U17	506399	506399	1.13514	N/A	ATR-101	506399	468679	36.323		34	U34	498491	498491	1.11741	N/A	ATR-101	498491	457033	32.8376
Figure 5c
Gel name : 20220728_Sevenin-1-IC50-[Phosphor] (Raw 1-D Image)
Index	Name	Volume	Adj. Vol.	% Adj. Vol.	Concentration
		INT*mm2	INT*mm2
						Lane labels	subtract background	Normalize activity to WT (%)		log(conc)
1	U1	28770.9	28770.9	0.0860438	N/A	NC
2	U2	1.783e+06	1.783e+06	5.33234	N/A	Mock	1.75423e+06	100
3	U3	133232	133232	0.398452	N/A	100000	104461	5.95482		5
4	U4	134781	134781	0.403085	N/A	100000	106011	6.04314		5
5	U5	204606	204606	0.611908	N/A	100000	175836	10.0235		5
6	U6	108701	108701	0.325086	N/A	30000	79929.7	4.5564		4.47712
7	U7	136110	136110	0.407059	N/A	30000	107339	6.11888		4.47712
8	U8	124545	124545	0.37247	N/A	30000	95773.7	5.45959		4.47712
9	U9	276125	276125	0.825796	N/A	10000	247354	14.1005		4
10	U10	288687	288687	0.863364	N/A	10000	259916	14.8165		4
11	U11	299850	299850	0.896749	N/A	10000	271079	15.4529		4
12	U12	411438	411438	1.23047	N/A	3000	382667	21.814		3.47712
13	U13	435928	435928	1.30371	N/A	3000	407158	23.2101		3.47712
14	U14	445632	445632	1.33273	N/A	3000	416861	23.7632		3.47712
15	U15	1.09618e+06	1.09618e+06	3.27831	N/A	1000	1.06741e+06	60.8479		3
16	U16	1.03114e+06	1.03114e+06	3.0838	N/A	1000	1.00237e+06	57.1403		3
17	U17	1.12157e+06	1.12157e+06	3.35423	N/A	1000	1.0928e+06	62.2951		3
18	U18	41441.1	41441.1	0.123936	N/A	NC
19	U19	1.77092e+06	1.77092e+06	5.29621	N/A	Mock	1.72948e+06	100
20	U20	1.17208e+06	1.17208e+06	3.50528	N/A	300	1.13064e+06	65.3744		2.47712
21	U21	1.25315e+06	1.25315e+06	3.74775	N/A	300	1.21171e+06	70.0624		2.47712
22	U22	1.25535e+06	1.25535e+06	3.75433	N/A	300	1.21391e+06	70.1895		2.47712
23	U23	1.46328e+06	1.46328e+06	4.37618	N/A	100	1.42184e+06	82.2122		2
24	U24	1.52133e+06	1.52133e+06	4.54978	N/A	100	1.47989e+06	85.5685		2
25	U25	1.53041e+06	1.53041e+06	4.57694	N/A	100	1.48897e+06	86.0937		2
26	U26	1.54178e+06	1.54178e+06	4.61094	N/A	30	1.50034e+06	86.751		1.47712
27	U27	1.55874e+06	1.55874e+06	4.66167	N/A	30	1.5173e+06	87.7318		1.47712
28	U28	1.60398e+06	1.60398e+06	4.79694	N/A	30	1.56253e+06	90.3472		1.47712
29	U29	1.60277e+06	1.60277e+06	4.79335	N/A	10	1.56133e+06	90.2778		1
30	U30	1.72301e+06	1.72301e+06	5.15295	N/A	10	1.68157e+06	97.2302		1
31	U31	1.64051e+06	1.64051e+06	4.90621	N/A	10	1.59907e+06	92.4597		1
32	U32	1.85994e+06	1.85994e+06	5.56243	N/A	3	1.81849e+06	105.147		0.477121
33	U33	1.90686e+06	1.90686e+06	5.70278	N/A	3	1.86542e+06	107.861		0.477121
34	U34	1.93159e+06	1.93159e+06	5.77673	N/A	3	1.89015e+06	109.29		0.477121
Gel name : 20220729_Sevenin-2_IC50-[Phosphor] (Raw 1-D Image)
Index	Name	Volume	Adj. Vol.	% Adj. Vol.	Concentration
		INT*mm2	INT*mm2
						Lane labels	subtract background	Normalize activity to WT (%)
1	U1	174825	174825	0.366704	N/A	NC
2	U2	2.24148e+06	2.24148e+06	4.70161	N/A	Mock	2.12814e+06	100
3	U3	270507	270507	0.567402	N/A	100000	157162	7.38498
4	U4	225532	225532	0.473063	N/A	100000	112187	5.27159
5	U5	113345	113345	0.237746	N/A	100000	0	0
6	U6	419922	419922	0.880806	N/A	30000	306577	14.4059
7	U7	437749	437749	0.918199	N/A	30000	324404	15.2436
8	U8	443908	443908	0.931119	N/A	30000	330563	15.533
9	U9	744649	744649	1.56194	N/A	10000	631304	29.6646
10	U10	847800	847800	1.7783	N/A	10000	734455	34.5117
11	U11	778156	778156	1.63222	N/A	10000	664811	31.2391
12	U12	1.54775e+06	1.54775e+06	3.24648	N/A	3000	1.4344e+06	67.4019
13	U13	1.48626e+06	1.48626e+06	3.1175	N/A	3000	1.37292e+06	64.5126
14	U14	1.5454e+06	1.5454e+06	3.24155	N/A	3000	1.43205e+06	67.2915
15	U15	1.95396e+06	1.95396e+06	4.09853	N/A	1000	1.84062e+06	86.4896
16	U16	1.8338e+06	1.8338e+06	3.84649	N/A	1000	1.72046e+06	80.8433
17	U17	1.81587e+06	1.81587e+06	3.80888	N/A	1000	1.70253e+06	80.0009
18	U18	110349	110349	0.231463	N/A	NC
19	U19	2.03063e+06	2.03063e+06	4.25934	N/A	Mock	1.92028e+06	100
20	U20	2.01486e+06	2.01486e+06	4.22626	N/A	300	1.90451e+06	99.1787
21	U21	2.09153e+06	2.09153e+06	4.38707	N/A	300	1.98118e+06	103.171
22	U22	2.11007e+06	2.11007e+06	4.42596	N/A	300	1.99972e+06	104.137
23	U23	1.8848e+06	1.8848e+06	3.95346	N/A	100	1.77445e+06	92.4058
24	U24	1.87614e+06	1.87614e+06	3.93529	N/A	100	1.76579e+06	91.9548
25	U25	1.8135e+06	1.8135e+06	3.8039	N/A	100	1.70315e+06	88.6927
26	U26	1.96275e+06	1.96275e+06	4.11697	N/A	30	1.8524e+06	96.4653
27	U27	1.93333e+06	1.93333e+06	4.05526	N/A	30	1.82298e+06	94.9332
28	U28	2.09239e+06	2.09239e+06	4.38888	N/A	30	1.98204e+06	103.216
29	U29	1.90898e+06	1.90898e+06	4.00418	N/A	10	1.79863e+06	93.6653
30	U30	1.84127e+06	1.84127e+06	3.86216	N/A	10	1.73092e+06	90.1392
31	U31	1.72836e+06	1.72836e+06	3.62531	N/A	10	1.61801e+06	84.259
32	U32	1.84708e+06	1.84708e+06	3.87433	N/A	3	1.73673e+06	90.4414
33	U33	1.74865e+06	1.74865e+06	3.66788	N/A	3	1.6383e+06	85.3158
34	U34	1.79912e+06	1.79912e+06	3.77375	N/A	3	1.68878e+06	87.9442
Consolidate data from both Sevenin-1 and Sevenin-2 data
Concentration (log[nM])	Sevenin-1			Sevenin-2
5	5.95482	6.04314	10.0235	7.38498	5.27159	0
4.47712	4.5564	6.11888	5.45959	14.4059	15.2436	15.533
4	14.1005	14.8165	15.4529	29.6646	34.5117	31.2391
3.47712	21.814	23.2101	23.7632	67.4019	64.5126	67.2914
3	60.8479	57.1403	62.2951	86.4896	80.8433	80.0009
2.47712	65.3744	70.0624	70.1894	99.1787	103.171	104.137
2	82.2122	85.5685	86.0937	92.4058	91.9548	88.6927
1.47712	86.751	87.7318	90.3472	96.4654	94.9332	103.216
1	90.2778	97.2301	92.4597	93.6653	90.1392	84.2589
0.477121	105.147	107.861	109.29	90.4413	85.3158	87.9442
Statistics
	Sevenin-1	Sevenin-2
Absolute IC50, X is log(concentration)
Best-fit values
Top	100.6	93.64
Baseline	= 4.000	= 4.000
Bottom	0.52	3.923
LogAbsoluteIC50	2.941	3.748
HillSlope	-0.7469	-1.322
AbsoluteIC50	873.1	5604
95% CI (profile likelihood)
Top	94.05 to 110.2	90.64 to 96.73
Bottom	-10.65 to 7.712	-4.802 to 10.78
LogAbsoluteIC50	2.748 to 3.088	3.664 to 3.833
HillSlope	-1.037 to -0.5195	-1.724 to -1.025
AbsoluteIC50	560.3 to 1224	4613 to 6816
Goodness of Fit
Degrees of Freedom	26	26
R squared	0.976	0.9777
Sum of Squares	995.7	795.6
Sy.x	6.188	5.532
Constraints
Baseline	Baseline = 4	Baseline = 4
Number of points
# of X values	30	30
# Y values analyzed	30	30
Figure 5d
Gel name : 20220729_DGAT1_specificity-[Phosphor] (Raw 1-D Image)
Index	Name	Volume	Adj. Vol.	% Adj. Vol.	Concentration
		INT*mm2	INT*mm2
1	U1	22426.5	22426.5	0.0349451	N/A	NC		3.35611e+06
2	U2	3.42707e+06	3.42707e+06	5.34008	N/A	Vehical control	3.40465e+06
3	U3	3.48317e+06	3.48317e+06	5.42749	N/A	Vehical control	3.46074e+06
4	U4	3.22536e+06	3.22536e+06	5.02578	N/A	Vehical control	3.20294e+06
5	U5	60838.6	60838.6	0.094799	N/A	T863_50	38412.1	1.14454
6	U6	36457.5	36457.5	0.0568082	N/A	T863_50	14031	0.418073
7	U7	45082	45082	0.0702471	N/A	T863_50	22655.6	0.675055
8	U8	211716	211716	0.329896	N/A	T863_5	189289	5.64014
9	U9	210617	210617	0.328184	N/A	T863_5	188190	5.6074
10	U10	198864	198864	0.309871	N/A	T863_5	176438	5.25721
11	U11	127786	127786	0.199117	N/A	DGAT1-IN-1_50	105359	3.13934
12	U12	138250	138250	0.215422	N/A	DGAT1-IN-1_50	115824	3.45113
13	U13	133121	133121	0.207429	N/A	DGAT1-IN-1_50	110694	3.29829
14	U14	1.24019e+06	1.24019e+06	1.93247	N/A	DGAT1-IN-1_5	1.21776e+06	36.2849
15	U15	1.15861e+06	1.15861e+06	1.80536	N/A	DGAT1-IN-1_5	1.13619e+06	33.8544
16	U16	1.4029e+06	1.4029e+06	2.186	N/A	DGAT1-IN-1_5	1.38047e+06	41.1331
17	U17	20707.2	20707.2	0.0322661	N/A	NC
18	U18	3.24114e+06	3.24114e+06	5.05035	N/A	Vehical control	3.22043e+06	3.23161e+06
19	U19	3.30256e+06	3.30256e+06	5.14606	N/A	Vehical control	3.28185e+06
20	U20	3.21325e+06	3.21325e+06	5.0069	N/A	Vehical control	3.19254e+06
21	U21	3.01226e+06	3.01226e+06	4.69372	N/A	Sevenin-1_50	2.99155e+06	92.5717
22	U22	3.16418e+06	3.16418e+06	4.93043	N/A	Sevenin-1_50	3.14347e+06	97.2726
23	U23	3.19891e+06	3.19891e+06	4.98455	N/A	Sevenin-1_50	3.1782e+06	98.3473
24	U24	3.25855e+06	3.25855e+06	5.0775	N/A	Sevenin-1_5	3.23785e+06	100.193
25	U25	3.26047e+06	3.26047e+06	5.08048	N/A	Sevenin-1_5	3.23976e+06	100.252
26	U26	2.81863e+06	2.81863e+06	4.392	N/A	Sevenin-1_5	2.79792e+06	86.5799
27	U27	3.3984e+06	3.3984e+06	5.2954	N/A	Sevenin-2_50	3.37769e+06	104.52
28	U28	3.40688e+06	3.40688e+06	5.30861	N/A	Sevenin-2_50	3.38617e+06	104.783
29	U29	3.43052e+06	3.43052e+06	5.34546	N/A	Sevenin-2_50	3.40982e+06	105.515
30	U30	3.45954e+06	3.45954e+06	5.39067	N/A	Sevenin-2_5	3.43883e+06	106.412
31	U31	3.43068e+06	3.43068e+06	5.34571	N/A	Sevenin-2_5	3.40997e+06	105.519
32	U32	3.43728e+06	3.43728e+06	5.35599	N/A	Sevenin-2_5	3.41657e+06	105.724
Background control subtraction; Normalized activty to Vehical control (%); Transpose data
	T863			DGAT1-IN-1			Sevenin-1			Sevenin-2
50 uM	1.14454	0.418073	0.675055	3.13934	3.45113	3.29829	92.5717	97.2726	98.3473	104.52	104.783	105.515
10 uM	5.64014	5.6074	5.25721	36.2849	33.8544	41.1331	100.193	100.252	86.5799	106.412	105.519	105.724

## Sheet: Supplementary Figure 1
Supplementary Figure 1b
Application: Tecan i-control				Tecan i-control , 1.12.4.0
Device: infinite 200				Serial number: 812001435				Serial number of connected stacker:
Firmware: V_2.11_04/08_InfiniTe (Apr 4 2008/14.37.11)				MAI, V_2.11_04/08_InfiniTe (Apr 4 2008/14.37.11)
System				HSPH-F7QMJB2
User				HSPH-F7QMJB2\FareseWalther
Plate				Thermo Fisher Scientific-Nunclon 96 Flat Bottom Black Polystyrene Catalog No.: 137101/137103/237105/237107/237108/437111/437112 [NUN96fb.pdfx]
Plate-ID (Stacker)
Shaking (Linear) Duration:				5	s
Shaking (Linear) Amplitude:				1	mm
Label: Label1_Copy1
Mode				Fluorescence Top Reading
Excitation Wavelength				355	nm
Emission Wavelength				460	nm
Excitation Bandwidth				9	nm
Emission Bandwidth				20	nm
Gain				100	Manual
Number of Flashes				15
Integration Time				20	µs
Lag Time				0	µs
Settle Time				15	ms
Part of Plate				B2-D10
	Temperature: 25.7 °C
<>	2	3	4	5	6	7	8	9	10
B	5093	5163	4836	5209	4923	4924	4792	4770	246
C	40432	46747	49369	48794	4568	4647	4572	4519	270
D	39840	53892	56194	49588	4382	4299	4251	4390	275
						background	263.667
	2	3	4	5	6	7	8	9
B	5093	5163	4836	5209	4923	4924	4792	4770
C	40432	46747	49369	48794	4568	4647	4572	4519
D	39840	53892	56194	49588	4382	4299	4251	4390
Subtract Background
	B	C	D
2	4829.33	40168.3	39576.3
3	4899.33	46483.3	53628.3
4	4572.33	49105.3	55930.3
5	4945.33	48530.3	49324.3
6	4659.33	4304.33	4118.33
7	4660.33	4383.33	4035.33
8	4528.33	4308.33	3987.33
9	4506.33	4255.33	4126.33
Transpose data
No protein control	BSA	MBOAT7 in DDM	MBOAT7 in DDM (boiled)	MBOAT7 in PMAL-C8	MBOAT7 in PMAL-C8 (boiled)
4829.33	4659.33	40168.3	4304.33	39576.3	4118.33
4899.33	4660.33	46483.3	4383.33	53628.3	4035.33
4572.33	4528.33	49105.3	4308.33	55930.3	3987.33
4945.33	4506.33	48530.3	4255.33	49324.3	4126.33
Statistics
Unpaired t test
Table Analyzed	Detergent vs PMAL
Column E	MBOAT7 in PMAL-C8
vs.	vs.
Column C	MBOAT7 in DDM
Unpaired t test
P value	0.4265
P value summary	ns
Significantly different (P < 0.05)?	No
One- or two-tailed P value?	Two-tailed
t, df	t=0.8528, df=6
How big is the difference?
Mean of column C	46072
Mean of column E	49615
Difference between means (E - C) ± SEM	3543 ± 4154
95% confidence interval	-6623 to 13709
R squared (eta squared)	0.1081
F test to compare variances
F, DFn, Dfd	3.120, 3, 3
P value	0.375
P value summary	ns
Significantly different (P < 0.05)?	No
Data analyzed
Sample size, column C	4
Sample size, column E	4
Supplementary Figure 1c
Application: Tecan i-control				Tecan i-control , 1.12.4.0
Device: infinite 200				Serial number: 812001435				Serial number of connected stacker:
Firmware: V_2.11_04/08_InfiniTe (Apr 4 2008/14.37.11)				MAI, V_2.11_04/08_InfiniTe (Apr 4 2008/14.37.11)
System				HSPH-F7QMJB2
User				HSPH-F7QMJB2\FareseWalther
Plate				Thermo Fisher Scientific-Nunclon 96 Flat Bottom Black Polystyrene Catalog No.: 137101/137103/237105/237107/237108/437111/437112 [NUN96fb.pdfx]
Plate-ID (Stacker)
Shaking (Linear) Duration:				5	s
Shaking (Linear) Amplitude:				1	mm
Label: Label1_Copy1
Mode				Fluorescence Top Reading
Excitation Wavelength				355	nm
Emission Wavelength				460	nm
Excitation Bandwidth				9	nm
Emission Bandwidth				20	nm
Gain				100	Manual
Number of Flashes				15
Integration Time				20	µs
Lag Time				0	µs
Settle Time				15	ms
Part of Plate				B1-G12
	Temperature: 23.6 °C
<>	1	2	3	4	5	6	7	8	9	10	11	12
B	384	4254	4368	8476	7069	4417	8063	7213	7307	280	295	295
C	272	7243	7451	7020	6125	7561	8105	7980	7685	274	283	281
D	276	9562	9411	9980	9334	14679	14612	14699	14564	274	295	279
E	272	18298	16260	16697	17565	21464	21103	21423	23670	275	285	287
F	274	25403	23101	21619	22892	18730	24693	17735	17648	301	277	287
G	1357	1287	2016	1862	3600	3522	9052	8720	1885	1361	51451	50809
Transpose data							Subtract background
															Convert to activity based on calculated standard curve
	AA-CoA (uM)						Background		AA-CoA (uM)						AA-CoA (uM)
	0	4254	4368	8476	7069		6041.75		0
	2.5	4417	8063	7213	7307				2.5		2021.25	1171.25	1265.25		0	0	0	0	0
	5	7243	7451	7020	6125				5	1201.25	1409.25	978.25			5	52.0458	54.6805	49.2212	36.83
	10	7561	8105	7980	7685				10	1519.25	2063.25	1938.25	1643.25		10	56.0738	62.9645	61.3812	57.6445
	20	9562	9411	9980	9334				20	3520.25	3369.25	3938.25	3292.25		20	81.4198	79.5072	86.7145	78.5318
	50	14679	14612	14699	14564				50	8637.25	8570.25	8657.25	8522.25		50	146.235	145.387	146.489	144.779
	75	18298	16260	16697	17565				75	12256.2	10218.2	10655.2	11523.2		75	192.076	166.261	171.797	182.791
	100	21464	21103	21423	23670				100	15422.2	15061.2	15381.2	17628.2		100	232.178	227.606	231.659	260.121
	125	25403	23101	21619	22892				125	19361.2	17059.2	15577.2	16850.2		125	282.072	252.914	234.142	250.267
	150	18730	24693	17735	17648				150	12688.2	18651.2	11693.2	11606.2		150	197.548	273.079	184.944	183.842
Standard curve (Signal to activity)
Standard
	CoA (uM)		Background	1322				Fluorescence	CoA (uM)
	0	1357	0					0	0
	0	1287	0					694	5
	5	2016	694					540	5
	5	1862	540					2278	10
	10	3600	2278					2200	10
	10	3522	2200					7730	25
	25	9052	7730					7398	25
	25	8720	7398					50129	100
	50	1885						49487	100
	50	1361
	100	51451	50129
	100	50809	49487
Statistics
Nonlin Fit
Comparison of Fits
Null hypothesis	Michaelis-Menten
Alternative hypothesis	Allosteric sigmoidal
P value	0.214
Conclusion (alpha = 0.05)	Do not reject null hypothesis
Preferred model	Michaelis-Menten
F (DFn, DFd)	1.605 (1, 33)
Michaelis-Menten
Best-fit values
Vmax	298.4
Km	45.95
Std. Error
Vmax	18.66
Km	7.971
95% CI (profile likelihood)
Vmax	264.7 to 344.8
Km	32.23 to 66.84
Goodness of Fit
Degrees of Freedom	34
R squared	0.944
Sum of Squares	13671
Sy.x	20.05
Replicates test for lack of fit
SD replicates	16.81
SD lack of fit	29.38
Discrepancy (F)	3.054
P value	0.0168
Evidence of inadequate model?	Yes
Constraints
Km	Km > 0
Allosteric sigmoidal
Best-fit values
Vmax	379.9
h	0.7905
Khalf	84.49
Kprime	33.35
Std. Error
Vmax	118.3
h	0.166
Khalf	69.86
Kprime	7.812
95% CI (profile likelihood)
Vmax	265.7 to 4863
h	0.4817 to 1.137
Khalf	33.94 to 63772
Goodness of Fit
Degrees of Freedom	33
R squared	0.9466
Sum of Squares	13036
Sy.x	19.88
Replicates test for lack of fit
SD replicates	16.81
SD lack of fit	30.02
Discrepancy (F)	3.189
P value	0.0169
Evidence of inadequate model?	Yes
Constraints
h	h > 0
Khalf	Khalf > 0
Number of points
# of X values	36
# Y values analyzed	36
Supplementary Figure 1d
Application: Tecan i-control				Tecan i-control , 1.12.4.0
Device: infinite 200				Serial number: 812001435				Serial number of connected stacker:
Firmware: V_2.11_04/08_InfiniTe (Apr 4 2008/14.37.11)				MAI, V_2.11_04/08_InfiniTe (Apr 4 2008/14.37.11)
System				HSPH-F7QMJB2
User				HSPH-F7QMJB2\FareseWalther
Plate				Thermo Fisher Scientific-Nunclon 96 Flat Bottom Black Polystyrene Catalog No.: 137101/137103/237105/237107/237108/437111/437112 [NUN96fb.pdfx]
Plate-ID (Stacker)
Shaking (Linear) Duration:				5	s
Shaking (Linear) Amplitude:				1	mm
Label: Label1_Copy1
Mode				Fluorescence Top Reading
Excitation Wavelength				355	nm
Emission Wavelength				460	nm
Excitation Bandwidth				9	nm
Emission Bandwidth				20	nm
Gain				100	Manual
Number of Flashes				15
Integration Time				20	µs
Lag Time				0	µs
Settle Time				15	ms
Part of Plate				B1-G12
	Temperature: 23.5 °C
<>	1	2	3	4	5	6	7	8	9	10	11	12
B	287	7624	7442	7707	7356	7652	8114	8255	7888	262	267	267
C	265	10532	8408	11484	10427	9066	12924	11057	7488	259	266	263
D	283	14469	16899	15930	15631	21848	25069	24013	22637	260	257	258
E	282	23589	25610	25987	23828	25405	26061	22425	26653	251	252	259
F	275	24057	22009	31123	17886	24608	22172	21404	18094	257	245	254
G	1075	851	1608	1619	3386	5134	8768	10624	20801	20036	40796	32334
Transpose data							Subtract background								Convert to activity
	Lyso-PI (uM)						Background		Lyso-PI (uM)						Lyso-PI (uM)
	0	7624	7442	7707	7356		7532.25		0	0	0	0	0		0
	2.5	7652	8114	8255	7888				2.5	119.75	581.75	722.75	355.75		2.5	1.86173	2.60093	2.82653	2.23933
	5	10532	8408	11484	10427				5	2999.75	875.75	3951.75	2894.75		5	6.46973	3.07133	7.99293	6.30173
	10	9066	12924	11057	7488				10	1533.75	5391.75	3524.75			10	4.12413	10.2969	7.30973	1.67013
	20	14469	16899	15930	15631				20	6936.75	9366.75	8397.75	8098.75		20	12.7689	16.6569	15.1065	14.6281
	50	21848	25069	24013	22637				50	14315.8	17536.8	16480.8	15104.8		50	24.5753	29.7289	28.0393	25.8377
	75	23589	25610	25987	23828				75	16056.8	18077.8	18454.8	16295.8		75	27.3609	30.5945	31.1977	27.7433
	100	25405	26061	22425	26653				100	17872.8	18528.8	14892.8	19120.8		100	30.2665	31.3161	25.4985	32.2633
	125	24057	22009	31123	17886				125	16524.8	14476.8	23590.8	10353.8		125	28.1097	24.8329	39.4153	18.2361
	150	24608	22172	21404	18094				150	17075.8	14639.8	13871.8	10561.8		150	28.9913	25.0937	23.8649	18.5689
Standard Curve
Standard
	CoA (uM)			Background	963			Fluorescence	CoA (uM)
	0	1075
	0	851						0	0
	5	1608						645	5
	5	1619						656	5
	10	3386						2423	10
	10	5134						4171	10
	25	8768						7805	25
	25	10624						9661	25
	50	20801						19838	50
	50	20036						19073	50
	100	40796						39833	100
	100	32334
Statistics
Nonlin fit
Michaelis-Menten
Best-fit values
Vmax	365.8
Km	26.03
Std. Error
Vmax	20.98
Km	5.063
95% CI (profile likelihood)
Vmax	329.8 to 410.6
Km	18.25 to 37.52
Goodness of Fit
Degrees of Freedom	34
R squared	0.924
Sum of Squares	39580
Sy.x	34.12
Replicates test for lack of fit
SD replicates	29.47
SD lack of fit	46.1
Discrepancy (F)	2.447
P value	0.0403
Evidence of inadequate model?	Yes
Constraints
Km	Km > 0
Number of points
# of X values	40
# Y values analyzed	36
Supplementary Figure 1e
Application: Tecan i-control				Tecan i-control , 1.12.4.0
Device: infinite 200				Serial number: 812001435				Serial number of connected stacker:
Firmware: V_2.11_04/08_InfiniTe (Apr 4 2008/14.37.11)				MAI, V_2.11_04/08_InfiniTe (Apr 4 2008/14.37.11)
System				HSPH-F7QMJB2
User				HSPH-F7QMJB2\FareseWalther
Plate				Thermo Fisher Scientific-Nunclon 96 Flat Bottom Black Polystyrene Catalog No.: 137101/137103/237105/237107/237108/437111/437112 [NUN96fb.pdfx]
Plate-ID (Stacker)
Shaking (Linear) Duration:				5	s
Shaking (Linear) Amplitude:				1	mm
Label: Label1_Copy1
Mode				Fluorescence Top Reading
Excitation Wavelength				355	nm
Emission Wavelength				460	nm
Excitation Bandwidth				9	nm
Emission Bandwidth				20	nm
Gain				100	Manual
Number of Flashes				15
Integration Time				20	µs
Lag Time				0	µs
Settle Time				15	ms
Part of Plate				E1-H12
	Temperature: 22.3 °C
<>	1	2	3	4	5	6	7	8	9	10	11	12
E	246	5533	4111	4184	3932	5527	3954	4021	7958	267	268	269
F	250	8308	8223	7663	7432	7384	6718	7643	5738	257	259	259
G	258	6900	10268	10318	9666	15515	13293	15248	13087	269	265	266
H	263	11516	10058	9552	9501	27918	26274	27110	24238	260	270	267
Transpose data								Subtract background
								b/g	4147.5
		NC	5533	4111	4184	3932
		C4:0-CoA	5527	3954	4021	7958		1380	-193	-126	3811
		C10:0-CoA	7384	6718	7643	5738		3237	2571	3496	1591
		C12:0-CoA	8308	8223	7663	7432		4161	4076	3516	3285
		C16:1-CoA	6900	10268	10318	9666		2753	6121	6171	5519
		C18:1-CoA	15515	13293	15248	13087		11368	9146	11101	8940
		C20:0-CoA	11516	10058	9552	9501		7369	5911	5405	5354
		C20:4-CoA	27918	26274	27110	24238		23771	22127	22963	20091
Transpose
		C4:0-CoA	C10:0-CoA	C12:0-CoA	C16:1-CoA	C18:1-CoA	C20:0-CoA	C20:4-CoA
		1380	3237	4161	2753	11368	7369	23771
		-193	2571	4076	6121	9146	5911	22127
		-126	3496	3516	6171	11101	5405	22963
		3811	1591	3285	5519	8940	5354	20091
Normalize activity to C20:4-CoA (%)
		C4:0-CoA	C10:0-CoA	C12:0-CoA	C16:1-CoA	C18:1-CoA	C20:0-CoA	C20:4-CoA
		6.20559	14.5562	18.7112	12.3797	51.1197	33.137	106.894
		-0.867884	11.5613	18.329	27.525	41.1278	26.5806	99.5009
		-0.566598	15.7208	15.8108	27.7498	49.9191	24.3052	103.26
		17.1373	7.15442	14.772	24.8179	40.2015	24.0759	90.3454
Supplementary Figure 1f
Application: Tecan i-control				Tecan i-control , 1.12.4.0
Device: infinite 200				Serial number: 812001435				Serial number of connected stacker:
Firmware: V_2.11_04/08_InfiniTe (Apr 4 2008/14.37.11)				MAI, V_2.11_04/08_InfiniTe (Apr 4 2008/14.37.11)
System				HSPH-F7QMJB2
User				HSPH-F7QMJB2\FareseWalther
Plate				Thermo Fisher Scientific-Nunclon 96 Flat Bottom Black Polystyrene Catalog No.: 137101/137103/237105/237107/237108/437111/437112 [NUN96fb.pdfx]
Plate-ID (Stacker)
Shaking (Linear) Duration:				5	s
Shaking (Linear) Amplitude:				1	mm
Label: Label1_Copy1
Mode				Fluorescence Top Reading
Excitation Wavelength				355	nm
Emission Wavelength				460	nm
Excitation Bandwidth				9	nm
Emission Bandwidth				20	nm
Gain				100	Manual
Number of Flashes				15
Integration Time				20	µs
Lag Time				0	µs
Settle Time				15	ms
Part of Plate				A1-D12
	Temperature: 23.1 °C
<>	1	2	3	4	5	6	7	8	9	10	11	12
A	287	5546	9158	6126	9751	24989	38799	30734	32128	278	293	285		NC	PI
B	264	5566	6186	8001	8528	9410	8637	10366	5929	280	279	273		PS	PG
C	281	8498	8454	7480	8730	8559	8587	7473	6055	279	279	282		PA	PE
D	260	4585	4759	4788	4742	268	269	276	268	270	277	284		PC
Transpose data							Subtract background						Nomarlize activity to lyso-PI (%)
	NC	5546	9158	6126	9751			B/G	4718.5				26944.5
	PI	24989	38799	30734	32128		PI	20271	34081	26016	27410		75.2324	126.486	96.554	101.728
	PS	5566	6186	8001	8528		PS	848	1468	3283	3810		3.14721	5.44824	12.1843	14.1402
	PG	9410	8637	10366	5929		PG	4692	3919	5648	1211		17.4136	14.5447	20.9616	4.49442
	PA	8498	8454	7480	8730		PA	3780	3736	2762	4012		14.0288	13.8655	10.2507	14.8899
	PE	8559	8587	7473	6055		PE	3841	3869	2755	1337		14.2552	14.3591	10.2247	4.96205
	PC	4585	4759	4788	4742		PC	-133	41	70	24		-0.493607	0.152165	0.259793	0.089072
Transpose data
		PA	PS	PG	PE	PC	PI
		14.0288	3.14721	17.4136	14.2552	-0.493607	75.2324
		13.8655	5.44824	14.5447	14.3591	0.152165	126.486
		10.2507	12.1843	20.9616	10.2247	0.259793	96.554
		14.8899	14.1402	4.49442	4.96205	0.089072	101.728

## Sheet: Supplementary Figure 7
Supplementary Figure 7a
Protein							lyso-PI
time (ns)	first (A)	second (A)	third (A)				time (ns)	first (A)	second (A)	third (A)
0	4.49383e-06	4.59548e-06	4.56667e-06				0	5.87884e-06	5.36097e-06	5.97095e-06
0.2	1.21294	1.26572	1.22466				0.2	1.48571	3.14544	1.65369
0.4	1.32484	1.4389	1.68184				0.4	1.77783	3.56724	1.88841
0.6	1.41215	1.35739	1.69809				0.6	2.34127	3.24806	1.8989
0.8	1.52976	1.37063	1.60639				0.8	2.722	3.07408	1.68221
1	1.73815	1.3932	1.87469				1	2.94044	3.17335	1.76066
1.2	1.55023	1.39418	1.68332				1.2	3.50765	2.45136	2.24776
1.4	1.49332	1.2854	2.0076				1.4	2.89274	2.9935	1.65171
1.6	1.51621	1.4455	1.78083				1.6	3.5482	3.32037	2.12958
1.8	1.49041	1.26232	1.84323				1.8	3.3532	3.04256	2.70038
2	1.5393	1.31244	1.66516				2	2.86305	3.20196	2.96387
2.2	1.34482	1.38075	1.63122				2.2	3.12058	3.3975	2.97827
2.4	1.46203	1.37617	1.69463				2.4	2.31512	3.03441	2.45406
2.6	1.46144	1.44209	1.83547				2.6	2.82365	3.47043	2.45785
2.8	1.63024	1.65533	1.66026				2.8	2.82561	3.04468	2.19398
3	1.64123	1.53633	1.78116				3	3.41573	3.42314	1.6981
3.2	1.2786	1.40325	1.6372				3.2	3.11885	3.7705	2.03645
3.4	1.38686	1.6511	1.63777				3.4	2.58934	4.19493	2.47489
3.6	1.39432	1.36747	1.75728				3.6	2.71395	3.26895	2.13764
3.8	1.50285	1.46426	1.59057				3.8	2.76061	3.06896	2.17758
4	1.50764	1.43087	1.55984				4	2.53438	2.86287	2.79192
4.2	1.30801	1.89034	1.4601				4.2	2.64328	2.67806	2.84766
4.4	1.44804	1.68425	1.5911				4.4	2.71116	2.6277	2.86626
4.6	1.61514	1.87112	1.62606				4.6	2.92521	3.16979	2.57302
4.8	1.65079	1.78594	1.5777				4.8	3.02553	3.17888	2.71014
5	1.61068	1.80406	1.66902				5	3.33853	3.2017	2.65169
5.2	1.55788	1.77795	1.77683				5.2	2.48834	3.18984	2.40971
5.4	1.42962	1.97542	1.67567				5.4	2.84074	2.91653	2.68644
5.6	1.51537	1.65466	2.01344				5.6	2.4979	3.12008	3.06375
5.8	1.57235	1.7796	1.83919				5.8	3.10407	3.12824	2.69072
6	1.57232	1.80239	1.88343				6	3.21436	3.41134	2.51503
6.2	1.50422	1.53905	1.59939				6.2	2.7354	3.2702	2.20544
6.4	1.64056	1.62037	1.93227				6.4	3.3483	3.07606	2.63153
6.6	1.67169	1.45357	1.84021				6.6	2.99943	3.02104	2.72339
6.8	1.55988	1.66708	1.8527				6.8	3.40453	2.99947	2.51774
7	1.59327	1.70769	1.84903				7	3.2034	3.44429	2.15963
7.2	1.55391	1.80317	1.96851				7.2	3.26876	3.22715	1.75701
7.4	1.67132	1.93123	1.95375				7.4	3.31588	3.62158	2.16104
7.6	1.5193	1.94392	1.97901				7.6	3.05435	3.28391	2.00415
7.8	1.66162	1.81478	2.157				7.8	2.79372	3.668	3.1796
8	1.65254	1.86342	1.74865				8	3.22586	3.18123	3.18398
8.2	1.63073	1.82796	1.73597				8.2	2.80116	3.69409	2.99298
8.4	1.57423	1.66491	1.93518				8.4	2.90969	3.46152	3.17869
8.6	1.70287	1.7662	1.46054				8.6	3.12308	3.00997	2.85824
8.8	1.77378	1.87358	1.48667				8.8	2.90685	3.31059	2.91601
9	1.4712	1.94356	1.64346				9	2.91416	2.99199	3.30143
9.2	1.7221	1.83432	2.00208				9.2	3.23564	4.15767	3.15655
9.4	1.58665	1.78626	2.00677				9.4	2.94248	4.43275	3.18842
9.6	1.63978	1.93012	2.24857				9.6	2.79525	3.14552	3.35697
9.8	1.67365	1.89858	2.80118				9.8	3.01497	3.35356	3.0021
10	1.83975	1.98412	2.72011				10	3.34477	2.91094	2.6299
10.2	1.8647	1.97462	2.66997				10.2	2.99071	3.16765	3.59221
10.4	1.7623	1.92573	2.51064				10.4	2.63969	3.32491	3.56612
10.6	1.91944	1.81342	2.57711				10.6	3.36525	3.49211	3.26753
10.8	1.89489	1.87315	2.3177				10.8	3.26347	3.27207	3.1895
11	1.68245	1.57378	2.47305				11	3.18609	3.37833	3.73737
11.2	1.62832	1.47278	2.28273				11.2	2.97363	2.98428	3.08364
11.4	1.6732	1.51722	2.29759				11.4	3.19193	3.12665	2.88639
11.6	1.78879	1.72001	2.47413				11.6	3.02526	3.26145	3.90812
11.8	1.68965	1.63748	2.22389				11.8	3.01281	3.25989	3.51199
12	1.7152	1.4192	2.03478				12	2.8761	3.46054	3.6963
12.2	1.88798	1.32253	2.18322				12.2	2.88751	2.88168	3.90855
12.4	1.63383	1.50375	2.38195				12.4	3.09058	3.41309	3.57457
12.6	1.50899	1.68478	2.23309				12.6	3.28596	3.58946	3.06263
12.8	1.79554	1.43752	2.36857				12.8	3.48767	3.31	3.60915
13	2.02894	1.39071	2.21279				13	3.24139	3.6561	3.37367
13.2	1.72283	1.36617	2.4819				13.2	3.92621	3.54092	3.45945
13.4	1.7528	1.45213	2.49806				13.4	3.22109	3.3792	3.09212
13.6	1.86519	1.3719	2.5373				13.6	4.30519	2.92898	3.68591
13.8	1.72909	1.41396	2.37252				13.8	3.93923	2.67436	3.40833
14	1.8364	1.41014	2.52487				14	3.5396	3.32219	3.40333
14.2	1.87297	1.36822	2.55405				14.2	3.52005	3.11192	3.52272
14.4	1.8704	1.32419	2.5536				14.4	2.99463	2.47204	3.27018
14.6	1.86224	1.40418	2.4402				14.6	2.63125	2.86699	3.28018
14.8	1.68645	1.42508	2.47554				14.8	2.58885	3.45914	3.15933
15	1.87179	1.28989	2.40087				15	3.01005	2.76343	3.39716
15.2	1.82668	1.43192	2.72812				15.2	2.8003	3.33852	3.49916
15.4	2.12005	1.43766	2.75126				15.4	2.77943	3.64385	3.56812
15.6	1.67584	1.4085	2.72976				15.6	2.66008	3.94253	3.68527
15.8	1.90397	1.47701	2.83885				15.8	2.96019	3.92983	3.56336
16	1.76616	1.54666	2.74848				16	3.04951	3.70458	3.33676
16.2	1.64692	1.52638	2.78428				16.2	2.98769	3.31335	2.76413
16.4	1.69631	1.58709	2.74344				16.4	3.21608	3.10422	3.22803
16.6	1.74978	1.64818	2.86773				16.6	3.36354	2.98452	3.64187
16.8	1.90223	1.59244	2.64329				16.8	3.14152	2.52274	3.24722
17	1.95995	1.58386	2.43429				17	3.10381	2.79339	3.02241
17.2	1.96491	1.41779	2.75603				17.2	3.00621	2.9495	3.46393
17.4	1.8478	1.46337	2.46047				17.4	3.03681	2.52094	3.58323
17.6	1.76665	1.3717	2.55972				17.6	2.77892	2.9328	3.51559
17.8	1.84756	1.49396	2.93259				17.8	2.72898	3.61393	3.40271
18	2.04744	1.54554	2.57495				18	3.33346	3.42072	3.8006
18.2	2.19137	1.53856	2.72879				18.2	3.22544	3.9066	3.03176
18.4	1.8983	1.64729	2.71994				18.4	3.01252	3.82871	3.73674
18.6	1.92621	1.64816	2.5792				18.6	2.88087	3.87602	2.88837
18.8	1.99333	1.60593	2.70789				18.8	2.8624	4.01623	3.4775
19	1.70211	1.58723	2.89028				19	3.07371	3.26913	3.17497
19.2	1.74332	1.73371	2.91291				19.2	2.94848	3.296	3.47165
19.4	1.83696	1.6975	2.62611				19.4	2.75193	3.70215	3.32403
19.6	1.89112	1.63967	2.75955				19.6	2.86493	3.63442	3.1584
19.8	1.83053	1.57098	2.74234				19.8	2.98697	3.8679	3.51525
20	1.74185	1.48344	2.38106				20	3.15999	3.72647	2.95816
20.2	1.60603	1.49551	2.4457				20.2	2.96929	2.99557	3.30345
20.4	1.74024	1.66528	2.3701				20.4	3.0883	3.70672	3.02305
20.6	1.75881	1.53294	2.40517				20.6	2.99562	4.04772	3.21312
20.8	1.58994	1.59166	2.25906				20.8	3.0804	3.66689	3.01046
21	1.80223	1.61094	2.60317				21	3.37127	3.93783	3.42317
21.2	1.84687	1.78269	2.72529				21.2	3.2573	3.0711	3.0829
21.4	1.80673	1.59737	2.58259				21.4	3.10328	3.09426	3.0068
21.6	1.92339	1.41363	2.52677				21.6	3.14865	2.46142	3.58034
21.8	1.80664	1.66092	2.70278				21.8	3.21631	4.61643	3.75729
22	2.04137	1.52667	2.6549				22	3.22496	5.32174	3.53424
22.2	1.87267	1.48784	2.66491				22.2	3.40539	6.86881	3.64663
22.4	1.92065	1.70058	2.74477				22.4	3.3573	7.61966	3.55662
22.6	1.65972	1.59965	2.64337				22.6	3.0785	7.26156	3.49661
22.8	1.59874	1.59674	2.40261				22.8	2.63273	6.6712	3.45746
23	1.78363	1.50272	2.54448				23	3.81293	5.77192	3.08473
23.2	1.64766	1.46604	2.49413				23.2	3.04785	5.57708	3.21851
23.4	1.57953	1.33662	2.32218				23.4	3.12568	5.50085	3.40316
23.6	1.73752	1.43404	2.50555				23.6	3.00638	5.67744	3.19067
23.8	1.71981	1.36162	2.6588				23.8	3.14968	6.08142	3.34961
24	1.82006	1.43231	2.33748				24	3.39917	6.21203	3.3649
24.2	1.70084	1.50726	2.91382				24.2	3.09803	7.02428	3.68916
24.4	1.64315	1.44663	2.79734				24.4	2.78557	6.12951	3.40652
24.6	1.65108	1.45898	2.70229				24.6	2.7297	6.70473	3.68804
24.8	1.59748	1.35302	2.81993				24.8	3.04203	6.5942	3.40557
25	1.69566	1.64312	2.90381				25	2.85842	7.00311	2.7668
25.2	1.79086	1.5543	2.84299				25.2	2.93183	5.6142	3.06351
25.4	1.72434	1.4282	3.03669				25.4	3.09671	4.7979	3.18233
25.6	1.6926	1.35852	2.72552				25.6	3.02521	5.24922	2.8256
25.8	1.65559	1.41191	2.59503				25.8	3.00058	6.12261	3.30563
26	1.74057	1.43579	2.82516				26	2.98454	6.36677	3.41964
26.2	1.81369	1.43334	2.87385				26.2	3.06973	7.35212	2.86538
26.4	1.81122	1.46409	2.80068				26.4	2.98773	7.13653	3.36666
26.6	1.92123	1.46918	2.91144				26.6	2.91104	6.6691	3.78126
26.8	1.68407	1.54818	2.64171				26.8	3.17392	5.71948	4.1744
27	1.75244	1.55103	2.70936				27	2.66509	5.76544	3.34745
27.2	1.77117	1.70108	2.45789				27.2	2.5725	5.37947	2.99869
27.4	1.77596	1.53904	2.46763				27.4	3.13606	5.38072	3.75692
27.6	1.8664	1.80772	2.5668				27.6	2.75774	5.43945	3.85914
27.8	1.67892	1.78479	2.88886				27.8	2.97918	5.48006	3.98805
28	1.76843	1.65719	2.58551				28	2.88299	5.39491	3.94686
28.2	1.99019	1.70034	2.74622				28.2	2.88663	5.8925	3.82801
28.4	1.80241	1.69354	2.68784				28.4	3.00624	6.18855	3.46872
28.6	1.96513	1.52294	2.47453				28.6	2.54832	5.88737	3.18818
28.8	1.94683	1.5739	2.61763				28.8	2.80484	5.4219	3.52224
29	1.93575	1.61669	2.77948				29	2.57237	6.73735	2.91926
29.2	1.76868	1.74643	2.90231				29.2	2.92831	6.64181	3.26779
29.4	1.6562	1.50766	2.85148				29.4	2.72526	8.67287	3.27037
29.6	1.73366	1.54544	3.01612				29.6	2.99174	7.48331	3.05409
29.8	1.73207	1.52227	2.8762				29.8	3.10468	7.80157	3.02584
30	1.92216	1.45283	3.15766				30	3.14326	7.69468	3.30834
30.2	1.75745	1.44836	2.85105				30.2	3.46965	6.9709	3.03176
30.4	1.83057	1.45054	3.12624				30.4	3.62894	8.22877	3.17533
30.6	1.87637	1.40835	2.79796				30.6	2.75246	8.03398	2.89121
30.8	1.84451	1.50787	2.91127				30.8	3.12271	7.42654	4.02328
31	1.94249	1.42034	2.95555				31	3.14159	9.06342	2.76475
31.2	1.97083	1.49341	2.70628				31.2	3.04012	9.20891	2.93991
31.4	2.1096	1.66378	3.12012				31.4	3.21741	8.38088	3.26484
31.6	2.08577	1.71601	2.74428				31.6	3.09233	7.99515	2.95834
31.8	1.95211	1.69399	2.94779				31.8	3.23041	9.07144	3.02218
32	2.00402	1.80894	2.77133				32	3.12262	8.67195	3.24601
32.2	1.95407	1.56578	2.84832				32.2	3.52442	7.94747	3.42746
32.4	2.02592	1.72507	2.82087				32.4	3.58587	7.71662	3.54407
32.6	2.15869	1.7275	2.45467				32.6	3.25699	8.0357	3.15801
32.8	1.98573	1.74813	2.60491				32.8	3.00622	8.91889	3.29098
33	1.91185	1.77744	2.54344				33	3.56838	8.36874	3.84175
33.2	1.95908	1.75828	2.71455				33.2	3.47173	8.40159	3.50234
33.4	1.91167	1.79251	2.82896				33.4	3.67229	8.32462	3.52242
33.6	1.87788	1.80776	2.87498				33.6	3.3965	9.00733	3.1497
33.8	1.82087	1.80423	2.85771				33.8	2.87803	9.14923	3.10369
34	1.94449	1.65733	3.03419				34	3.85748	9.01239	3.54606
34.2	1.9614	1.77688	3.09816				34.2	3.24765	8.50498	3.35106
34.4	1.94455	1.72254	3.14841				34.4	2.95318	8.93684	3.5004
34.6	2.05508	1.6848	3.05427				34.6	3.07824	8.90358	4.11145
34.8	1.97622	1.82829	2.93048				34.8	3.11691	8.68004	3.49973
35	1.92191	1.79015	3.24877				35	3.16116	9.58606	2.95418
35.2	1.83216	1.7427	2.99619				35.2	3.12717	9.65461	3.05402
35.4	1.92965	1.70603	3.10904				35.4	3.35699	8.55856	3.42146
35.6	1.84971	1.64882	3.0989				35.6	3.28098	7.70734	3.45301
35.8	1.78689	1.65923	2.80594				35.8	3.34243	7.35432	3.731
36	1.80759	1.82335	3.28347				36	3.32452	7.99462	3.83542
36.2	1.89661	1.93357	2.78107				36.2	3.0737	7.59153	3.94143
36.4	1.79616	1.70078	2.6564				36.4	3.13286	7.69868	3.45071
36.6	1.91095	1.64768	2.60924				36.6	3.21312	7.59671	3.19523
36.8	1.92442	1.7885	2.77469				36.8	3.17789	7.6801	3.69201
37	1.88314	1.83924	2.77649				37	3.07084	8.47977	3.08149
37.2	1.93705	1.8235	2.56045				37.2	3.58008	9.13645	3.48591
37.4	1.93514	1.61868	2.63503				37.4	3.48587	8.45599	3.10577
37.6	1.84329	1.70124	2.75023				37.6	3.6256	9.30305	3.23083
37.8	2.02505	1.80537	2.9306				37.8	3.50604	8.38197	3.23206
38	1.95877	1.77456	2.94752				38	3.4776	8.72468	3.35999
38.2	1.99844	2.00102	2.58157				38.2	3.13665	8.7233	3.51096
38.4	1.96746	1.99587	2.67995				38.4	3.19351	8.63245	3.12886
38.6	2.04986	1.90041	2.59389				38.6	3.03091	8.56821	3.14767
38.8	2.05628	1.97901	2.88212				38.8	3.24528	8.74735	3.65265
39	1.86203	1.7504	2.68461				39	2.97189	8.91016	3.63214
39.2	1.92057	1.88458	3.175				39.2	2.67626	8.82847	3.48841
39.4	1.87133	1.81596	3.14145				39.4	3.13827	8.51585	3.35757
39.6	1.98671	1.72219	3.10543				39.6	3.22846	8.32416	2.97924
39.8	1.81478	1.85923	3.09097				39.8	2.95186	8.63599	3.08307
40	1.67459	1.71887	3.06613				40	3.20352	8.14716	3.06618
40.2	1.73808	1.79758	3.25591				40.2	3.61295	8.2314	3.27521
40.4	1.86351	1.93736	2.92305				40.4	3.20441	8.83077	3.19517
40.6	1.85191	1.77136	3.32662				40.6	2.92212	7.77967	3.18103
40.8	2.05141	1.76723	2.70654				40.8	3.53515	8.20334	3.41584
41	1.80834	1.729	2.7186				41	3.47311	8.23012	2.89092
41.2	1.79876	1.88593	2.68905				41.2	3.13321	8.2472	3.90667
41.4	2.01398	1.83353	2.93601				41.4	3.19649	9.06997	3.6025
41.6	1.85993	1.62914	2.96623				41.6	3.19461	8.73467	3.56352
41.8	1.62058	1.62128	2.77072				41.8	3.07719	9.00044	3.13948
42	1.74486	1.6391	3.0783				42	3.26543	8.77736	2.56537
42.2	1.85266	1.71977	2.8541				42.2	2.73867	8.91395	3.0913
42.4	1.94458	1.95859	2.96671				42.4	3.84823	8.90401	2.92686
42.6	1.9037	1.92922	3.20633				42.6	3.56572	9.10789	3.21941
42.8	1.9641	1.62013	3.34838				42.8	3.45164	8.93048	2.66011
43	2.08179	1.83479	3.15092				43	3.75124	8.75948	2.52053
43.2	1.88429	1.62009	3.48286				43.2	3.61669	9.609	3.31705
43.4	2.00574	1.74961	3.12622				43.4	3.87531	8.29108	3.36893
43.6	2.10997	1.8027	2.82637				43.6	4.34591	8.57269	3.23298
43.8	2.06556	1.7733	2.9819				43.8	4.65754	9.46941	3.56962
44	1.99932	1.77722	2.9282				44	4.21994	8.96992	3.14465
44.2	2.01162	1.73612	3.06774				44.2	4.67019	7.93578	3.47405
44.4	2.49916	1.88591	3.27044				44.4	4.48184	8.0279	2.88257
44.6	2.20925	2.16931	3.05784				44.6	5.66892	6.54004	2.86018
44.8	2.14924	2.11362	3.24378				44.8	5.41744	8.56991	2.70993
45	2.10802	1.93091	3.41318				45	5.76587	9.37644	3.0397
45.2	1.9395	1.86893	2.93809				45.2	5.69673	8.43526	3.11404
45.4	1.9145	1.97968	3.2123				45.4	6.3486	8.68746	3.37856
45.6	1.97382	1.89315	3.39868				45.6	6.62729	10.1224	3.25551
45.8	2.1285	1.76994	3.07898				45.8	6.97117	9.32873	3.05399
46	2.1667	1.78341	3.09642				46	6.57646	9.11982	2.96642
46.2	2.16514	1.76433	3.02629				46.2	6.37265	8.35234	3.10463
46.4	2.35355	1.97401	2.95422				46.4	6.98236	8.12487	3.01313
46.6	2.18966	1.98226	2.86689				46.6	6.66244	8.16813	3.35028
46.8	2.12781	2.29213	3.20757				46.8	6.68543	8.14341	3.65135
47	2.13109	1.95823	2.81597				47	6.71431	8.44663	3.43037
47.2	2.21122	1.82061	2.84622				47.2	6.64013	8.93309	3.47439
47.4	2.1794	1.8922	3.04877				47.4	7.02732	7.42133	3.16381
47.6	1.95143	1.60452	2.94013				47.6	6.75101	6.36717	2.9443
47.8	1.91172	1.61189	3.22382				47.8	7.5042	5.58244	3.29057
48	1.97649	1.62132	3.0118				48	6.36918	6.16613	3.39397
48.2	1.84799	2.07897	3.06793				48.2	7.24832	6.40547	3.47628
48.4	1.96835	1.88837	3.16509				48.4	7.37313	5.19968	3.17803
48.6	1.95811	1.82199	3.02447				48.6	6.81925	6.34777	2.9826
48.8	2.07837	1.67173	3.16173				48.8	6.61855	6.09617	3.25977
49	2.11935	1.86363	2.99175				49	7.18809	5.62514	3.10419
49.2	2.12603	1.94916	2.86604				49.2	6.94087	6.1865	3.10075
49.4	2.03037	1.70965	2.92525				49.4	6.73905	7.2431	3.69899
49.6	2.26705	1.81803	2.96905				49.6	6.40471	5.76953	3.20232
49.8	2.14129	1.78598	2.98742				49.8	6.66714	7.14161	3.34574
50	1.9513	1.89282	2.99518				50	6.65472	7.39987	3.51453
50.2	2.04725	1.70859	2.91068				50.2	6.37401	6.95651	3.19461
50.4	2.00041	1.72626	2.84053				50.4	6.78735	7.25788	2.87623
50.6	1.93921	1.73691	2.92858				50.6	6.41326	6.67156	2.89714
50.8	2.02116	2.02239	2.71082				50.8	7.10032	6.69857	3.30461
51	1.92764	2.05471	2.70704				51	6.79056	6.81271	3.33689
51.2	1.93503	2.28324	2.80471				51.2	6.4751	7.17363	2.66026
51.4	1.88515	1.97174	2.89525				51.4	6.81401	6.54671	2.73096
51.6	1.8354	2.30355	2.87277				51.6	6.02179	6.30958	2.98025
51.8	1.97272	2.08229	2.81226				51.8	6.66329	7.12082	3.73595
52	2.08413	2.01664	2.78584				52	6.64536	6.98899	3.86408
52.2	2.09184	2.18109	2.75282				52.2	6.98447	7.03055	3.09298
52.4	1.93031	2.23831	2.44129				52.4	6.77228	6.88947	3.31099
52.6	1.8211	2.19039	2.83473				52.6	6.63881	7.03152	3.73733
52.8	1.99698	2.16114	3.20889				52.8	6.82898	7.40584	3.76052
53	2.122	2.23083	3.07652				53	6.32267	7.53242	3.00399
53.2	2.07011	2.11594	2.75754				53.2	6.57967	6.45448	3.02398
53.4	2.07175	2.19542	3.01119				53.4	6.89863	7.76476	3.32812
53.6	2.00957	2.39827	3.23362				53.6	7.12691	7.29077	3.54674
53.8	1.96966	2.22133	2.90556				53.8	7.31218	7.28189	3.13344
54	2.08228	2.33552	3.06501				54	7.1928	7.69546	3.71444
54.2	1.92465	2.15432	3.28862				54.2	7.1519	6.54829	3.64303
54.4	1.90333	2.22719	2.9893				54.4	6.97135	6.2319	3.51447
54.6	1.99954	2.35709	2.99835				54.6	7.03774	6.53328	2.84288
54.8	2.08447	2.14549	2.80123				54.8	6.99369	7.06219	3.31027
55	1.89792	2.04004	3.00022				55	7.23395	7.03571	3.23167
55.2	2.00623	2.06232	3.15844				55.2	7.2639	6.07966	3.26627
55.4	2.09394	2.13641	3.18095				55.4	7.13045	7.01935	3.02058
55.6	2.16326	2.25078	2.80992				55.6	6.71375	7.87974	2.90015
55.8	2.39746	2.27451	2.78446				55.8	7.26013	7.78955	3.01432
56	2.27722	2.09073	2.81136				56	7.10781	7.41056	3.46225
56.2	2.51607	2.32393	2.84933				56.2	7.04266	6.93355	3.02841
56.4	2.41303	2.16103	3.05958				56.4	6.97658	7.45141	3.07236
56.6	2.53179	2.32028	3.13968				56.6	6.4698	8.6268	3.81758
56.8	2.37862	2.00477	2.8106				56.8	6.94877	7.73403	2.40508
57	2.24592	2.16315	2.81888				57	6.51913	7.99794	2.84843
57.2	2.30746	2.0223	3.14066				57.2	6.8562	7.44145	2.83254
57.4	2.27799	2.01009	2.89825				57.4	6.77902	7.58504	2.31151
57.6	2.41315	2.00006	2.76284				57.6	7.03287	7.95395	3.6579
57.8	2.4688	2.06559	2.95451				57.8	6.61451	7.82019	3.64108
58	2.41695	1.79764	2.64777				58	6.80825	7.44764	3.4211
58.2	2.41417	2.02934	3.04687				58.2	6.26986	7.59133	2.96882
58.4	2.62626	1.91164	2.96615				58.4	6.69571	7.31074	2.79496
58.6	2.47734	2.00338	3.01346				58.6	6.24984	7.57834	3.90314
58.8	2.59432	1.88021	2.92455				58.8	5.77464	7.31315	2.28396
59	2.60309	2.01458	2.68658				59	5.77686	7.01029	2.8859
59.2	2.63385	1.93563	2.8421				59.2	5.64592	6.88674	3.10619
59.4	2.65305	2.05898	3.03212				59.4	5.19055	7.48571	3.22486
59.6	2.58664	1.89535	2.74749				59.6	5.38632	7.47807	3.76386
59.8	2.76667	2.00499	2.85874				59.8	5.02973	7.5975	3.36467
60	2.63863	1.94217	3.02434				60	5.04605	8.03212	3.50963
60.2	2.8149	2.17164	2.69342				60.2	5.16124	7.89661	3.37463
60.4	2.43313	2.21886	2.83913				60.4	5.32614	7.68464	3.20101
60.6	2.18817	2.0204	2.87031				60.6	5.89763	7.2757	4.23848
60.8	2.37034	1.96833	2.91767				60.8	5.28374	6.61725	4.03121
61	2.37104	1.80227	3.05006				61	5.41197	7.73565	3.40234
61.2	2.38064	1.95873	2.95935				61.2	5.14519	7.37402	2.9591
61.4	2.36476	1.75931	2.7353				61.4	5.48561	7.64961	3.39025
61.6	2.26657	1.74526	2.6871				61.6	5.76848	7.1534	3.71683
61.8	2.2477	1.79003	2.30954				61.8	4.8134	7.95463	3.08406
62	2.32722	1.82752	2.45216				62	4.87513	7.74652	2.99191
62.2	2.10736	2.03935	2.47486				62.2	5.05409	7.03575	2.88551
62.4	2.13976	1.98653	2.7068				62.4	4.68491	7.20171	3.73218
62.6	2.37341	1.84016	2.99291				62.6	5.65628	6.86809	3.76086
62.8	2.42343	1.96037	2.73616				62.8	5.22801	6.95773	3.83312
63	2.2699	2.02769	2.82623				63	5.18448	6.63026	5.23757
63.2	2.21535	2.097	2.7794				63.2	5.27072	5.84486	3.27096
63.4	2.0739	1.96068	2.63942				63.4	5.61179	7.01218	3.65919
63.6	2.15887	2.44244	2.52536				63.6	5.033	7.51075	2.98967
63.8	2.31811	2.22488	2.47019				63.8	5.95888	7.25574	3.22096
64	2.20992	2.25257	2.64552				64	5.6908	8.32284	2.94981
64.2	2.01712	2.21537	2.53051				64.2	5.47685	7.47909	2.83793
64.4	2.12815	2.18873	2.66045				64.4	5.01124	7.39521	2.52824
64.6	2.05877	2.09238	2.77675				64.6	5.73692	9.24123	2.37621
64.8	2.0831	2.28902	2.61088				64.8	5.008	9.54093	2.7019
65	2.17098	2.30365	2.87096				65	4.9757	8.06875	2.73627
65.2	2.05763	2.09341	2.75702				65.2	4.9557	6.95476	2.87933
65.4	1.92007	1.87985	2.50478				65.4	5.1284	6.93481	2.90483
65.6	2.07758	2.00117	2.35801				65.6	5.15332	7.16072	2.62537
65.8	2.09421	1.98662	2.59997				65.8	5.52489	6.82771	2.64194
66	2.12248	1.99589	2.54591				66	6.15694	7.72778	3.29495
66.2	2.1802	2.00261	2.55805				66.2	5.7134	8.04404	3.03628
66.4	2.10808	1.91944	2.6246				66.4	5.93779	7.92799	2.98579
66.6	2.17411	2.06758	2.57815				66.6	5.6911	8.24573	3.06646
66.8	2.06012	2.04837	2.88025				66.8	5.20488	8.77202	3.03402
67	2.23857	2.14622	2.99109				67	5.48435	8.43367	2.80832
67.2	2.17315	2.09067	2.5729				67.2	5.28471	8.53811	3.02055
67.4	2.16691	1.8478	2.61666				67.4	5.34659	7.57019	3.23493
67.6	2.1711	1.78448	2.73969				67.6	4.99472	8.35986	3.24836
67.8	2.19299	1.78973	2.85321				67.8	5.56028	8.3332	3.20884
68	2.23248	1.80297	2.5784				68	5.04727	8.35053	3.22618
68.2	2.34908	1.92097	2.62226				68.2	5.48585	7.29083	2.75046
68.4	2.242	1.77789	2.64489				68.4	6.24374	7.88292	3.06264
68.6	2.54477	1.93129	2.95862				68.6	6.60881	6.87109	3.23014
68.8	2.48045	1.83578	2.49949				68.8	5.98112	7.23086	3.42727
69	2.54512	1.87387	2.68701				69	5.7389	7.0306	2.92937
69.2	2.56469	2.01542	2.57995				69.2	6.16444	7.44226	2.78566
69.4	2.44937	1.80057	2.70541				69.4	5.52284	7.52489	3.36507
69.6	2.63438	1.79926	2.84067				69.6	5.59212	7.11703	3.05631
69.8	2.53993	2.18687	2.81148				69.8	4.88337	7.48574	2.73476
70	2.37204	1.92223	3.21125				70	5.1413	7.08666	2.92397
70.2	2.23934	1.91949	2.70419				70.2	5.4615	7.69452	2.97214
70.4	2.43658	2.11043	2.44523				70.4	6.12752	7.31382	2.76652
70.6	2.28982	2.18089	2.36304				70.6	6.81096	7.46048	2.59842
70.8	2.38242	2.20178	2.5736				70.8	5.66028	7.7451	3.02539
71	2.5032	2.30692	2.80867				71	6.08786	6.93075	3.01224
71.2	2.32539	2.08066	2.56885				71.2	5.88902	6.06008	2.84387
71.4	2.12291	2.32868	2.65318				71.4	5.3745	6.49893	2.83472
71.6	2.23492	2.22216	2.83442				71.6	6.28006	6.64121	2.91141
71.8	2.35635	2.12743	2.77296				71.8	6.05788	7.1653	2.61613
72	2.42547	2.06646	2.70788				72	5.79956	6.73707	2.89568
72.2	2.63318	2.08669	2.88565				72.2	5.32805	6.77315	2.90239
72.4	2.44756	2.15605	2.77111				72.4	5.81352	6.98116	3.06819
72.6	2.53408	2.17838	2.77753				72.6	5.56132	7.73221	2.77364
72.8	2.37945	1.96632	2.82295				72.8	5.38203	8.67479	2.95915
73	2.27153	2.20735	2.63126				73	5.09059	8.57377	2.77961
73.2	2.27977	1.77114	2.71252				73.2	4.94499	7.70293	2.70882
73.4	2.42803	1.89294	3.00608				73.4	5.47928	8.16618	3.40295
73.6	2.21718	2.36726	2.96726				73.6	5.07564	7.18153	3.08034
73.8	2.19896	2.52605	2.60897				73.8	5.90796	7.25118	2.78616
74	2.17375	2.24174	2.68858				74	5.2217	11.3697	2.79477
74.2	2.10071	2.27194	2.80648				74.2	5.58195	7.10225	2.76182
74.4	2.13919	2.26423	2.86183				74.4	5.79188	6.94541	2.56947
74.6	2.32655	2.08334	2.80854				74.6	5.09157	7.0431	2.65218
74.8	2.302	2.03131	3.0194				74.8	4.81279	6.61177	2.94889
75	2.0807	1.85212	3.09477				75	5.03673	5.83495	3.10994
75.2	2.39859	2.00021	2.84463				75.2	5.52587	5.172	2.83787
75.4	2.3092	1.79987	2.78336				75.4	5.36765	4.81089	3.11356
75.6	2.16735	1.95191	2.84885				75.6	5.5617	4.91519	3.41499
75.8	2.12383	2.02495	2.65289				75.8	5.2069	5.56593	3.26895
76	2.12652	2.18213	2.51358				76	5.55301	5.35904	3.68487
76.2	2.04863	2.06447	2.76322				76.2	5.54903	5.18593	3.37249
76.4	2.0888	2.12828	2.80566				76.4	5.48492	5.91846	2.666
76.6	2.15375	2.02458	2.64819				76.6	5.22401	5.50048	2.90207
76.8	1.8898	2.07441	2.65687				76.8	5.38693	5.65333	2.57854
77	1.92222	1.88859	2.39598				77	4.94501	5.83356	2.78187
77.2	2.14965	1.8469	2.65336				77.2	5.56772	6.07225	2.96819
77.4	2.25035	1.79157	2.60477				77.4	5.5881	5.97641	2.88373
77.6	2.02731	1.8019	3.00828				77.6	5.68498	6.55897	2.11361
77.8	2.17745	1.84011	2.97526				77.8	5.54006	5.86214	2.24404
78	2.25207	1.89167	2.68379				78	5.3317	5.83933	1.86445
78.2	2.11914	1.95603	2.68183				78.2	5.73076	5.92126	2.21931
78.4	2.15894	1.78573	2.32986				78.4	6.11022	5.40948	2.17139
78.6	2.29192	1.92711	2.67009				78.6	5.83399	5.08018	2.81779
78.8	2.12877	2.01252	2.52311				78.8	5.4027	5.27403	3.08762
79	2.22005	2.28031	2.96707				79	6.23197	5.68761	3.43425
79.2	2.24639	2.05722	2.51271				79.2	5.99284	5.86562	3.01983
79.4	2.33257	2.00788	2.64942				79.4	5.27244	5.29108	2.71515
79.6	2.25025	2.05372	2.41579				79.6	5.55209	5.52018	3.09001
79.8	2.1619	1.94535	2.41079				79.8	5.82287	5.26574	3.09831
80	2.15597	2.00184	2.38761				80	6.03713	5.3353	2.85648
80.2	2.19702	2.01084	2.11461				80.2	5.26444	5.44577	2.88783
80.4	2.49703	2.02573	2.16597				80.4	4.83017	5.57238	3.51678
80.6	2.45341	1.99794	2.16619				80.6	5.74113	5.50543	3.07952
80.8	2.31991	2.2566	2.38793				80.8	4.52275	6.32378	3.21984
81	2.32327	1.91563	2.32723				81	5.15133	5.66087	3.67688
81.2	2.34863	1.7844	2.44308				81.2	5.06918	6.76387	3.43014
81.4	2.20474	1.85388	2.19951				81.4	4.61185	6.51982	4.05485
81.6	2.22384	1.84068	2.48554				81.6	5.15918	6.56484	3.17901
81.8	2.34957	1.826	2.4037				81.8	5.40388	6.60817	2.73332
82	2.16254	1.77169	2.30544				82	5.12164	5.90244	2.59536
82.2	2.58068	1.87049	2.41739				82.2	4.73624	6.43801	3.02755
82.4	2.27488	2.11427	2.54402				82.4	4.99444	6.87772	2.69283
82.6	2.58781	1.80281	2.4161				82.6	5.40096	6.24136	2.95957
82.8	2.56406	1.81879	2.48564				82.8	5.21628	6.17938	3.32162
83	2.63754	1.97408	2.4884				83	5.07116	5.96895	3.01217
83.2	2.4936	1.87505	2.49763				83.2	5.24935	5.48464	2.28059
83.4	2.68514	1.7531	2.5917				83.4	5.22718	5.64496	2.8959
83.6	2.88598	1.99517	2.21979				83.6	5.36435	5.97758	3.13003
83.8	2.93283	1.93706	2.47759				83.8	5.40738	6.27327	3.3832
84	3.04827	1.86457	2.07793				84	5.40401	6.34233	3.32178
84.2	2.70624	1.86564	2.15455				84.2	6.05512	6.26776	3.15034
84.4	2.65577	1.81677	2.35841				84.4	4.87799	5.75753	3.70927
84.6	2.50614	1.8686	2.36881				84.6	5.10759	5.4039	3.06031
84.8	2.65335	1.81026	2.19082				84.8	4.87018	5.32929	4.04527
85	2.74517	1.7727	2.1751				85	5.26238	5.70421	3.24877
85.2	2.7143	2.1284	2.32777				85.2	5.35284	5.94329	2.8047
85.4	2.71098	1.82158	2.19283				85.4	5.28104	5.54458	3.47415
85.6	2.52607	1.9679	2.61477				85.6	4.83678	5.38559	3.37562
85.8	2.64438	1.79565	2.56054				85.8	4.80258	5.22187	2.71067
86	2.6722	1.90413	2.68102				86	5.30773	5.5028	3.08188
86.2	2.53148	1.85618	2.54327				86.2	5.10712	5.99722	3.10372
86.4	2.56913	1.97792	2.34354				86.4	4.40567	6.18555	3.18527
86.6	2.49628	1.75804	2.39017				86.6	4.99394	5.38581	3.43571
86.8	2.43726	1.89049	2.26941				86.8	4.91751	5.58166	3.2759
87	2.58241	1.8636	2.58275				87	4.90532	5.09175	3.00863
87.2	2.55147	1.87735	2.51418				87.2	5.01268	5.88196	3.12181
87.4	2.57135	1.8959	2.59032				87.4	4.89332	4.65399	3.30089
87.6	2.37906	1.89216	2.76005				87.6	5.1742	4.27231	3.51348
87.8	2.40342	1.84237	2.77768				87.8	5.08219	4.59769	3.30609
88	2.34412	1.78706	2.92				88	5.45325	4.05412	3.64641
88.2	2.45019	1.96362	2.77045				88.2	5.26757	3.58773	2.82616
88.4	2.50138	1.76604	3.06006				88.4	4.95907	3.3952	3.58167
88.6	2.496	1.85982	3.15008				88.6	4.61048	3.48317	3.15718
88.8	2.58563	1.89493	3.30074				88.8	4.8136	3.72257	3.33252
89	2.52111	1.83828	2.95812				89	5.20125	3.75742	3.11399
89.2	2.32252	1.74736	3.06697				89.2	4.39536	3.49143	3.1492
89.4	2.71755	1.81393	3.07342				89.4	4.69903	3.55997	3.19049
89.6	2.64723	2.00655	3.21194				89.6	5.1055	3.85028	2.98904
89.8	2.68974	1.75777	3.52112				89.8	5.4585	3.45545	3.1669
90	2.44307	1.90843	3.21787				90	5.33435	3.79836	3.17403
90.2	2.53727	1.98192	3.27383				90.2	5.87756	3.58584	3.54984
90.4	2.53382	1.8515	3.37595				90.4	4.74335	3.95792	3.62599
90.6	2.54366	1.89619	3.12718				90.6	4.56002	3.78722	2.9121
90.8	2.42103	2.00837	3.27846				90.8	4.61447	4.84903	3.26552
91	2.41609	1.90829	3.64609				91	5.53087	4.0652	3.47231
91.2	2.2411	1.93965	3.41875				91.2	4.9193	5.03603	3.57975
91.4	2.34134	1.96686	3.33578				91.4	5.52581	5.62765	2.73261
91.6	2.49826	1.98792	3.39349				91.6	5.27637	5.38525	3.5011
91.8	2.48189	1.9021	3.39617				91.8	6.20657	5.32568	3.04385
92	2.33427	1.89039	3.46937				92	6.14766	5.53514	3.4494
92.2	2.28227	1.94392	3.73683				92.2	5.6701	5.40265	2.64593
92.4	2.25649	2.00485	3.84284				92.4	6.30422	5.2594	1.9381
92.6	2.43726	2.01896	3.53853				92.6	6.17835	5.65294	1.96722
92.8	2.47519	1.94784	3.29488				92.8	6.0045	5.5008	1.90398
93	2.47124	1.93249	3.28959				93	5.81075	5.54807	2.04043
93.2	2.66216	1.89101	3.38465				93.2	6.39866	4.86466	2.03627
93.4	2.69706	2.02857	3.50074				93.4	5.97968	6.04561	2.21271
93.6	2.725	1.98864	3.34278				93.6	6.4406	5.34807	1.87605
93.8	2.77153	2.16998	3.38689				93.8	5.65812	5.38941	1.94405
94	2.67122	2.0568	3.15173				94	5.54735	5.41446	2.04733
94.2	2.51245	2.18917	3.04375				94.2	5.89244	5.97213	2.22393
94.4	2.30501	2.07802	3.24668				94.4	6.1228	5.29936	2.26851
94.6	2.31763	2.02528	3.0362				94.6	5.75243	5.51557	2.1802
94.8	2.56671	2.34966	3.2489				94.8	6.54653	5.53372	2.32108
95	2.56061	2.22309	3.08255				95	5.68964	5.57171	2.24208
95.2	2.57221	2.37904	2.91933				95.2	5.96454	5.55095	2.06891
95.4	2.46425	2.28677	3.27122				95.4	5.98039	6.28237	1.91016
95.6	2.64902	2.01208	3.18092				95.6	6.1138	5.53767	1.91187
95.8	2.26512	2.36705	3.28727				95.8	5.86319	6.2369	1.76711
96	2.44117	2.16794	2.98656				96	5.80356	5.63899	2.31932
96.2	2.44435	2.36735	2.96647				96.2	5.26777	6.45861	2.39045
96.4	2.34667	2.09552	2.9589				96.4	5.75311	6.34376	1.97029
96.6	2.58926	2.34505	3.40716				96.6	5.97122	5.74344	1.98793
96.8	2.33234	2.13006	3.23955				96.8	6.00853	6.17175	1.71673
97	2.34541	2.26833	3.28086				97	5.58813	6.01428	2.47041
97.2	2.78078	2.35896	3.05274				97.2	6.02621	5.60135	2.02295
97.4	2.44253	2.08915	2.92356				97.4	6.00751	7.50074	1.58739
97.6	2.50906	2.22091	3.10781				97.6	5.6743	7.35514	1.7129
97.8	2.8147	2.0473	3.17954				97.8	6.52172	7.75623	2.1382
98	2.81309	2.02432	2.94262				98	5.72975	6.77227	2.15528
98.2	2.92718	1.96324	3.05517				98.2	5.71715	7.38909	1.78213
98.4	2.81965	2.10313	2.96614				98.4	5.92121	9.10184	1.78014
98.6	2.7159	1.99983	3.2421				98.6	5.6138	7.23765	2.04785
98.8	2.64878	1.98327	3.12135				98.8	5.49405	7.95102	1.6564
99	2.74879	1.95724	2.93546				99	5.30814	7.72537	1.6655
99.2	2.66514	2.05933	3.04601				99.2	5.6845	7.87154	1.94524
99.4	2.74295	1.95208	3.27881				99.4	5.71833	7.80447	2.21199
99.6	2.99672	1.92913	3.12918				99.6	5.43139	6.88778	2.47138
99.8	2.68621	1.84767	3.41049				99.8	6.00312	5.96657	2.69517
100	2.71864	1.98926	3.34071				100	6.09216	6.18787	1.82279
100.2	2.71142	1.8937	3.58797				100.2	6.08586	6.85413	1.53856
100.4	2.98494	2.04654	3.84528				100.4	5.74853	6.0571	2.04571
100.6	2.95632	1.99256	3.53978				100.6	6.31166	7.13217	2.49421
100.8	2.85646	2.13395	3.37403				100.8	6.48819	6.86087	2.01171
101	2.89143	2.16138	3.26864				101	6.34659	6.7798	1.99293
101.2	2.7077	2.10051	3.14598				101.2	6.3638	6.96433	2.07127
101.4	2.79927	2.22458	2.95625				101.4	5.82396	5.72856	1.70899
101.6	2.96918	2.2882	3.20221				101.6	5.43933	5.94838	2.52599
101.8	3.02946	2.17283	3.26603				101.8	6.02433	7.40371	1.39695
102	2.87802	2.17901	3.00397				102	5.80715	7.11618	1.42911
102.2	2.92225	2.07768	3.07742				102.2	5.31922	5.90206	1.61066
102.4	2.73145	2.2141	3.37006				102.4	6.13163	6.43487	2.20368
102.6	2.85966	2.0487	3.60472				102.6	5.78225	5.96884	2.41733
102.8	2.97787	2.2466	3.48481				102.8	5.66389	7.38752	2.8302
103	2.75405	2.4589	3.59125				103	6.18172	6.06659	1.99311
103.2	2.84013	2.48982	3.39295				103.2	5.94833	5.44981	1.98985
103.4	2.8215	2.18423	3.7492				103.4	5.99647	5.91705	1.90883
103.6	3.01744	2.19441	3.43941				103.6	5.09967	5.40055	1.82111
103.8	2.97953	2.31699	3.59383				103.8	6.46368	5.67586	1.73795
104	2.76437	2.26392	3.00188				104	6.24032	6.89913	2.69504
104.2	2.83783	2.19126	2.92085				104.2	6.09494	6.32339	2.2339
104.4	2.92124	2.30842	2.70616				104.4	6.44997	6.77695	2.24577
104.6	2.68159	2.28975	2.89454				104.6	6.27786	6.46702	1.73508
104.8	2.75434	2.2319	2.97797				104.8	6.36457	6.49761	2.11173
105	2.72995	2.3613	3.34473				105	5.91708	7.20068	1.89916
105.2	2.54987	2.29333	3.48606				105.2	6.26958	6.63637	2.11243
105.4	2.73686	2.08748	3.08381				105.4	6.00933	6.64488	1.80593
105.6	2.73589	2.07376	2.86068				105.6	6.71693	5.52863	1.86271
105.8	2.91717	1.96386	3.18176				105.8	6.52754	5.70779	2.10847
106	2.83826	2.35897	3.20537				106	5.82987	6.67368	1.77063
106.2	2.76707	2.21882	3.37016				106.2	5.36658	6.00948	1.59748
106.4	2.78007	2.26984	3.30518				106.4	6.26725	6.047	1.55594
106.6	2.84217	2.26993	3.25554				106.6	6.65913	6.7784	1.69205
106.8	2.72353	2.21753	3.06826				106.8	6.56941	5.90991	1.68245
107	2.90305	2.17771	3.29542				107	6.78482	5.15085	3.08239
107.2	2.63201	2.3973	3.21646				107.2	6.50033	5.3494	1.43888
107.4	2.73698	2.28523	2.90018				107.4	7.59382	5.06645	2.11055
107.6	2.63777	2.33557	3.11393				107.6	8.60924	5.09594	2.63498
107.8	2.7339	2.53397	3.28028				107.8	8.78547	5.42172	3.1614
108	2.80024	2.26033	3.07578				108	8.55778	5.76778	2.99924
108.2	2.6081	2.17455	2.71798				108.2	9.44455	5.33839	2.10293
108.4	2.45063	2.24542	3.32583				108.4	9.89506	4.74272	3.55235
108.6	2.43049	2.47661	3.1883				108.6	9.24647	6.12184	2.57932
108.8	2.68922	2.42453	3.35768				108.8	10.0452	6.88405	3.02627
109	2.60986	2.17248	3.21699				109	8.69133	6.86035	2.0051
109.2	2.50674	1.97802	3.69213				109.2	9.7739	5.67757	2.62585
109.4	2.57377	2.1562	3.55385				109.4	9.54512	5.43822	3.34141
109.6	2.43187	2.18639	3.37938				109.6	9.08592	5.48798	2.36664
109.8	2.51817	2.44324	3.39483				109.8	7.73766	5.71368	2.31941
110	2.5348	2.65575	3.0642				110	7.759	5.53688	2.38575
110.2	2.34735	2.24743	2.98538				110.2	5.29197	4.74141	2.54703
110.4	2.37929	2.46742	3.08848				110.4	4.41767	5.50306	3.07899
110.6	2.41734	2.36359	3.02693				110.6	4.71987	4.82034	2.69663
110.8	2.48237	2.29086	3.48525				110.8	4.21063	4.21368	3.52847
111	2.52209	2.05301	3.44702				111	4.62413	3.96306	2.65859
111.2	2.28366	2.20678	3.36867				111.2	5.78923	4.16517	3.12337
111.4	2.4289	2.32331	3.17883				111.4	4.63596	4.65273	3.04364
111.6	2.40481	2.10375	3.03335				111.6	5.53611	4.73119	2.37539
111.8	2.54211	2.05541	3.3154				111.8	5.10313	4.25988	2.24412
112	2.37798	2.07021	3.164				112	5.93205	4.58518	3.04164
112.2	2.54729	2.22073	3.29117				112.2	4.24748	3.89899	2.18678
112.4	2.44915	2.16581	3.20008				112.4	4.96582	3.97344	2.35344
112.6	2.34863	2.11872	3.06327				112.6	5.20494	4.34831	2.79606
112.8	2.67052	2.00252	3.08491				112.8	4.85572	4.5593	3.79351
113	2.26622	1.99728	2.95476				113	4.56146	4.90348	4.37508
113.2	2.4135	2.03838	2.98135				113.2	4.2977	5.15605	3.59821
113.4	2.61409	1.89649	3.21546				113.4	5.29144	4.43463	3.76184
113.6	2.24085	1.92263	3.45293				113.6	4.11377	4.73362	4.88993
113.8	2.4149	1.76749	2.96369				113.8	4.78838	3.69541	4.13397
114	2.34196	1.85052	3.32805				114	4.17084	3.0096	4.96241
114.2	2.5618	1.87431	3.23186				114.2	4.65317	2.63654	4.34957
114.4	2.31523	2.03404	3.07364				114.4	5.00249	3.60947	4.30422
114.6	2.26643	2.13401	3.39749				114.6	4.49614	4.36521	4.45856
114.8	2.27978	1.99201	3.18532				114.8	4.59419	3.47183	5.00549
115	2.61832	1.95681	3.09585				115	5.48238	2.8758	4.23543
115.2	2.23203	1.89551	3.02506				115.2	5.00173	3.37761	4.48937
115.4	2.33376	2.07431	3.0522				115.4	4.89314	3.38651	4.71994
115.6	2.59769	2.22245	2.98051				115.6	4.95492	3.23539	5.19103
115.8	2.61885	1.91647	2.92121				115.8	5.0734	2.2034	4.60823
116	2.53792	2.15941	3.15432				116	5.44106	2.96024	4.48025
116.2	2.41377	1.95627	2.80122				116.2	4.40048	2.93897	3.95214
116.4	2.42294	2.07004	2.86531				116.4	4.57636	3.37199	4.41943
116.6	2.61024	1.9508	3.1765				116.6	4.3699	2.55953	4.10167
116.8	2.58525	2.10688	3.25717				116.8	4.303	3.01735	5.00798
117	2.50544	1.74192	3.11142				117	4.43824	2.24364	4.44052
117.2	2.38518	1.80983	2.82424				117.2	4.46171	2.47883	4.37874
117.4	2.51149	1.79052	3.07453				117.4	4.45996	2.35057	4.69399
117.6	2.27612	1.89642	3.04565				117.6	4.72824	2.16891	4.55098
117.8	2.65008	1.93573	2.98065				117.8	5.09264	2.15413	4.67808
118	2.30433	1.95977	2.92036				118	5.13334	2.57055	4.55069
118.2	2.58783	1.92123	3.01574				118.2	5.3072	3.0173	4.48806
118.4	2.51743	1.99736	2.7246				118.4	4.89416	2.68943	4.08961
118.6	2.68239	1.91512	2.85893				118.6	4.75107	2.82263	3.96128
118.8	2.59902	1.85454	3.21185				118.8	4.04	3.47975	3.82664
119	2.3038	1.92946	3.09336				119	4.23639	3.02782	4.30083
119.2	2.23587	1.76859	2.93805				119.2	4.42376	2.87198	4.02788
119.4	2.03829	1.89062	2.96976				119.4	4.06982	2.91229	4.63992
119.6	2.04681	1.82834	3.12494				119.6	4.16764	3.14978	4.34215
119.8	2.25349	1.73677	3.10768				119.8	3.83303	3.09127	4.291
120	2.42032	1.83437	3.20321				120	4.58964	3.85899	4.13946
120.2	2.08266	1.99232	2.9688				120.2	4.13076	2.79642	4.44105
120.4	2.38375	2.0572	2.66524				120.4	4.29507	2.93231	4.80856
120.6	2.26674	1.86872	2.89065				120.6	4.36918	2.99656	4.16693
120.8	2.0629	1.96323	3.07646				120.8	4.00613	3.17514	3.94949
121	2.2096	1.70884	3.50111				121	4.57271	2.91434	4.14745
121.2	2.18215	1.75186	3.19534				121.2	4.09258	3.05242	4.28691
121.4	2.09451	1.80745	3.09795				121.4	4.46336	2.76686	3.98592
121.6	2.2053	1.79864	3.29531				121.6	4.07218	3.10465	4.08366
121.8	2.32996	1.86375	3.22358				121.8	4.4395	2.90495	4.12299
122	2.14733	1.96586	3.34132				122	4.73368	2.89537	4.33812
122.2	2.39697	1.81836	3.15393				122.2	4.5051	2.69548	4.60053
122.4	2.39067	1.91391	3.31672				122.4	4.79934	2.70044	4.52067
122.6	2.43392	1.8357	3.26076				122.6	4.86403	2.91433	4.31497
122.8	2.35107	1.90929	2.97942				122.8	4.68352	3.05362	4.72379
123	2.42625	1.88405	2.99524				123	4.7448	3.04024	4.16864
123.2	2.04785	1.89687	3.11901				123.2	4.29224	3.3668	4.4132
123.4	2.11615	2.01352	3.06619				123.4	3.95752	3.1442	4.64956
123.6	2.08697	1.96177	3.25772				123.6	4.30248	3.05543	4.55399
123.8	2.28886	1.94344	3.37205				123.8	5.03654	3.32438	4.26552
124	2.39395	1.76882	3.17815				124	5.15819	3.52063	4.45069
124.2	2.26508	1.7859	2.84403				124.2	5.05076	2.69343	4.29538
124.4	2.20389	1.90966	2.91823				124.4	5.57535	2.46952	4.62307
124.6	2.52117	1.87515	3.10299				124.6	4.22046	2.96192	4.20091
124.8	2.47066	1.67126	3.14314				124.8	6.14896	2.78454	4.23713
125	2.42598	1.69667	3.31744				125	6.57832	2.80507	4.43271
125.2	2.40256	1.89126	3.52162				125.2	6.54849	3.29582	4.14175
125.4	2.41686	1.74468	3.25314				125.4	6.28446	3.20381	4.04662
125.6	2.35118	1.83219	3.05933				125.6	7.15111	2.66101	4.32293
125.8	2.32474	1.90384	3.52192				125.8	6.90036	2.77718	4.3523
126	2.5934	2.08796	2.91631				126	6.90289	2.98444	4.46879
126.2	2.25536	1.82771	3.03367				126.2	7.89232	2.48028	4.36855
126.4	2.32809	1.96779	2.79127				126.4	6.42958	2.74393	4.35545
126.6	2.53791	2.04289	2.97686				126.6	6.17983	2.6325	3.91259
126.8	2.47691	1.97632	2.79912				126.8	6.43089	2.51779	3.79285
127	2.82465	1.8129	3.12718				127	7.29034	2.8121	4.08149
127.2	2.64363	1.96018	2.93245				127.2	7.00118	2.56622	4.25397
127.4	2.69581	1.87667	3.10167				127.4	7.57981	2.4386	4.12277
127.6	2.472	1.76924	3.03159				127.6	7.21363	3.13273	3.87923
127.8	2.48423	1.8984	2.89943				127.8	7.0705	2.10494	3.35023
128	2.55438	1.89522	3.08655				128	8.47669	2.74282	4.13761
128.2	2.71829	1.78783	3.03285				128.2	6.54232	2.709	3.86881
128.4	2.60655	1.93839	2.82651				128.4	7.11525	2.62444	4.96232
128.6	2.73734	1.99862	2.72219				128.6	6.63878	2.22263	4.74547
128.8	2.79131	1.81115	2.9355				128.8	7.09521	2.87263	5.13969
129	2.78523	1.76146	2.85611				129	7.10599	2.67875	6.60295
129.2	2.70954	1.85677	3.03237				129.2	7.63651	2.67724	5.12451
129.4	2.56798	1.72328	3.21191				129.4	6.07617	2.49541	6.43704
129.6	2.78086	1.77871	2.82405				129.6	6.57775	2.59207	5.50221
129.8	2.65039	1.91404	3.1541				129.8	6.27619	2.61701	4.81219
130	2.94448	1.91779	3.31266				130	6.5883	3.06338	4.8699
130.2	3.02422	1.86321	3.16732				130.2	5.77754	2.18257	5.46342
130.4	2.96755	2.00072	2.98614				130.4	5.7617	2.56628	4.83764
130.6	2.86741	1.77538	2.9828				130.6	6.5894	2.36777	5.4957
130.8	3.2468	1.96786	3.22138				130.8	7.20224	2.90468	5.43142
131	3.14619	1.88684	3.00599				131	6.77909	2.79439	5.48897
131.2	2.87266	1.9914	3.09449				131.2	6.72587	3.37011	5.42052
131.4	2.95185	1.76678	3.29639				131.4	6.99935	3.15234	5.384
131.6	2.73294	1.87397	3.34684				131.6	6.77758	3.60346	5.70259
131.8	2.6646	1.94729	2.95985				131.8	6.14243	3.34357	4.55956
132	2.53968	1.88167	3.10974				132	5.9618	2.91058	4.67496
132.2	2.49573	1.91749	3.06483				132.2	5.90889	3.42965	4.67
132.4	2.40116	1.84789	3.10184				132.4	5.93717	3.41501	4.5358
132.6	2.71058	1.84947	3.14489				132.6	6.32154	3.77323	5.00101
132.8	2.50836	1.63908	3.41932				132.8	6.17637	3.38929	5.12392
133	2.66396	1.64616	3.38639				133	6.31609	3.60007	4.7016
133.2	2.60066	1.66314	3.10274				133.2	6.06683	2.98658	4.67259
133.4	2.88165	1.66004	3.42615				133.4	5.38021	3.44873	4.60201
133.6	2.72138	1.95877	3.19693				133.6	6.08661	3.36169	4.61373
133.8	2.70922	1.66123	3.23587				133.8	6.42249	3.38608	5.08677
134	2.77476	1.68748	3.306				134	8.58377	3.34086	5.74138
134.2	2.90598	1.65963	3.39655				134.2	8.73998	3.00904	5.08028
134.4	2.98982	1.69172	3.43465				134.4	7.52624	3.10901	5.96488
134.6	2.92089	1.70793	3.42501				134.6	7.99596	3.41126	6.23651
134.8	2.84099	1.75879	3.62257				134.8	7.99443	3.26024	6.43329
135	2.8225	1.61024	3.38517				135	7.31628	3.64648	7.09645
135.2	2.73544	1.63829	3.73516				135.2	7.02049	3.57295	6.89429
135.4	2.66935	1.44079	3.62812				135.4	6.5592	3.40755	7.23871
135.6	2.54983	1.47796	3.48047				135.6	6.85259	3.84029	6.65229
135.8	2.59731	1.44229	3.76002				135.8	6.06428	3.91915	6.12558
136	2.43345	1.60604	3.85462				136	6.23308	3.77708	7.33096
136.2	2.57019	1.64618	3.59869				136.2	6.0792	3.56075	6.77292
136.4	2.79642	1.88893	3.6207				136.4	7.27328	3.30469	6.89602
136.6	2.69714	1.62707	3.54427				136.6	7.24909	3.7061	6.95632
136.8	2.47606	1.51658	3.70055				136.8	7.49879	3.29611	7.01425
137	2.67247	1.50402	3.92622				137	7.37998	3.38881	8.26823
137.2	2.8143	1.70801	3.6444				137.2	7.71076	3.50824	8.72557
137.4	2.73274	1.85237	3.88879				137.4	6.97347	3.49146	8.34339
137.6	2.68103	1.61859	3.975				137.6	6.80802	3.42643	7.82586
137.8	2.70026	1.88328	3.82267				137.8	6.73431	3.29312	8.30716
138	2.67796	1.90072	4.05393				138	7.11279	3.43983	8.94147
138.2	2.62946	1.86148	3.8067				138.2	7.02825	3.01155	9.18295
138.4	2.70183	1.60945	3.66327				138.4	7.27249	3.33382	8.9907
138.6	2.85157	1.58625	3.35793				138.6	6.52193	3.56857	9.10584
138.8	2.46715	1.68874	3.55265				138.8	6.69029	3.65714	8.8634
139	2.79565	1.87096	3.64912				139	7.3676	3.07902	9.59989
139.2	2.94988	1.81044	3.27494				139.2	6.27424	3.20118	9.63917
139.4	2.67247	1.8703	3.5517				139.4	6.42473	3.38822	8.81862
139.6	2.53189	1.83616	3.51947				139.6	6.3818	3.63889	8.91518
139.8	2.43034	1.75247	3.72382				139.8	5.73838	3.10829	8.9912
140	2.41199	1.56358	3.46309				140	5.74434	3.41776	9.00725
140.2	2.56246	1.56405	3.445				140.2	5.64039	3.487	9.76881
140.4	2.55503	1.81377	3.3175				140.4	5.49714	3.37648	9.93059
140.6	2.63394	1.71786	3.20891				140.6	5.64032	3.011	9.4328
140.8	2.458	1.49444	3.16515				140.8	5.74839	3.26406	9.70409
141	2.72839	1.70912	3.33344				141	6.23013	3.67117	9.671
141.2	2.64376	1.70663	3.15182				141.2	5.70667	3.47449	9.51227
141.4	2.5829	1.57808	3.20783				141.4	6.81776	3.4047	9.67157
141.6	2.59916	1.6026	3.25494				141.6	6.24668	3.70735	9.08184
141.8	2.62294	1.48564	3.26076				141.8	5.88282	3.5985	9.72195
142	2.81819	1.67052	3.31913				142	5.75269	3.60872	10.1572
142.2	2.62904	1.58198	3.36872				142.2	6.05392	3.53529	9.25378
142.4	2.47363	1.40105	3.23878				142.4	6.61481	3.87656	8.9586
142.6	2.61077	1.51529	3.2337				142.6	6.78693	3.6567	9.52756
142.8	2.51336	1.61165	3.33417				142.8	6.65553	3.38837	9.99528
143	2.53804	1.47248	3.29048				143	6.75709	3.51248	10.5602
143.2	2.64688	1.64924	3.15343				143.2	6.65109	3.43051	9.27803
143.4	2.69328	1.46054	3.47662				143.4	6.3939	3.42816	9.17742
143.6	2.67518	1.60595	3.32937				143.6	6.86213	3.12544	8.31247
143.8	2.56031	1.35159	3.15374				143.8	6.90462	3.10666	9.21669
144	2.50615	1.68615	3.23096				144	6.5535	3.4833	9.63792
144.2	2.71458	1.80556	3.35204				144.2	7.07996	3.87846	9.24118
144.4	2.6216	1.6484	3.1653				144.4	6.99951	3.56409	8.86943
144.6	2.83151	1.62749	3.03436				144.6	6.76815	3.46092	9.00731
144.8	2.68101	1.5245	3.10673				144.8	6.40557	4.22548	8.69365
145	2.57087	1.50784	2.97235				145	6.2217	4.52439	9.13389
145.2	2.82018	1.52862	3.12473				145.2	7.3661	3.77314	9.67269
145.4	2.63714	1.68464	3.35649				145.4	7.1319	3.34453	8.60404
145.6	2.69486	1.76802	3.41638				145.6	6.67695	3.23391	9.88461
145.8	2.59903	1.6374	3.23499				145.8	7.01774	3.59815	9.89345
146	2.62001	1.51305	3.17985				146	7.09775	3.6919	9.07819
146.2	2.60499	1.51438	3.10574				146.2	7.47052	4.12629	9.00556
146.4	2.66096	1.82979	2.90203				146.4	6.54632	3.16853	9.4721
146.6	2.58685	1.81671	2.85089				146.6	6.73513	3.3232	8.50091
146.8	2.54618	1.56259	2.67493				146.8	5.86314	3.3339	9.09656
147	2.63134	1.70449	2.83759				147	5.75053	3.55279	8.75213
147.2	2.59822	1.66205	2.85329				147.2	7.43306	3.63906	9.15033
147.4	2.44526	1.71459	2.75446				147.4	6.90223	3.37789	9.93833
147.6	2.48742	1.78812	2.77718				147.6	5.91169	3.17384	10.4783
147.8	2.49699	1.83868	2.81568				147.8	6.28978	3.52411	9.33409
148	2.55022	1.95725	2.74355				148	6.26689	3.5804	9.75666
148.2	2.4689	2.00998	2.64039				148.2	7.1944	3.18293	9.73473
148.4	2.39421	2.11603	2.6941				148.4	6.33566	3.44894	8.89627
148.6	2.52706	2.07077	2.7215				148.6	6.68786	3.32111	8.70655
148.8	2.44144	2.08114	2.62205				148.8	5.57514	3.47541	8.42309
149	2.56236	2.35747	2.8197				149	5.75633	3.17811	9.04222
149.2	2.66393	2.4052	3.00833				149.2	5.37623	3.30523	9.71326
149.4	2.60697	2.25889	2.9115				149.4	6.88743	3.63015	9.42731
149.6	2.44024	2.32107	3.04583				149.6	6.1231	4.1227	9.222
149.8	2.50101	2.16996	3.00329				149.8	5.20089	3.89542	8.80667
150	2.3477	2.17928	3.0708				150	5.31582	3.91191	9.29091
150.2	2.36898	2.7447	2.85696				150.2	5.48139	3.94217	8.7846
150.4	2.39202	2.48146	2.8127				150.4	7.00531	3.88222	9.21622
150.6	2.41487	2.65522	2.77337				150.6	6.33891	4.40632	9.51672
150.8	2.41539	2.85409	2.65804				150.8	6.07606	3.65819	9.85403
151	2.44912	2.33361	2.96888				151	5.70373	3.60378	9.56218
151.2	2.45003	2.19337	3.1651				151.2	8.41925	3.50495	9.23743
151.4	2.29615	2.27874	3.09641				151.4	7.67721	3.39682	8.65299
151.6	2.34311	2.29025	3.17845				151.6	7.5927	3.59699	8.7303
151.8	2.49525	2.46611	3.28242				151.8	6.58556	3.74916	8.44314
152	2.82422	2.75128	3.50151				152	5.932	3.7153	8.9727
152.2	2.67031	2.76388	3.21323				152.2	6.67903	3.31174	9.07155
152.4	2.32161	2.14716	3.20646				152.4	6.35756	3.41856	9.17668
152.6	2.44521	2.55963	3.13908				152.6	6.89198	3.74595	9.36934
152.8	2.52498	2.33133	3.36795				152.8	6.20341	3.48623	8.87319
153	2.92843	2.163	3.35288				153	6.68965	3.56741	8.7555
153.2	2.91305	2.10458	3.4565				153.2	6.31795	3.38005	7.95551
153.4	2.56526	1.99838	3.66704				153.4	6.10187	3.72439	9.22833
153.6	2.6203	2.0074	3.69037				153.6	6.41639	3.47599	7.8814
153.8	2.71048	2.11111	3.64393				153.8	6.34436	3.49446	7.88666
154	2.55337	2.38386	3.65205				154	6.52134	3.39001	8.61627
154.2	2.52727	2.31357	3.69112				154.2	6.24976	3.59605	8.28104
154.4	2.65199	2.15142	3.65654				154.4	6.62778	3.6176	8.95556
154.6	2.65479	2.10336	3.58058				154.6	6.29686	4.33057	9.73765
154.8	2.75508	1.90448	3.4639				154.8	6.31244	3.13488	8.50472
155	3.09593	1.92133	3.498				155	6.14392	3.43724	9.18441
155.2	2.74136	1.9015	3.4134				155.2	6.36522	3.40092	8.60419
155.4	2.69259	1.97975	3.57539				155.4	6.24389	3.02633	8.41051
155.6	2.78534	2.04561	3.21625				155.6	6.33947	3.04588	7.68917
155.8	2.63687	2.32234	3.34408				155.8	6.23414	3.0745	6.36895
156	2.75805	2.0472	3.50953				156	6.32013	3.19133	8.20752
156.2	2.81189	1.74458	3.56185				156.2	6.0108	2.86203	7.78958
156.4	3.09026	1.80825	3.50795				156.4	5.83185	2.82321	7.79852
156.6	2.89469	1.84133	3.37588				156.6	5.89736	2.64837	7.681
156.8	2.56942	1.86278	3.32177				156.8	5.51224	2.97418	8.40932
157	2.72102	1.78683	3.12517				157	6.04484	3.35945	7.51754
157.2	2.79519	1.9602	3.31028				157.2	6.03438	2.95344	7.98596
157.4	2.93536	1.80138	3.45837				157.4	5.77141	3.46753	7.81987
157.6	2.79842	1.81264	3.65086				157.6	5.71272	3.38346	7.36633
157.8	3.04494	1.85757	3.14645				157.8	6.16649	3.32145	7.11219
158	2.74241	1.87283	3.26368				158	5.98145	3.43456	7.36421
158.2	2.81352	1.87995	3.20836				158.2	5.92271	4.36847	8.27402
158.4	2.78811	1.96555	3.29192				158.4	5.63298	5.01869	9.12028
158.6	3.24441	1.8154	3.54267				158.6	6.3633	4.88343	8.57896
158.8	3.09769	1.76861	3.29061				158.8	6.27991	4.76956	7.89192
159	3.3232	1.80561	3.53536				159	5.21797	4.47796	8.12864
159.2	3.4719	1.94179	3.34272				159.2	6.36008	4.15441	7.9635
159.4	3.10633	1.7779	3.51843				159.4	5.81428	4.10941	7.94722
159.6	3.28093	1.80761	3.52571				159.6	6.25918	4.21796	8.14262
159.8	3.17095	1.93171	3.59352				159.8	5.90857	4.05121	7.52169
160	3.02273	1.93679	3.40863				160	5.89159	4.37118	8.63071
160.2	2.86471	1.86505	3.56598				160.2	6.18127	4.15032	8.38548
160.4	3.08466	1.69086	3.3847				160.4	5.7325	4.52095	8.644
160.6	3.06553	1.91428	3.54532				160.6	6.06363	4.22635	9.46412
160.8	3.36834	1.82267	3.38957				160.8	5.88384	4.43826	8.27652
161	3.17281	1.85592	3.36851				161	5.81436	4.14508	8.47889
161.2	3.27755	1.74785	3.34238				161.2	5.946	4.14195	8.42524
161.4	2.91753	1.78757	3.51342				161.4	5.84298	4.31379	7.46647
161.6	3.15097	1.92646	3.5613				161.6	7.28426	4.69676	7.82599
161.8	3.11775	1.83697	3.35984				161.8	5.86299	4.28457	8.21485
162	3.05106	1.89736	3.49458				162	6.99512	4.14288	8.88198
162.2	3.02433	2.0475	3.51642				162.2	8.06575	4.46905	8.6205
162.4	3.06393	1.9023	3.34848				162.4	7.09401	5.26919	9.25693
162.6	3.00609	1.9398	3.20907				162.6	6.82855	5.00081	8.67946
162.8	3.08892	1.85846	3.40644				162.8	6.57249	5.41235	8.42858
163	3.01557	2.1373	3.29938				163	6.82048	6.13528	8.29103
163.2	3.18494	1.92329	3.18546				163.2	5.75983	6.2277	8.5763
163.4	2.83185	1.84938	3.33181				163.4	6.50877	5.60082	8.97698
163.6	3.04789	1.59866	3.21169				163.6	6.42083	5.75856	8.91434
163.8	3.10843	1.70719	3.37182				163.8	7.2497	5.16879	9.34002
164	3.19008	1.65822	3.33587				164	5.74809	5.35852	9.54047
164.2	3.14277	1.62068	3.4584				164.2	6.68591	5.78383	9.28481
164.4	3.30679	1.70927	3.27082				164.4	6.52794	6.45208	8.49213
164.6	2.95458	1.96956	3.00239				164.6	5.64613	7.10277	8.54093
164.8	2.92717	1.93706	3.25564				164.8	5.57331	7.1631	8.73797
165	2.94294	1.98097	3.19909				165	6.38557	7.12325	8.44815
165.2	3.24506	1.8739	3.1645				165.2	5.38442	6.31473	8.05279
165.4	3.45915	1.88182	3.39121				165.4	5.56269	6.42466	8.80077
165.6	3.3414	1.72679	3.27801				165.6	5.13888	6.07513	8.80294
165.8	3.4351	1.9393	3.32667				165.8	5.40355	6.03809	7.66618
166	3.01461	1.80275	3.15746				166	5.08457	5.66786	8.80818
166.2	2.98956	1.92638	3.21692				166.2	5.44551	5.90245	8.60827
166.4	3.10254	1.87298	3.09825				166.4	5.77875	5.88882	8.82005
166.6	3.09884	1.77834	3.33185				166.6	5.48957	5.81043	9.2183
166.8	3.31941	1.83826	3.60496				166.8	5.69021	6.31183	8.91641
167	3.30815	1.8211	3.12309				167	6.0581	5.58182	8.46839
167.2	3.16815	1.89315	3.32695				167.2	6.78744	6.22739	8.50106
167.4	3.14208	1.91839	3.01808				167.4	6.48031	6.07905	9.13747
167.6	3.20911	2.20395	3.01473				167.6	7.02575	5.93891	8.44816
167.8	3.11225	2.35363	3.08254				167.8	7.01691	5.94971	7.95828
168	3.38223	2.49871	3.33629				168	7.10783	5.12217	8.54534
168.2	3.12049	2.46244	3.19244				168.2	6.26131	5.90123	8.89308
168.4	3.07511	2.1038	3.12106				168.4	7.04927	5.97527	8.10941
168.6	3.37269	2.33685	3.10015				168.6	7.02769	7.62424	8.19884
168.8	3.24828	2.24489	3.20217				168.8	6.71987	6.47809	8.62045
169	2.88428	2.02599	3.29066				169	6.95263	8.61358	8.74697
169.2	2.82357	1.73908	3.26997				169.2	7.3122	7.72099	8.67499
169.4	2.82632	1.87334	3.17423				169.4	6.71722	6.97045	8.27291
169.6	2.62234	1.97297	3.13689				169.6	7.54728	7.22176	8.71412
169.8	2.76565	1.99042	3.28395				169.8	6.65127	6.88901	8.42601
170	2.85035	1.97074	3.26392				170	6.66421	6.902	7.84128
170.2	2.83594	1.96655	3.33059				170.2	6.88299	6.8376	8.28114
170.4	3.02445	1.99957	3.37578				170.4	7.06933	5.928	8.17548
170.6	2.96371	2.13184	3.34095				170.6	7.65188	7.60571	8.63141
170.8	2.95878	1.97932	3.37945				170.8	6.96713	6.77267	7.42569
171	3.11414	2.19634	3.39373				171	6.85161	7.45741	7.4502
171.2	3.13392	2.09306	3.4074				171.2	7.29157	7.97297	6.89634
171.4	3.05266	2.14722	3.19392				171.4	7.49937	6.54191	6.913
171.6	3.27962	2.24036	3.38675				171.6	6.97744	6.57599	6.34982
171.8	3.47337	2.11631	3.22697				171.8	7.07202	6.21738	7.46452
172	3.062	2.05318	3.23678				172	7.13887	5.66493	7.41273
172.2	3.12937	2.19314	3.35205				172.2	7.8083	5.01625	7.66679
172.4	3.34597	1.87311	3.27702				172.4	7.78015	6.20297	7.64385
172.6	3.09354	1.98814	3.26425				172.6	8.05187	5.79961	7.85619
172.8	2.9411	2.38142	3.2589				172.8	7.44284	6.92376	7.97232
173	3.46001	2.20264	3.38037				173	6.56368	6.77966	8.50932
173.2	3.07145	2.17762	3.38941				173.2	6.94564	7.1355	8.10737
173.4	3.45015	2.07814	3.43098				173.4	6.64507	7.77834	8.29875
173.6	3.14625	1.81883	3.33345				173.6	6.41866	7.16155	7.56319
173.8	2.81018	2.08516	3.18554				173.8	5.83994	6.87854	8.18879
174	3.05805	2.38978	3.35248				174	5.64136	7.23116	8.01801
174.2	3.07752	2.06148	3.33027				174.2	5.92126	7.79922	7.85717
174.4	3.06148	2.02117	3.21211				174.4	8.01491	7.13502	7.99772
174.6	2.94794	2.04022	3.12942				174.6	7.33323	7.11781	7.63788
174.8	3.40387	2.09193	3.00902				174.8	7.10213	7.04639	8.43817
175	3.6116	2.20746	3.29779				175	7.43869	6.90644	7.94789
175.2	3.43159	2.0143	3.15944				175.2	7.78924	6.6439	8.30873
175.4	3.15509	2.03258	3.19219				175.4	7.28497	6.96192	8.448
175.6	3.03598	1.87437	3.18597				175.6	7.48632	7.85628	8.61475
175.8	3.14702	1.98507	3.0878				175.8	7.44332	7.90922	7.90825
176	3.11749	1.81808	3.29679				176	7.03376	7.68348	8.55036
176.2	3.10391	1.89322	3.43539				176.2	7.30333	8.44391	8.36635
176.4	3.20829	2.09135	3.20845				176.4	7.32081	8.28711	8.06437
176.6	3.46047	2.10241	3.47061				176.6	7.18136	7.83516	8.46088
176.8	3.22246	2.02672	3.41946				176.8	7.39669	7.07392	8.7436
177	3.4701	2.04372	3.59778				177	7.53016	7.24862	8.13297
177.2	3.26461	1.95578	3.57076				177.2	7.13524	7.29795	8.3936
177.4	3.37068	2.1729	3.666				177.4	6.92724	5.94755	7.84952
177.6	3.2383	2.05755	3.53984				177.6	5.98347	6.81172	7.31604
177.8	3.26603	1.87184	3.39747				177.8	7.17239	5.47356	7.3273
178	3.43549	1.84425	3.38502				178	5.60143	5.60638	7.86333
178.2	3.47163	1.89244	3.58359				178.2	5.96995	5.38024	7.23253
178.4	3.5418	2.00835	3.61045				178.4	5.47565	5.3842	7.42272
178.6	3.34393	1.7652	3.43746				178.6	5.6414	5.29521	6.99242
178.8	3.04133	1.94765	3.49766				178.8	6.60728	5.65143	7.24049
179	2.81426	1.98657	3.57635				179	6.19618	6.36762	8.03752
179.2	3.1339	1.77212	3.4393				179.2	5.6804	6.43929	7.55666
179.4	3.18867	1.75838	3.29482				179.4	5.26273	6.19214	7.58146
179.6	3.34104	1.81633	3.30766				179.6	6.00311	6.38132	7.70863
179.8	3.20745	1.69107	3.39324				179.8	5.12246	5.41214	7.91094
180	3.58095	1.80595	3.51977				180	5.48069	6.22652	8.16014
180.2	3.41836	1.82985	3.38158				180.2	5.45486	6.22967	8.65445
180.4	3.12105	2.08344	3.29673				180.4	5.63516	6.5423	7.77417
180.6	3.05477	2.12666	3.38569				180.6	5.23582	6.74065	7.63013
180.8	3.02967	1.90172	3.29108				180.8	5.27592	6.63195	8.58454
181	3.0092	2.26712	3.32156				181	4.35684	6.42835	8.25532
181.2	3.15179	2.03716	3.24758				181.2	4.7787	6.49472	8.90106
181.4	3.01312	2.04213	3.27147				181.4	4.86972	6.04897	8.28257
181.6	2.8803	2.09653	3.15566				181.6	4.45242	5.56483	7.80835
181.8	3.44016	2.17719	3.30458				181.8	4.78457	5.795	8.42563
182	3.12756	2.1422	3.3026				182	4.73679	6.10048	8.24772
182.2	3.08316	2.21921	3.24418				182.2	5.012	7.47446	7.60107
182.4	3.33618	2.09935	3.4144				182.4	4.92712	6.61056	7.94293
182.6	3.16427	2.31307	3.59515				182.6	4.99907	7.16738	7.73551
182.8	3.17855	2.01708	3.54149				182.8	5.88022	5.80943	7.97401
183	2.79888	2.07963	3.53885				183	6.11915	5.51021	8.1766
183.2	3.19789	1.9475	3.50394				183.2	5.389	5.61593	7.79446
183.4	3.30209	1.91643	3.34829				183.4	5.64915	5.22861	8.36336
183.6	3.47555	1.64075	3.1264				183.6	5.85373	5.2022	8.37436
183.8	3.65525	1.89477	3.28795				183.8	5.72087	5.61668	8.33381
184	3.57981	1.96783	3.33449				184	5.97839	5.44905	8.43986
184.2	3.58714	1.89288	3.27621				184.2	5.90174	6.45205	7.93479
184.4	3.54666	1.83074	3.44173				184.4	6.00458	5.30312	8.04813
184.6	3.49637	1.89293	3.38868				184.6	6.04156	6.52857	8.54499
184.8	3.51026	1.84513	3.30474				184.8	5.95679	7.34691	8.11939
185	4.19133	1.80778	3.51714				185	5.9265	6.45818	8.40721
185.2	3.94211	1.86779	3.48275				185.2	5.86943	7.97754	8.51016
185.4	3.86108	1.8085	3.34861				185.4	5.89329	6.82556	8.46312
185.6	4.17147	1.84537	3.46853				185.6	5.44788	5.97961	8.81243
185.8	3.67202	1.79845	3.37897				185.8	6.16848	6.48211	8.52739
186	3.66631	1.73147	3.17279				186	5.9134	5.90558	8.18778
186.2	3.52526	1.82868	3.28476				186.2	5.06256	7.01228	8.22771
186.4	3.51999	1.67535	3.16759				186.4	5.66766	6.49019	8.335
186.6	3.4766	1.75168	3.29293				186.6	4.87933	6.65004	7.34777
186.8	3.50658	1.82718	3.08602				186.8	6.0792	6.61389	7.40823
187	3.44236	1.79263	3.14756				187	5.92684	6.52334	6.88032
187.2	3.67936	2.04905	3.16948				187.2	5.75419	7.4181	7.15416
187.4	3.59756	1.90533	3.11346				187.4	5.98485	7.09225	7.46044
187.6	3.96705	2.01021	3.15526				187.6	6.05143	6.72218	7.03097
187.8	4.28595	1.83423	3.06635				187.8	5.66538	7.58155	6.78204
188	3.90663	1.82634	2.90905				188	6.22792	8.92971	7.73223
188.2	3.68747	1.9035	3.02801				188.2	6.22477	7.89595	7.08575
188.4	3.93831	1.80308	2.94001				188.4	6.19489	6.87874	7.72097
188.6	3.85462	1.69974	2.90901				188.6	4.67907	5.83738	7.64379
188.8	3.56629	1.61977	2.94799				188.8	4.10236	6.39184	7.60219
189	3.74493	1.65061	3.06085				189	5.75641	6.30456	7.67511
189.2	3.65118	1.68857	2.92364				189.2	5.29882	6.07763	7.76986
189.4	3.46987	1.74373	2.95091				189.4	5.33474	6.23153	8.16405
189.6	3.62141	1.91401	3.27888				189.6	5.41722	6.32677	7.73717
189.8	3.42725	1.76807	3.25637				189.8	5.59945	5.78194	7.34876
190	3.63892	1.83464	2.91556				190	5.74927	6.51256	7.78997
190.2	3.44884	1.78436	2.97774				190.2	5.66061	5.7936	7.65195
190.4	3.64027	1.98047	3.06645				190.4	5.61668	5.72824	7.81274
190.6	3.31023	1.8854	2.8108				190.6	5.83586	5.69757	7.20262
190.8	3.44358	1.97216	2.90621				190.8	5.40225	5.20453	8.41058
191	3.41606	1.95747	2.9077				191	5.39368	4.97741	7.35556
191.2	3.34485	2.02764	2.96679				191.2	5.32148	5.55821	8.55289
191.4	3.4761	2.00866	2.95385				191.4	5.71792	5.23308	8.39792
191.6	3.54368	1.8577	3.00133				191.6	5.28188	5.7798	7.84281
191.8	3.79613	1.89527	2.76022				191.8	5.45849	5.62627	8.42813
192	3.7231	1.89243	3.02615				192	5.22666	5.66182	7.88973
192.2	3.7565	1.93965	2.95124				192.2	5.55088	5.76622	7.63725
192.4	3.7243	1.78366	3.17143				192.4	5.67157	5.68417	7.95505
192.6	3.59683	1.8289	2.9808				192.6	6.24063	5.88401	7.49879
192.8	3.89302	1.91119	3.08878				192.8	5.61038	5.60314	7.53816
193	3.70219	1.72231	3.09631				193	5.66549	5.98262	7.65794
193.2	3.78476	1.89031	2.92453				193.2	5.91186	5.94999	7.39953
193.4	3.72873	1.97095	3.27012				193.4	5.41048	5.52479	7.39932
193.6	3.71535	1.83664	2.75558				193.6	6.0706	5.1317	7.38665
193.8	3.65508	1.86491	3.09425				193.8	5.51259	4.78528	7.06265
194	3.46459	1.95328	3.11903				194	5.60438	5.43491	6.90351
194.2	3.29989	1.8801	3.32745				194.2	6.19135	5.38965	7.70624
194.4	3.3233	1.86543	3.14174				194.4	5.75117	5.33284	7.00908
194.6	3.43972	1.82488	3.68897				194.6	5.39219	5.47964	7.56013
194.8	3.35253	1.81051	3.06122				194.8	5.61885	5.70082	7.005
195	2.88606	1.65331	3.06809				195	5.09719	5.23295	6.38167
195.2	2.89206	1.89592	2.89767				195.2	5.52192	5.90392	6.65182
195.4	3.04984	1.79304	2.93776				195.4	5.64589	4.61177	6.84085
195.6	3.06043	1.86492	3.13803				195.6	4.76735	5.06637	7.16517
195.8	3.3073	1.83365	3.10826				195.8	5.46729	4.86448	7.13223
196	3.17136	1.69692	3.19352				196	5.28893	4.79937	7.39616
196.2	3.41384	1.95805	3.05258				196.2	5.56647	4.55252	7.30215
196.4	3.62801	1.80521	3.10696				196.4	5.60802	4.34081	6.50009
196.6	3.75705	1.88638	2.9923				196.6	4.57475	4.94384	6.81434
196.8	3.48856	1.86532	2.84179				196.8	5.50935	5.10986	6.95178
197	3.24725	2.04448	2.89335				197	5.37039	4.08801	6.98252
197.2	3.61456	2.16298	2.94907				197.2	5.07714	4.20862	7.14647
197.4	3.21747	1.98706	3.0329				197.4	5.16019	5.09303	6.84825
197.6	3.30713	2.22282	3.12482				197.6	5.92058	4.62905	6.83511
197.8	3.01774	2.08448	3.29585				197.8	5.58652	4.74866	7.71844
198	2.87496	2.02361	3.59622				198	5.9823	5.6336	6.97299
198.2	2.8865	2.12719	3.55783				198.2	5.57715	5.60713	7.45943
198.4	3.18193	2.08175	3.24526				198.4	6.16896	5.38044	7.5883
198.6	3.33547	2.0131	3.26182				198.6	5.93023	4.97624	8.43051
198.8	3.41232	1.96378	3.25012				198.8	6.06662	5.85265	8.47085
199	3.16696	1.90797	3.29045				199	5.67152	5.48458	7.27378
199.2	3.20016	1.85655	3.32564				199.2	6.12518	5.48153	7.29862
199.4	3.44957	1.74807	3.12726				199.4	5.68155	5.42554	7.12373
199.6	3.49583	1.64591	3.06529				199.6	5.38218	5.6572	7.90651
199.8	3.49236	1.97085	3.21175				199.8	5.8022	5.49389	8.20715
200	3.20469	2.08268	3.06022				200	5.89346	5.18887	8.01788
200.2	3.44107	1.83644	3.02712				200.2	5.25348	5.48291	7.3249
200.4	3.74427	2.10534	3.20405				200.4	5.49698	5.0985	7.45321
200.6	3.29223	2.12382	2.99201				200.6	5.69773	5.40789	7.35515
200.8	3.66202	2.09053	3.07312				200.8	5.6209	4.71016	6.3538
201	3.14643	1.98125	2.9536				201	5.78301	5.28389	7.10332
201.2	3.36485	2.15366	2.70784				201.2	5.71757	5.02826	6.91753
201.4	3.28523	1.87576	3.29491				201.4	5.1072	5.37486	6.08494
201.6	3.28083	1.91238	3.16152				201.6	6.18159	6.24096	5.69644
201.8	3.08833	1.94719	3.30845				201.8	5.90515	6.08264	5.69789
202	3.02322	2.33454	3.31177				202	5.5729	5.44359	7.23997
202.2	3.10975	1.91209	3.13815				202.2	5.47262	5.00184	7.92627
202.4	3.3939	1.96964	2.81192				202.4	5.33272	5.85352	8.03574
202.6	3.20798	2.00006	2.88312				202.6	5.79939	6.29431	8.38436
202.8	3.03547	1.9812	3.08673				202.8	5.73337	6.38404	8.34182
203	3.32374	1.95218	2.92635				203	5.41924	5.37468	7.94274
203.2	3.3216	1.83413	3.00114				203.2	6.05256	6.49152	8.0926
203.4	3.35931	1.77526	3.11125				203.4	5.63872	6.36671	8.34039
203.6	3.37259	1.94213	3.23388				203.6	5.04457	6.18833	6.78672
203.8	3.36499	1.89747	3.45725				203.8	5.59357	5.89159	7.01603
204	3.21871	1.90879	3.0007				204	5.59708	5.6768	5.9951
204.2	3.18611	1.8826	3.04394				204.2	5.57072	4.96882	5.8978
204.4	3.19593	2.10377	3.0693				204.4	5.46373	4.81749	5.60857
204.6	3.03961	1.90744	3.35953				204.6	6.00214	5.48934	6.65673
204.8	2.83329	2.00244	3.10396				204.8	6.09839	5.04554	5.76458
205	2.91013	1.87618	3.51768				205	5.72357	5.40606	6.65071
205.2	2.96963	2.17692	3.30155				205.2	5.65815	5.21472	6.35401
205.4	2.8295	1.85291	3.11381				205.4	6.34111	5.14536	6.93466
205.6	2.87734	1.84542	3.03606				205.6	6.54017	5.54403	7.09895
205.8	3.01034	1.99676	3.11849				205.8	5.87774	5.93569	6.63887
206	3.01503	1.95914	3.06793				206	5.549	5.7665	6.7375
206.2	2.92319	1.9641	2.86153				206.2	6.53073	6.18583	6.63761
206.4	2.7263	2.0135	3.26166				206.4	6.531	5.73418	6.82113
206.6	3.05012	1.92502	2.97998				206.6	5.75357	5.67044	7.12909
206.8	3.19863	2.1382	3.27858				206.8	5.99569	5.00941	7.01259
207	3.10979	2.02053	3.1515				207	6.05681	5.36286	7.0093
207.2	2.92485	2.11196	3.19227				207.2	6.1451	5.70929	7.19622
207.4	2.89526	2.02369	2.90417				207.4	7.32478	5.27025	7.62092
207.6	2.91431	1.96604	2.909				207.6	6.43877	6.07381	7.18627
207.8	2.95222	1.99849	3.00384				207.8	6.40008	6.25046	6.92441
208	3.04098	2.03707	2.93642				208	7.12148	6.84606	7.53709
208.2	2.65173	1.97234	2.91657				208.2	6.2179	5.99077	7.25036
208.4	2.78768	1.99106	2.82124				208.4	5.91064	6.48524	7.02398
208.6	2.58957	2.00311	2.90134				208.6	6.3932	5.83046	6.25274
208.8	2.69687	2.03185	2.97687				208.8	6.60709	5.63429	6.44486
209	2.84942	1.93511	3.10958				209	6.30995	5.98757	6.54453
209.2	2.98838	1.86481	3.17791				209.2	6.60436	6.13309	6.18082
209.4	3.08591	1.864	3.17953				209.4	6.03025	5.66822	7.19794
209.6	3.31555	1.90929	3.15925				209.6	6.59103	6.23927	5.54288
209.8	3.60322	1.93561	3.25636				209.8	6.49632	6.4841	5.36974
210	3.42123	2.15041	3.03031				210	5.93057	6.33897	5.64649
210.2	3.39106	2.04341	3.19776				210.2	6.52741	6.16876	5.98217
210.4	3.2058	2.00879	2.909				210.4	6.57834	5.52082	4.88194
210.6	3.26159	1.84141	3.10972				210.6	6.69698	5.97545	5.01819
210.8	3.3596	1.81407	2.98504				210.8	6.65522	5.33894	5.41035
211	3.02382	1.84417	3.11228				211	6.95993	5.10829	5.62832
211.2	3.09185	1.78327	3.12964				211.2	8.29437	5.35352	5.38993
211.4	3.08126	1.90628	2.96549				211.4	7.44945	5.63371	5.96373
211.6	2.99958	1.98325	2.97076				211.6	8.35234	5.36274	6.04159
211.8	2.86803	1.93588	3.20114				211.8	6.75826	5.48871	5.88698
212	2.96937	2.01234	2.96831				212	6.42679	5.44116	6.22014
212.2	2.98969	2.07749	2.89863				212.2	6.83749	5.38483	5.75764
212.4	2.91678	2.01712	2.80976				212.4	7.21518	5.90963	5.88035
212.6	2.9998	1.94353	2.72602				212.6	6.88053	5.53464	5.70462
212.8	3.24983	1.83945	3.10529				212.8	6.31597	5.78957	6.27944
213	3.2258	1.67955	2.86747				213	6.81108	5.31519	5.61538
213.2	3.00154	1.87664	2.99524				213.2	6.38726	5.48006	5.97986
213.4	2.99606	1.8643	3.03172				213.4	6.56904	4.91217	5.5782
213.6	3.10651	1.80965	2.99433				213.6	6.72715	4.91413	5.67057
213.8	3.22521	1.81594	2.97339				213.8	6.45486	4.87414	5.87377
214	2.89218	1.71546	2.99522				214	6.50141	5.40298	5.20927
214.2	3.09546	1.87987	2.91018				214.2	7.2804	5.01966	6.27439
214.4	3.13672	1.94321	2.76169				214.4	6.58277	4.73155	5.58799
214.6	3.01833	1.97307	2.95045				214.6	6.47921	4.94402	5.91536
214.8	3.08549	1.95473	2.84053				214.8	6.71395	4.87047	5.74074
215	2.84883	1.92492	3.02826				215	7.14336	4.7127	5.81069
215.2	3.11229	1.87235	3.10429				215.2	7.64334	5.18179	5.34983
215.4	3.29331	2.08381	2.97886				215.4	7.49099	5.00589	5.9618
215.6	3.24055	2.17645	2.93601				215.6	6.85282	4.62534	7.07937
215.8	3.41462	2.00425	2.93117				215.8	6.72365	5.10423	5.84424
216	3.15849	2.01798	2.95355				216	6.21343	4.97637	6.09075
216.2	3.07677	1.96245	3.08697				216.2	6.00304	4.80348	5.67591
216.4	2.75874	2.19794	3.21252				216.4	5.86113	5.35534	5.80798
216.6	2.82197	2.12598	3.12098				216.6	6.36198	5.04637	5.68303
216.8	3.00361	1.88999	3.15098				216.8	6.64322	4.66276	5.54935
217	2.76835	1.88142	3.13766				217	6.86774	5.0315	5.73432
217.2	2.97598	2.14832	3.08327				217.2	6.40235	5.42877	5.62815
217.4	2.74398	1.95161	3.08373				217.4	6.38795	5.35096	5.40471
217.6	2.67016	1.99485	3.01338				217.6	6.12117	5.38222	5.67002
217.8	2.83339	2.14235	2.9776				217.8	7.02046	4.9111	5.82728
218	2.88154	2.03167	2.90807				218	6.05577	4.89629	6.35174
218.2	3.00733	1.92945	2.90458				218.2	5.94871	4.99533	6.94079
218.4	3.24572	1.87391	2.90736				218.4	5.79067	5.09691	5.73268
218.6	3.62646	1.89187	2.84926				218.6	5.54332	5.41088	5.66315
218.8	3.50223	1.91456	2.82917				218.8	5.27168	4.97255	5.65044
219	3.61877	1.92417	2.86488				219	5.25141	4.35755	5.63064
219.2	3.53582	2.12722	2.95646				219.2	5.33221	4.08781	6.21099
219.4	3.38685	1.86391	3.06297				219.4	5.60851	5.02329	5.82446
219.6	3.46746	1.90434	3.02996				219.6	5.80842	4.92644	6.01425
219.8	3.29476	1.93095	3.49752				219.8	5.71171	4.8327	5.74831
220	3.44064	1.82823	3.26102				220	5.90293	5.02714	6.06409
220.2	3.54518	1.72736	3.22356				220.2	5.36293	4.42563	5.76741
220.4	3.33952	1.93568	3.25454				220.4	5.25505	4.66533	5.92843
220.6	3.38484	1.84149	3.16901				220.6	5.76928	4.64262	5.4447
220.8	3.15409	1.93285	3.18188				220.8	5.62795	4.61804	5.01049
221	3.20713	1.90294	3.30241				221	5.9502	4.72297	5.03026
221.2	3.3718	1.93261	3.07278				221.2	5.88144	4.83089	5.42778
221.4	3.7972	1.98756	3.09722				221.4	5.26828	4.83947	5.68788
221.6	3.62671	1.92538	3.19625				221.6	5.02094	4.78707	5.50027
221.8	3.52396	1.82003	3.03748				221.8	5.12042	4.58895	4.97098
222	3.60706	1.91464	3.04043				222	4.84284	4.83644	6.32233
222.2	3.61296	1.94837	2.95761				222.2	4.65253	4.79614	5.69041
222.4	3.71201	1.91248	2.88725				222.4	5.00028	4.78674	6.50896
222.6	3.69735	1.95568	2.89372				222.6	4.44709	4.27549	5.78656
222.8	3.74128	1.81888	2.90469				222.8	5.20443	4.66325	5.667
223	4.0955	1.88492	3.27217				223	5.43167	4.85574	6.44719
223.2	3.83095	1.87289	3.2764				223.2	4.5478	4.44208	7.05395
223.4	3.81194	1.87632	3.15316				223.4	5.18943	4.80228	6.50671
223.6	3.49748	2.24012	3.15948				223.6	5.0106	4.68627	5.62011
223.8	3.46816	2.20691	3.32258				223.8	5.49684	4.64863	6.46715
224	3.31649	2.0852	3.24441				224	5.1419	4.6388	6.26568
224.2	3.76432	2.25073	3.21203				224.2	4.87162	4.72236	6.8384
224.4	3.57565	2.04193	3.23328				224.4	4.68558	4.46093	6.23407
224.6	3.51592	1.93283	3.29543				224.6	4.61956	5.10123	7.26341
224.8	3.62526	1.95416	3.27463				224.8	5.30991	4.91663	6.66272
225	3.16315	2.18434	3.19269				225	5.84642	4.63342	6.43875
225.2	3.08852	2.03005	3.26809				225.2	4.6824	4.59544	6.9074
225.4	3.39454	1.94042	3.09821				225.4	5.52304	4.75516	7.25334
225.6	3.31669	2.13577	3.12106				225.6	5.1373	4.79569	7.45309
225.8	3.28082	2.03268	3.26847				225.8	5.04104	4.57085	7.52872
226	3.46861	1.98853	3.21084				226	4.7318	4.62456	7.70153
226.2	3.46809	1.85917	3.33645				226.2	5.08647	4.2996	7.29558
226.4	3.3131	1.9245	3.17049				226.4	4.86156	4.56371	6.87013
226.6	3.44687	1.91913	3.31351				226.6	4.52402	4.82204	7.08674
226.8	3.41455	1.90207	3.33139				226.8	4.58394	4.73868	7.20608
227	3.52103	1.81236	3.32934				227	5.24237	4.75201	7.50668
227.2	3.29119	1.91222	3.34621				227.2	4.91303	4.51494	7.34256
227.4	3.70908	1.79431	3.27004				227.4	5.25791	4.48037	7.00854
227.6	3.72312	2.10482	3.37378				227.6	5.80756	4.87869	7.07089
227.8	3.39767	1.84867	3.30978				227.8	5.4524	4.75457	7.68864
228	3.9189	1.8415	3.13308				228	5.41034	4.54277	7.17768
228.2	3.45294	1.82604	3.47858				228.2	5.16227	4.83221	7.20869
228.4	3.31846	1.98098	3.791				228.4	5.28841	4.59607	7.40638
228.6	3.0173	1.98328	3.5395				228.6	4.75451	4.77963	7.44266
228.8	3.1139	1.85933	3.42198				228.8	5.05678	4.36341	7.17579
229	3.10497	1.74656	3.50728				229	4.54837	4.84468	6.7918
229.2	3.17164	1.98643	3.52718				229.2	4.79556	4.63701	7.14616
229.4	3.49758	2.03273	3.57879				229.4	4.81974	4.77631	6.85285
229.6	3.40418	1.8772	3.51414				229.6	4.75937	4.50434	7.27437
229.8	3.6329	1.92394	3.41699				229.8	5.51386	4.38805	7.54115
230	3.27588	1.76367	3.2039				230	5.12516	4.86759	7.31401
230.2	3.57773	1.67963	3.39084				230.2	5.03813	4.51398	7.29098
230.4	3.48306	1.92343	3.57009				230.4	4.75774	5.07079	7.20668
230.6	3.72203	1.69002	3.26526				230.6	4.81535	4.43664	7.46219
230.8	3.6825	1.76283	3.46069				230.8	4.78481	4.58846	7.66034
231	3.87249	1.74064	3.282				231	5.35593	4.64358	7.04047
231.2	3.97482	1.5927	3.53982				231.2	5.00579	4.7526	6.9699
231.4	3.35338	1.77306	3.37406				231.4	5.25811	4.88944	7.68864
231.6	3.49737	1.75019	3.27531				231.6	5.1795	4.85834	6.5413
231.8	3.81369	1.67563	3.11549				231.8	5.16008	5.16457	6.17272
232	3.5328	1.63725	3.03409				232	4.97801	4.84614	6.98729
232.2	3.40985	1.65165	3.40071				232.2	5.0104	4.95982	7.66541
232.4	3.34542	1.73703	3.32512				232.4	5.28172	4.70058	6.94477
232.6	3.20077	1.7002	3.07467				232.6	5.6562	4.84665	6.60874
232.8	2.95571	2.04827	2.94544				232.8	5.83502	4.79139	6.41899
233	3.20752	1.82995	2.88651				233	4.91677	4.73215	7.22419
233.2	3.50929	2.00724	2.78251				233.2	4.99899	4.63118	5.89647
233.4	3.54917	1.9787	2.70093				233.4	4.75251	4.87474	5.94575
233.6	3.30405	1.84355	2.69442				233.6	5.05434	4.83198	6.03247
233.8	3.61242	1.89056	2.84477				233.8	4.81286	4.34406	6.29921
234	3.14162	1.87918	2.87163				234	4.86575	4.2627	5.67117
234.2	3.15573	2.0526	2.79811				234.2	5.29485	4.7969	5.80032
234.4	2.75451	2.28578	2.93165				234.4	5.1971	5.25037	5.79699
234.6	3.0829	2.33294	3.04487				234.6	5.2941	5.06814	6.92384
234.8	3.20325	2.09922	3.05838				234.8	5.63824	4.5793	5.56053
235	3.92086	2.03383	3.08216				235	5.09218	4.82481	5.86032
235.2	3.50329	1.87429	3.3277				235.2	5.11994	4.88837	6.66963
235.4	3.32914	1.59251	3.0181				235.4	4.42205	5.00907	6.92091
235.6	3.56394	1.84776	3.26096				235.6	5.34884	4.63356	6.24954
235.8	3.50239	1.76958	3.24547				235.8	5.22862	4.58438	6.58459
236	3.47435	1.85285	3.12929				236	5.69496	4.5747	5.91881
236.2	3.46187	1.91626	2.8801				236.2	6.86931	4.78691	6.41049
236.4	3.06223	1.8763	3.04455				236.4	5.49392	4.45211	6.8634
236.6	3.10228	1.61386	3.14173				236.6	5.83848	5.65621	7.54221
236.8	3.29207	1.89951	3.12139				236.8	5.08676	4.80376	6.67391
237	2.92895	2.20174	3.37878				237	5.28191	4.81826	7.34179
237.2	3.33827	1.94891	3.4224				237.2	4.98333	4.75768	6.4619
237.4	3.067	1.75649	3.59642				237.4	4.98955	4.97625	6.75992
237.6	3.07429	2.15932	3.50379				237.6	5.29095	4.90066	6.93221
237.8	3.02137	1.95355	3.3617				237.8	4.91712	4.83551	7.34354
238	3.33425	2.01653	3.15433				238	5.06785	5.03039	7.73315
238.2	3.87232	2.14201	3.23529				238.2	4.963	4.75519	6.80992
238.4	3.45925	2.05291	2.90205				238.4	4.27591	4.84794	6.37484
238.6	3.21922	1.86138	2.71156				238.6	4.60446	4.79819	6.96154
238.8	3.06905	2.02815	2.91891				238.8	4.739	4.92941	8.22576
239	2.89095	1.94618	3.43951				239	5.19181	4.87264	6.86106
239.2	3.16414	2.1692	3.47551				239.2	5.08006	5.08926	6.95502
239.4	3.05296	1.90987	3.49369				239.4	4.50176	4.79213	6.32082
239.6	3.42854	1.63041	3.31691				239.6	5.32077	4.68514	5.90924
239.8	3.21842	1.62438	3.13041				239.8	4.49495	4.95215	5.89158
240	3.08884	2.18842	3.09892				240	4.90298	5.21845	6.17623
240.2	2.93892	1.71396	3.252				240.2	4.90619	4.99192	6.80456
240.4	3.46215	1.86738	2.94896				240.4	5.11366	4.64567	6.37843
240.6	2.93006	1.77826	3.24876				240.6	5.13221	4.21481	6.16465
240.8	3.52072	2.16132	3.25644				240.8	4.92645	4.3812	6.36259
241	3.23165	1.85583	3.5658				241	4.37761	4.6379	6.24358
241.2	3.28631	1.86618	3.78158				241.2	5.21623	5.01079	6.12304
241.4	3.27633	1.88643	3.61807				241.4	5.75846	4.59214	6.00362
241.6	3.36961	1.77611	3.18069				241.6	4.85252	4.80426	6.2913
241.8	3.25271	1.86158	3.22621				241.8	5.24239	5.47713	6.51682
242	3.08042	1.80141	3.31495				242	5.45447	5.3458	5.84751
242.2	3.19528	2.08181	3.59324				242.2	4.68436	5.337	5.83332
242.4	3.63314	1.77136	3.41283				242.4	4.61968	5.16864	5.85287
242.6	3.50901	2.0198	3.57256				242.6	5.09252	5.59062	6.34958
242.8	3.13606	2.24176	3.51623				242.8	5.02147	5.35746	6.22977
243	3.2303	2.02822	3.62053				243	4.60584	5.41875	6.33773
243.2	3.49986	2.10759	3.52103				243.2	5.05257	5.28657	6.06848
243.4	3.39669	2.08726	3.29162				243.4	4.72302	5.69832	6.16393
243.6	3.38284	2.17526	3.5494				243.6	4.6723	5.36226	6.26234
243.8	3.23538	1.78974	3.65128				243.8	4.81131	4.73358	6.35321
244	3.56315	1.58084	3.6762				244	5.08861	4.91888	6.12745
244.2	3.311	1.73632	3.74407				244.2	4.25801	4.57685	6.2042
244.4	3.65586	1.81712	3.65106				244.4	4.82954	5.78688	6.4901
244.6	3.37577	1.61598	3.71561				244.6	4.9785	5.42264	6.56277
244.8	3.39341	1.80369	3.75191				244.8	5.53592	5.66567	6.1831
245	3.36159	1.66705	3.83556				245	5.31087	5.03978	5.95978
245.2	2.99376	1.73586	3.92005				245.2	5.5666	5.3532	5.94187
245.4	3.27753	1.98061	3.82188				245.4	5.31713	5.11138	6.28741
245.6	3.64122	1.96724	3.89032				245.6	4.14932	5.4756	6.11887
245.8	3.19982	2.02095	3.68305				245.8	4.88595	5.04722	6.12749
246	3.17861	1.83131	3.57243				246	4.99658	4.60558	5.70151
246.2	3.33913	1.96526	3.59954				246.2	5.24365	5.0887	6.46623
246.4	3.60527	1.90295	3.66198				246.4	4.79399	5.96082	6.08566
246.6	3.0567	1.7641	3.54077				246.6	4.82609	5.65403	6.34836
246.8	3.60484	1.58117	3.52786				246.8	4.61328	5.49356	5.6517
247	3.5705	1.78192	3.60613				247	4.38903	5.1201	5.60162
247.2	3.51597	1.73591	3.54916				247.2	4.7567	5.66156	5.84001
247.4	3.43586	1.63928	3.43928				247.4	5.67875	4.83794	6.54502
247.6	3.37176	1.80167	3.2718				247.6	5.58594	5.53093	6.48461
247.8	3.72933	1.83323	3.05276				247.8	5.4418	5.68555	6.09906
248	3.37151	1.70831	3.39706				248	5.61317	5.12777	6.57765
248.2	3.56104	1.74194	3.90567				248.2	5.61656	5.55205	6.37804
248.4	3.3104	1.67819	3.40176				248.4	5.74147	5.77815	6.13643
248.6	3.51679	1.73598	3.86597				248.6	5.4176	5.66406	6.2607
248.8	3.15077	1.90534	3.6272				248.8	5.5237	5.4967	6.61862
249	3.51546	2.27035	3.66825				249	5.39791	6.16377	6.45832
249.2	3.49698	1.93188	3.74412				249.2	5.4778	4.96064	6.67072
249.4	3.71566	2.00232	3.81801				249.4	5.65876	5.40785	6.04885
249.6	3.93039	1.66825	3.61388				249.6	4.64868	5.69004	6.04691
249.8	3.88644	1.73263	3.42225				249.8	5.10198	5.26895	6.79033
250	3.98985	1.74073	3.63227				250	5.29722	5.16085	6.50979
250.2	3.24399	1.73685	3.99944				250.2	5.49824	5.39503	6.48918
250.4	3.48985	1.81942	3.71584				250.4	5.11624	5.68649	6.52992
250.6	3.66885	1.91659	3.53454				250.6	5.31764	5.28915	6.11103
250.8	3.63935	1.64775	3.46439				250.8	5.10869	5.51349	6.76411
251	3.55453	1.68549	3.62253				251	4.86593	5.73537	6.34624
251.2	4.0276	1.53064	3.33352				251.2	5.58203	5.76267	5.83911
251.4	3.41483	1.86875	3.06371				251.4	4.91247	5.44554	5.83793
251.6	3.3857	1.70573	3.35966				251.6	5.16907	4.99209	5.85665
251.8	3.52995	1.78468	3.14369				251.8	5.51113	5.00796	6.15494
252	3.68449	1.69351	3.40588				252	5.04712	5.32821	6.26255
252.2	3.77787	1.71671	3.74071				252.2	5.11309	5.30309	5.85426
252.4	4.03956	1.72948	3.35698				252.4	5.32654	5.32696	6.07995
252.6	3.52918	1.91794	3.46902				252.6	5.26622	5.48136	5.80136
252.8	3.92844	1.63039	3.37079				252.8	5.33251	4.87394	6.25102
253	3.78684	1.8825	3.35839				253	5.60201	5.33448	6.29662
253.2	3.77998	1.85346	3.33625				253.2	5.35985	5.15525	6.32862
253.4	3.83268	2.092	3.22959				253.4	4.87159	5.39778	5.95124
253.6	3.54353	1.9348	3.26679				253.6	5.68597	5.24063	6.53916
253.8	3.65454	1.67644	3.12				253.8	5.60521	5.29952	6.213
254	3.7734	1.91784	3.26497				254	5.94598	5.41465	6.45333
254.2	4.05097	1.8967	3.20283				254.2	5.22302	4.86033	6.2117
254.4	3.78947	1.94101	3.2058				254.4	5.00968	5.16683	6.04608
254.6	3.81113	1.89495	3.16298				254.6	4.78105	5.14776	5.97107
254.8	3.80435	1.93848	3.45312				254.8	5.30315	5.63298	5.79875
255	3.8406	1.74217	3.20316				255	5.77703	4.8926	5.63599
255.2	3.79841	1.85029	3.10259				255.2	5.2224	4.29692	5.62001
255.4	3.98999	1.72451	3.15276				255.4	5.56048	4.04456	6.02022
255.6	3.69306	1.84055	3.04326				255.6	5.06952	4.42264	5.94747
255.8	3.81738	1.69848	3.03533				255.8	5.01067	4.38283	6.04929
256	3.85127	1.71498	3.20184				256	5.31253	4.53575	5.91022
256.2	3.80832	1.63869	2.98516				256.2	4.88012	4.25105	5.69136
256.4	4.22334	1.89747	3.178				256.4	4.89794	4.31346	5.5785
256.6	4.08958	1.98029	3.17558				256.6	5.37156	5.02782	5.8741
256.8	4.22133	1.76534	3.22335				256.8	5.33637	4.8427	5.82297
257	4.3423	1.78777	3.17686				257	5.17153	4.37722	5.93936
257.2	3.79549	1.79339	3.18881				257.2	5.47997	3.75392	5.9584
257.4	4.11123	1.70182	3.1049				257.4	5.87356	4.04085	5.84507
257.6	4.07106	1.824	3.42649				257.6	5.7599	3.94646	6.11568
257.8	4.13253	1.80554	3.05292				257.8	5.66438	3.87055	5.74271
258	3.94889	1.76641	2.89759				258	5.79192	4.23936	5.47825
258.2	3.99698	1.68314	3.00194				258.2	6.067	4.34533	5.71896
258.4	3.34739	1.83938	2.76243				258.4	5.7867	4.26501	5.9264
258.6	3.77549	1.83896	2.93697				258.6	6.2587	4.11568	5.72259
258.8	3.37227	1.98234	2.66204				258.8	5.71485	4.10434	6.39803
259	3.74498	1.80091	2.74004				259	6.50324	4.4079	6.44802
259.2	3.45684	1.8523	2.76101				259.2	6.13552	4.24185	6.23972
259.4	3.31246	1.74921	2.77116				259.4	5.95961	3.95696	6.24092
259.6	3.66853	1.71388	3.11626				259.6	6.1465	3.8684	5.83946
259.8	3.50092	1.91953	3.10229				259.8	5.70194	4.21521	6.36584
260	3.88083	1.87648	3.1328				260	6.54542	4.51577	5.74077
260.2	4.04156	1.88893	3.14323				260.2	6.17272	4.27702	5.65042
260.4	3.75147	1.83846	2.91154				260.4	5.90864	4.26439	5.44436
260.6	3.90113	1.78431	2.98656				260.6	5.81467	4.0811	6.21345
260.8	3.72278	1.68316	3.00287				260.8	5.64088	3.92731	6.01415
261	3.69611	2.03077	3.19591				261	5.95758	4.66404	5.62831
261.2	3.62465	1.88445	3.08804				261.2	6.02935	4.3412	5.60246
261.4	3.51495	1.80938	3.0177				261.4	6.09045	4.30457	5.80438
261.6	3.55494	1.64893	3.12088				261.6	6.28935	4.17221	5.99159
261.8	4.01029	1.71742	3.27115				261.8	5.43665	4.32478	6.13671
262	3.86299	1.74879	3.30041				262	5.2717	3.96027	5.67923
262.2	3.50259	1.92093	3.22039				262.2	5.62165	4.0638	5.76947
262.4	3.54192	1.67766	3.28754				262.4	5.82555	4.23638	6.02424
262.6	3.75008	1.95536	3.66526				262.6	5.69035	4.47838	5.84187
262.8	3.77591	1.90929	3.40849				262.8	5.69191	4.21147	5.34751
263	3.80435	1.90078	3.25581				263	5.2904	3.95476	6.09448
263.2	3.50148	1.91315	3.54463				263.2	5.30191	4.18244	6.20758
263.4	3.61882	1.83886	3.57072				263.4	5.80759	3.97483	5.84799
263.6	3.54755	1.76066	3.20714				263.6	5.59621	3.9307	5.84544
263.8	3.65579	1.70848	3.18982				263.8	5.59421	3.88191	5.83687
264	3.57874	1.66165	3.23614				264	5.65026	4.42235	6.23137
264.2	3.52146	1.85769	3.14386				264.2	5.76128	3.89434	6.29432
264.4	3.52977	1.71304	3.5462				264.4	5.70891	4.09296	5.96675
264.6	3.5648	1.91671	3.78336				264.6	5.53154	4.64533	6.37161
264.8	3.28095	1.94469	3.51709				264.8	5.80924	4.85365	6.30092
265	3.46743	2.15744	3.64375				265	5.6893	4.68547	6.08683
265.2	3.74268	1.94008	3.56859				265.2	5.37993	4.79319	6.37706
265.4	3.20173	1.96623	3.93501				265.4	5.50436	4.86781	6.74355
265.6	3.20465	2.12033	3.21415				265.6	5.45289	5.871	6.0799
265.8	3.14725	1.73969	3.53111				265.8	5.67231	5.23339	6.69724
266	3.49808	1.8325	3.28959				266	5.59206	5.45374	6.41466
266.2	3.27242	1.67642	3.34148				266.2	5.80464	5.40451	6.72921
266.4	3.15056	1.80219	3.2518				266.4	6.20064	4.5845	5.92869
266.6	3.89565	1.97957	3.4747				266.6	5.56332	5.35997	6.39208
266.8	3.7734	1.8917	3.41585				266.8	5.52428	5.10604	6.36767
267	3.84758	1.76454	3.4769				267	5.98677	5.07174	6.55111
267.2	4.09048	1.87098	3.45679				267.2	5.19602	4.80366	6.35257
267.4	3.89953	1.8333	3.67774				267.4	5.64252	5.27236	6.62446
267.6	3.29147	1.94754	3.5001				267.6	6.01083	4.96516	6.22233
267.8	3.51937	1.88218	3.45697				267.8	5.64563	4.97225	6.10957
268	3.52804	1.89179	3.23344				268	5.5564	5.08966	6.52411
268.2	3.66297	2.13078	3.36845				268.2	5.93745	4.76868	6.3242
268.4	3.19566	1.93785	3.47772				268.4	5.74028	4.59309	6.07653
268.6	3.27036	1.92481	3.46494				268.6	5.55083	5.02195	5.88187
268.8	3.24101	1.79433	3.23413				268.8	5.70557	4.84449	5.90629
269	3.29913	2.03215	3.20778				269	6.21215	4.81061	6.20747
269.2	3.30951	1.86756	3.13613				269.2	5.97414	5.11453	6.34666
269.4	3.40368	1.85281	3.36905				269.4	5.90153	5.15467	6.15701
269.6	3.33931	1.88505	3.06082				269.6	6.00057	4.73394	6.15081
269.8	3.3884	1.87648	3.46826				269.8	5.7231	4.48942	6.03988
270	3.20195	2.14232	3.51826				270	5.51204	4.59658	5.96341
270.2	3.07227	1.89297	3.61717				270.2	6.01426	4.60793	5.91637
270.4	2.95499	1.6049	3.40444				270.4	6.60997	4.80455	5.74565
270.6	3.11978	1.7207	3.32611				270.6	5.55229	5.15815	5.82056
270.8	3.01623	1.76707	3.10359				270.8	5.63508	4.92253	5.70169
271	2.8087	1.91557	3.24936				271	6.35015	4.79523	5.69873
271.2	3.088	2.00509	3.2655				271.2	6.12785	5.09818	5.79712
271.4	2.99628	1.68725	3.07893				271.4	6.16425	4.57123	6.09676
271.6	3.29564	1.94018	3.14375				271.6	6.28035	4.65423	5.70516
271.8	3.38189	1.96417	3.13394				271.8	6.16886	4.81911	6.26452
272	3.17588	1.87179	3.13681				272	6.27301	4.72361	5.59988
272.2	3.55288	1.77637	3.2423				272.2	5.50524	4.44696	6.01673
272.4	3.50705	1.8601	3.14006				272.4	5.98324	5.14235	5.54072
272.6	3.55979	1.85262	3.40254				272.6	5.85049	4.45036	5.40759
272.8	3.39047	1.87779	3.19033				272.8	6.10367	4.51577	5.76459
273	3.11965	1.92987	2.76659				273	6.00639	5.23201	5.83114
273.2	3.38773	1.71823	3.06388				273.2	5.79872	5.71026	5.76077
273.4	3.54829	1.96444	3.10437				273.4	6.32832	5.6252	5.56059
273.6	3.28999	2.04952	3.47031				273.6	6.07739	5.42048	5.70318
273.8	3.24401	1.87679	3.2617				273.8	6.08248	5.51071	5.68932
274	3.45961	1.89891	3.31063				274	5.64758	5.15683	5.71999
274.2	3.27242	1.91315	3.38491				274.2	5.69478	5.1613	5.46957
274.4	3.20372	1.69559	3.70772				274.4	6.17204	5.40825	5.72521
274.6	3.4084	1.78587	3.51009				274.6	6.13806	6.33889	5.80473
274.8	3.28749	2.04528	3.30336				274.8	5.91932	5.9555	5.8515
275	3.22699	2.17688	3.26619				275	6.35097	6.35935	5.76441
275.2	3.53583	1.89083	2.98556				275.2	6.00887	6.35054	5.46827
275.4	3.19336	1.72652	3.21682				275.4	5.69326	5.46392	5.9691
275.6	3.16815	1.92585	3.40671				275.6	5.89941	6.29655	5.93671
275.8	3.23676	1.94957	3.43599				275.8	5.94764	6.25507	5.7485
276	3.43172	1.8273	3.39414				276	5.6971	6.52189	5.83779
276.2	3.58348	1.70755	3.41067				276.2	5.7781	6.30783	5.6724
276.4	3.21112	1.87626	3.29787				276.4	5.99277	6.79486	5.648
276.6	3.27099	2.03483	3.51169				276.6	5.96492	6.61837	5.80396
276.8	3.11831	2.00573	3.50167				276.8	6.50444	7.53674	5.79911
277	3.17128	1.79014	3.63286				277	5.71492	6.58864	6.01566
277.2	3.28902	2.03803	3.56787				277.2	6.13031	6.03579	5.66424
277.4	3.51818	1.74787	3.56781				277.4	6.2814	6.39731	5.5622
277.6	3.03401	1.8472	3.49465				277.6	6.02874	6.54364	5.88247
277.8	2.77459	1.80381	3.55426				277.8	5.88354	6.52811	5.91691
278	2.96652	1.88082	3.53622				278	6.22234	6.93034	5.40828
278.2	2.99945	1.7339	3.58237				278.2	5.97972	6.44213	5.65032
278.4	2.87944	1.58218	3.29703				278.4	5.31018	6.61233	6.01235
278.6	3.08807	1.89349	3.64751				278.6	5.38802	6.38967	5.87415
278.8	2.85017	1.59247	3.49986				278.8	5.60077	5.8853	5.8866
279	2.56921	1.9596	3.5447				279	6.01887	6.50773	5.65936
279.2	2.92637	1.63724	3.73558				279.2	7.28204	5.7964	5.65472
279.4	2.9762	1.94098	3.55766				279.4	7.12417	6.44436	5.7081
279.6	3.02897	1.84474	3.87279				279.6	7.28514	6.32489	5.49802
279.8	2.75823	1.87817	3.53744				279.8	7.07931	5.72772	5.56785
280	2.79816	1.89188	3.60484				280	7.44624	6.33718	5.44889
280.2	2.92423	1.71497	3.76229				280.2	7.43718	5.82599	5.59038
280.4	3.24471	1.69151	3.46739				280.4	7.03987	6.53083	5.85354
280.6	3.06058	2.03857	3.43631				280.6	7.10648	5.61217	5.39187
280.8	2.908	1.8738	3.56897				280.8	7.17565	5.36423	5.26122
281	2.92795	2.03152	3.48563				281	7.0198	5.79622	5.31151
281.2	3.29679	1.89533	3.65946				281.2	7.29681	5.58196	5.69502
281.4	2.95701	1.93928	3.5711				281.4	7.51816	6.17863	5.7196
281.6	2.92905	1.90566	3.71937				281.6	7.08607	6.26094	5.64776
281.8	3.29263	1.90655	3.82971				281.8	6.64751	5.83676	5.84157
282	3.11418	1.8113	3.71283				282	7.21247	5.05261	5.6993
282.2	3.21789	1.92374	3.46839				282.2	6.84242	5.2759	5.45984
282.4	2.82486	1.94668	3.51248				282.4	7.00754	5.73437	5.85997
282.6	3.20039	1.92437	3.77534				282.6	7.50358	5.40929	5.57271
282.8	3.45391	2.06862	3.61245				282.8	7.4765	6.35834	5.84874
283	3.16632	2.32018	3.38085				283	7.01797	6.64734	5.95367
283.2	2.87526	2.50346	3.4				283.2	6.97941	7.10085	5.84132
283.4	3.26312	2.23664	3.63868				283.4	6.76908	7.46646	5.35408
283.6	3.17104	2.46023	3.26694				283.6	5.14586	6.63947	5.75368
283.8	3.5104	2.04569	3.42075				283.8	5.74691	6.91826	5.3828
284	3.16088	2.07906	3.36629				284	5.07345	5.93311	5.8641
284.2	2.99929	2.2808	3.66984				284.2	5.4443	5.94943	5.33762
284.4	3.08553	1.78986	3.36614				284.4	5.79554	5.95298	5.53938
284.6	3.12254	1.92829	3.64917				284.6	4.84154	6.41805	5.54932
284.8	3.31927	1.91916	3.43436				284.8	4.76899	6.08353	5.6764
285	3.58297	2.07657	3.22202				285	5.39286	6.53946	5.72639
285.2	3.42756	2.1607	3.34751				285.2	5.24104	6.09811	5.46417
285.4	3.29561	2.11915	3.64381				285.4	4.499	6.41854	5.70854
285.6	3.28132	1.79902	3.56487				285.6	4.7773	6.46071	6.08273
285.8	2.87597	1.84757	3.37905				285.8	4.29339	6.59726	5.88064
286	3.18592	1.96736	3.38796				286	4.47346	6.70931	5.91084
286.2	3.30378	2.03069	3.52196				286.2	5.14395	6.61156	5.56115
286.4	3.21129	2.02532	3.32577				286.4	6.158	7.30923	5.57547
286.6	3.35475	1.97565	3.57926				286.6	5.66258	6.91487	5.62531
286.8	3.18305	2.06592	3.49499				286.8	4.93919	6.89264	5.8385
287	3.48775	2.18698	3.28228				287	4.85421	7.1867	5.63658
287.2	3.65006	2.10459	3.47237				287.2	5.17244	6.523	5.6025
287.4	3.56477	1.94394	3.54592				287.4	5.09104	6.29063	5.72247
287.6	3.44117	2.05398	3.61119				287.6	5.64592	6.51805	5.51989
287.8	3.41493	1.99369	3.37345				287.8	5.4494	6.51915	5.45121
288	3.1994	1.83578	3.64626				288	5.3935	6.8892	5.74191
288.2	3.37669	1.80108	3.7086				288.2	5.06928	6.75658	5.93457
288.4	3.27205	1.88263	3.40299				288.4	5.01888	6.61493	5.81
288.6	3.14765	1.7313	3.52082				288.6	5.53286	6.85058	6.26284
288.8	2.9003	1.69456	3.11854				288.8	5.50626	6.66774	5.84759
289	3.34556	1.89742	3.23528				289	5.76835	6.11143	5.87476
289.2	3.43009	1.83943	2.7912				289.2	4.9103	6.62437	5.86022
289.4	3.19123	1.95823	3.15648				289.4	5.06872	6.41052	5.79151
289.6	3.15535	1.9664	3.04994				289.6	5.0921	6.76531	5.56472
289.8	3.62587	1.93218	3.40668				289.8	4.05102	5.91045	5.60557
290	3.29663	2.1222	3.55981				290	4.59693	6.35091	5.78057
290.2	3.38775	2.07267	3.46991				290.2	4.32096	6.08099	5.57393
290.4	3.24941	2.02869	3.33029				290.4	4.295	6.75419	5.51354
290.6	3.61479	1.91815	3.45888				290.6	4.02919	6.36356	5.25028
290.8	3.36467	1.89251	3.30959				290.8	4.16886	6.43528	5.11787
291	3.38054	1.71113	3.45806				291	4.31512	6.34055	5.19523
291.2	3.31139	1.95403	3.06356				291.2	6.67701	6.42524	5.53858
291.4	3.30991	1.81792	3.34472				291.4	6.96438	6.71652	5.40633
291.6	3.30882	1.95518	3.50074				291.6	7.01971	6.06979	5.381
291.8	3.50839	2.06949	3.14263				291.8	7.58636	5.89231	5.34215
292	3.45438	1.89672	2.89625				292	7.20243	6.60914	5.5868
292.2	3.50617	1.98156	3.22533				292.2	6.89261	6.79654	5.82417
292.4	3.50895	1.94637	3.54099				292.4	6.24275	6.34762	5.70199
292.6	3.51425	1.69402	3.42137				292.6	5.7876	5.70593	5.55869
292.8	3.61207	1.65578	3.48188				292.8	6.63078	6.38444	5.5988
293	3.83833	1.72953	3.59588				293	7.40006	6.34714	5.64638
293.2	3.26056	1.87032	3.61077				293.2	8.64548	6.08879	5.87604
293.4	3.22253	1.87949	3.5102				293.4	7.54758	6.42373	5.9571
293.6	3.0515	1.83101	3.94481				293.6	7.74777	6.46727	6.04623
293.8	2.98445	2.05855	3.29292				293.8	6.61321	6.33909	5.67093
294	3.11162	1.84994	3.48975				294	8.26358	6.93984	5.74284
294.2	3.06448	1.7749	3.37294				294.2	8.0366	6.48585	5.97132
294.4	2.9299	1.78058	3.33389				294.4	6.55317	6.61158	5.80066
294.6	3.02624	1.83073	3.49626				294.6	6.65318	6.81662	6.28526
294.8	2.95346	1.99789	3.72388				294.8	6.77806	6.33312	6.35215
295	3.06574	2.13295	3.47191				295	7.40513	6.50675	6.12784
295.2	3.33092	1.92729	3.73923				295.2	8.29295	6.21811	6.46972
295.4	3.23981	1.92747	3.56527				295.4	6.36475	6.52629	6.76867
295.6	3.30597	2.02146	3.4256				295.6	6.50977	6.45821	6.26522
295.8	3.09503	1.91934	3.52034				295.8	6.98255	6.55542	6.18589
296	3.12129	2.06307	3.86179				296	6.39482	6.50847	6.1359
296.2	3.3125	1.9506	3.52477				296.2	6.87706	6.26951	6.25578
296.4	3.41899	1.82341	3.38332				296.4	6.77439	6.68253	6.10927
296.6	3.46897	1.77907	3.31026				296.6	6.93879	6.74781	6.21629
296.8	3.72021	1.81552	3.62545				296.8	6.73498	6.34108	6.05519
297	3.53561	1.94955	3.28756				297	7.04866	6.57144	5.75989
297.2	3.61738	1.89382	3.50999				297.2	5.85558	6.2692	6.04724
297.4	3.1561	1.9471	3.6502				297.4	6.34442	6.18271	6.01293
297.6	3.12926	2.00802	3.47332				297.6	6.38446	7.00082	5.78016
297.8	3.1922	2.04711	3.57661				297.8	6.52687	6.4774	5.86224
298	2.99554	1.99688	3.50004				298	7.49166	6.50826	5.87394
298.2	3.23642	1.96033	3.44236				298.2	7.29052	6.88596	6.28696
298.4	3.81835	1.94728	3.39177				298.4	7.82587	6.53613	6.30889
298.6	3.34438	2.01051	3.58642				298.6	6.60317	6.18808	6.16898
298.8	2.98129	1.96037	3.38706				298.8	6.89431	6.38563	6.10678
299	3.0594	1.97986	3.62054				299	7.50655	5.97194	5.73813
299.2	3.55659	1.88583	3.54066				299.2	7.89062	6.31537	5.43738
299.4	3.26518	2.05547	3.48305				299.4	7.35316	6.67752	5.68925
299.6	3.20872	1.98824	3.40834				299.6	6.90827	6.62907	5.82752
299.8	3.38313	1.85488	3.59419				299.8	5.88596	6.58812	5.85067
300	3.31952	1.8107	3.47344				300	6.75118	6.52302	5.83513
300.2	2.8856	1.87337	3.30004				300.2	8.21399	6.45036	5.99427
300.4	3.0467	2.01749	3.37257				300.4	7.58237	6.5111	6.13941
300.6	3.30208	1.85688	3.18933				300.6	6.86517	6.48336	6.01871
300.8	3.18977	1.80365	3.46123				300.8	5.08704	6.51225	5.94656
301	3.12865	1.82061	3.5723				301	6.0875	6.31619	6.11062
301.2	3.30855	1.73573	3.54688				301.2	5.36942	5.99541	5.85573
301.4	2.99962	1.76731	3.5791				301.4	5.49517	6.3034	5.52978
301.6	2.96526	2.08433	3.29247				301.6	5.72776	6.74857	5.90686
301.8	3.06122	2.32241	3.48296				301.8	5.95239	7.75537	5.765
302	3.37294	2.17495	3.56412				302	5.18535	6.92004	5.80513
302.2	3.9123	1.96894	3.50786				302.2	5.42973	6.44398	5.86275
302.4	3.84129	2.15759	3.57258				302.4	5.1558	6.48371	6.04103
302.6	3.71783	1.93565	3.58074				302.6	5.44008	6.61313	5.90903
302.8	3.99196	1.72332	3.36303				302.8	5.3834	6.31615	5.54801
303	3.66533	1.91388	3.66228				303	4.83338	7.00063	5.61646
303.2	3.17448	2.06271	3.6848				303.2	5.27523	5.74542	6.08995
303.4	3.34651	1.84264	3.35257				303.4	5.12396	6.20152	6.10965
303.6	3.10437	1.92038	3.58171				303.6	5.53537	6.00288	6.03544
303.8	3.25627	1.68883	3.53815				303.8	5.31653	5.88344	5.83995
304	3.24394	1.84307	3.38477				304	5.15761	5.57408	6.58703
304.2	3.50461	1.85897	3.25535				304.2	4.8824	5.75665	6.08275
304.4	3.4169	1.85456	3.10437				304.4	4.74104	6.08978	5.97592
304.6	3.28025	1.88812	3.45453				304.6	4.91053	5.90833	6.27254
304.8	3.37278	1.93569	3.1185				304.8	5.21993	5.86155	6.22746
305	3.43013	1.88648	3.40016				305	5.98336	5.88016	6.17387
305.2	3.24006	2.1016	3.41838				305.2	5.0218	5.75434	6.1379
305.4	3.48756	1.89914	3.28664				305.4	5.10091	5.59203	6.42364
305.6	3.6381	2.00136	3.34988				305.6	5.28785	6.64228	6.04424
305.8	3.55902	2.02732	3.17627				305.8	5.70535	6.44749	6.23272
306	3.78651	1.95456	3.01825				306	5.38727	6.11171	5.95633
306.2	3.57323	2.03473	3.31213				306.2	4.523	6.28961	6.20938
306.4	3.36922	1.91574	3.07509				306.4	4.97496	6.06124	5.85516
306.6	3.43794	1.80706	3.17049				306.6	5.40535	5.99328	6.2003
306.8	3.52981	1.72461	3.1469				306.8	5.08024	5.85559	5.75901
307	3.32143	1.97735	3.5349				307	4.98437	5.99485	5.91276
307.2	3.42164	1.89466	3.57587				307.2	5.10855	6.59373	5.75351
307.4	3.3549	1.95186	3.62636				307.4	5.46993	5.88986	5.65013
307.6	3.39432	2.01852	3.64631				307.6	5.14684	6.29782	5.89657
307.8	3.55175	1.90817	3.55419				307.8	5.20171	5.94537	6.07335
308	3.70722	1.95718	3.77699				308	5.28019	6.13117	6.11584
308.2	3.63569	1.89312	3.70219				308.2	4.60779	6.01432	5.7625
308.4	3.56847	1.88066	3.72489				308.4	4.8086	6.21195	5.81254
308.6	3.78623	1.70448	3.66158				308.6	4.74555	6.18067	5.75237
308.8	3.81435	1.79441	3.6212				308.8	5.19448	6.15194	6.03847
309	3.98692	1.76678	3.81179				309	4.2887	5.85861	6.22736
309.2	3.63823	1.76262	3.71011				309.2	5.09809	6.03757	5.77571
309.4	3.6755	1.73989	3.45743				309.4	4.54059	6.09022	5.34824
309.6	3.68127	2.01806	3.55176				309.6	5.14283	6.10926	5.60576
309.8	3.77541	1.84186	3.56724				309.8	5.74666	6.34116	5.29706
310	3.60806	1.86956	3.45495				310	4.7259	5.47545	5.71284
310.2	3.44147	1.69998	3.51993				310.2	5.01483	6.05816	5.43857
310.4	3.43596	1.80585	3.33204				310.4	4.7403	6.11945	5.57567
310.6	3.40476	1.76041	3.30819				310.6	5.03307	5.85339	5.59036
310.8	3.19687	1.71388	3.51481				310.8	5.10499	6.47578	5.57444
311	3.27293	1.74183	3.36988				311	5.3298	5.82381	5.72954
311.2	3.11011	1.76147	3.41339				311.2	5.28047	6.62379	5.94311
311.4	3.49454	1.74536	3.43843				311.4	5.9914	6.50843	5.47123
311.6	3.34965	1.7787	3.05142				311.6	5.5641	7.06246	5.71548
311.8	3.47909	1.68724	3.0683				311.8	5.17003	6.73422	5.77186
312	3.5116	1.8269	3.16141				312	4.86444	6.7331	5.5252
312.2	3.23434	1.75303	3.19924				312.2	4.7734	6.47732	6.01346
312.4	3.23037	1.73201	3.45209				312.4	4.91738	6.65075	5.98411
312.6	3.43818	1.91662	3.51758				312.6	4.65462	6.59788	5.89722
312.8	3.59557	1.88108	3.64831				312.8	4.61734	6.49864	6.05715
313	3.59231	1.75746	3.55071				313	4.78397	6.35316	5.96899
313.2	3.76771	1.79465	3.53351				313.2	4.80079	6.73873	5.49833
313.4	3.36811	1.86595	3.61484				313.4	5.07076	6.26317	5.87489
313.6	3.23484	1.82946	3.46049				313.6	4.58677	6.25246	5.69075
313.8	3.84689	1.83433	3.19445				313.8	4.8629	6.31269	5.32388
314	3.34664	1.58331	3.31037				314	4.82478	6.57116	5.70445
314.2	3.5842	1.74374	3.33006				314.2	4.92259	6.58554	5.79853
314.4	3.6304	1.81459	3.24325				314.4	4.66075	6.84566	5.85899
314.6	3.46992	1.6553	3.41516				314.6	5.33352	6.67381	5.46845
314.8	3.53634	1.80892	3.18678				314.8	5.50329	6.84362	6.13289
315	3.65074	1.716	3.18718				315	5.22698	6.56928	5.99032
315.2	3.89504	1.74923	3.34853				315.2	5.76248	6.50519	5.5974
315.4	3.60557	1.71769	3.49504				315.4	5.90777	6.20253	5.67565
315.6	3.58822	1.97957	3.41792				315.6	5.22769	6.79184	5.6494
315.8	3.74587	1.7353	3.33435				315.8	5.04957	6.78285	5.80012
316	3.55067	1.72214	3.48422				316	4.90313	6.79021	5.82865
316.2	3.68979	1.84556	3.29408				316.2	4.68405	6.91469	5.98892
316.4	3.76872	1.77478	3.51705				316.4	4.70488	6.61231	5.56586
316.6	3.70097	1.86909	3.66583				316.6	4.53501	7.06145	5.84745
316.8	3.47316	1.82865	3.4613				316.8	5.06601	6.88404	5.65795
317	3.49299	1.86383	3.334				317	4.89181	6.58337	5.66812
317.2	3.48793	1.90171	3.40682				317.2	5.06506	6.42464	5.53212
317.4	3.37665	1.74872	3.28065				317.4	4.94137	6.49498	5.6479
317.6	3.21093	1.92763	3.35932				317.6	5.06057	5.98655	5.63212
317.8	3.28674	1.86756	3.25781				317.8	4.42415	6.79174	5.81365
318	3.09472	1.7821	3.54348				318	4.59074	6.60329	5.58329
318.2	3.41604	1.71855	3.65884				318.2	4.53801	6.6723	6.01182
318.4	3.51176	1.84897	3.42198				318.4	4.56752	7.15595	5.55339
318.6	3.32975	1.91346	3.41853				318.6	3.83847	7.0837	5.61999
318.8	3.63337	1.69723	3.17362				318.8	4.59688	6.56014	5.34731
319	3.83902	1.8007	3.29972				319	4.69944	6.34612	6.17679
319.2	3.28564	1.67463	3.32404				319.2	4.3779	6.45831	5.71481
319.4	3.44745	1.96323	3.62665				319.4	4.26321	6.45969	5.63395
319.6	3.41016	1.80532	3.58929				319.6	4.66354	6.44488	5.45752
319.8	3.56254	1.77313	3.6863				319.8	5.11463	6.87995	5.74981
320	3.88595	1.9608	3.7667				320	4.33893	6.43619	5.58553
320.2	4.06469	2.11827	3.4577				320.2	5.07293	6.78193	6.05897
320.4	3.86527	1.80955	3.5773				320.4	5.34872	6.44147	5.93961
320.6	3.84915	2.02582	3.53618				320.6	5.11757	6.07037	5.99291
320.8	3.78621	2.06328	3.47064				320.8	5.66888	5.94193	5.81078
321	3.86583	1.93844	3.33497				321	5.37651	6.41586	5.58902
321.2	3.95244	1.75012	3.60429				321.2	5.2972	6.11546	6.17238
321.4	3.42538	1.76317	3.52713				321.4	5.06699	6.1164	5.73412
321.6	3.70636	1.82593	3.40185				321.6	4.25753	5.93019	5.72332
321.8	4.24548	1.71391	3.33019				321.8	4.30448	6.07901	6.02895
322	4.30747	1.88064	3.3494				322	4.60896	5.93473	5.49123
322.2	4.00497	1.98867	2.93327				322.2	4.95086	6.21421	5.62525
322.4	3.46188	1.86882	3.22595				322.4	4.84783	6.0607	5.66169
322.6	3.27302	1.7902	3.546				322.6	4.87553	6.21965	5.68004
322.8	3.35794	1.62785	3.60693				322.8	4.39294	6.27465	5.53674
323	3.42114	1.73053	3.50098				323	5.13507	6.22731	5.42237
323.2	3.94146	1.76456	3.72679				323.2	4.72934	6.51319	5.14082
323.4	3.63691	1.65925	3.39435				323.4	5.23728	6.3248	5.39631
323.6	3.39848	2.00572	3.46723				323.6	4.11282	6.31346	5.3013
323.8	3.37516	1.81369	3.61537				323.8	4.81447	5.74238	5.49026
324	3.75937	1.92577	3.82729				324	4.38122	6.48878	5.08746
324.2	4.00181	1.87723	3.64854				324.2	4.1956	6.66418	5.36395
324.4	3.66354	1.77331	3.47457				324.4	3.96281	6.24129	5.51668
324.6	3.81124	1.74117	3.66391				324.6	4.75869	6.02426	5.49626
324.8	4.11029	1.84775	3.96119				324.8	3.30126	6.32258	5.73867
325	3.92751	1.8733	3.83362				325	3.21249	6.29815	5.67658
325.2	3.68968	2.06003	4.02829				325.2	4.96203	6.49159	5.45628
325.4	4.04491	1.91061	4.0555				325.4	5.39856	6.34753	5.50628
325.6	3.7811	1.97152	3.68148				325.6	5.63343	5.99382	5.84388
325.8	3.54562	2.1758	3.66863				325.8	5.69538	6.43909	5.44534
326	3.67855	2.22178	3.88015				326	5.27561	6.42361	5.76508
326.2	3.96885	2.14218	3.77109				326.2	4.97659	6.25613	5.58695
326.4	3.40968	2.04991	3.90037				326.4	5.35291	5.89115	5.89319
326.6	3.33931	1.99047	3.92538				326.6	5.26723	6.50297	5.48175
326.8	3.30373	1.98846	3.81599				326.8	5.4005	5.6292	6.29693
327	3.32575	1.92825	3.99838				327	5.31914	5.50408	5.66331
327.2	3.64825	1.78946	4.16328				327.2	5.67065	5.4685	5.51632
327.4	3.54831	1.76704	3.73529				327.4	5.3208	6.13347	5.43771
327.6	3.65501	1.85297	3.923				327.6	5.32604	5.50435	5.66961
327.8	3.32365	1.75474	4.17996				327.8	5.67733	5.85961	5.52923
328	3.58872	1.73599	3.95721				328	5.43055	6.02099	5.44445
328.2	3.73991	1.79193	4.14872				328.2	5.32367	5.09329	5.90582
328.4	3.90043	1.68403	4.18801				328.4	5.76476	5.71004	5.67235
328.6	3.72134	1.66155	4.04492				328.6	5.10497	5.33457	5.39709
328.8	3.88522	1.73824	3.8207				328.8	6.30048	6.09491	6.06153
329	4.1068	1.99462	3.70416				329	5.96255	5.93539	6.14411
329.2	3.64687	1.96958	3.89156				329.2	6.3672	6.12489	5.7747
329.4	3.80679	1.85274	3.95574				329.4	5.8882	6.15216	5.42727
329.6	4.09767	1.74958	4.11881				329.6	5.66541	6.06771	5.71494
329.8	3.89612	1.82899	3.72487				329.8	5.87395	6.23516	5.39496
330	3.8174	1.76853	3.88558				330	6.17676	5.9958	5.35762
330.2	4.09291	1.81357	3.6618				330.2	5.33566	6.15012	5.53925
330.4	3.85926	1.82752	3.06461				330.4	5.83101	5.84675	5.55911
330.6	3.84823	1.8264	3.32347				330.6	5.07678	5.88875	5.34095
330.8	4.03796	1.85502	3.62478				330.8	4.02835	6.03013	5.65595
331	4.27825	1.78669	3.50492				331	4.85837	5.86719	5.66258
331.2	4.10392	1.86756	3.50828				331.2	5.39037	5.77114	5.37425
331.4	3.96282	1.94461	3.89344				331.4	4.51378	5.92102	5.69346
331.6	3.83185	1.7442	3.54705				331.6	3.96453	5.66092	5.53696
331.8	3.78075	1.75844	3.24965				331.8	3.92285	6.12341	5.42198
332	3.76584	1.81123	3.58252				332	4.07786	5.46745	5.64623
332.2	3.60355	1.86032	3.6787				332.2	4.38463	5.897	5.6968
332.4	4.00144	2.10808	3.72992				332.4	3.66507	5.69017	5.51461
332.6	3.93769	2.05617	4.09502				332.6	4.4978	5.76765	5.36898
332.8	4.05063	1.94142	3.62915				332.8	4.30034	5.97823	5.25013
333	3.84844	1.89354	3.48073				333	5.05655	5.33937	5.59654
333.2	3.47076	1.94672	3.48514				333.2	5.41023	5.70034	5.67793
333.4	3.853	2.11815	3.54653				333.4	4.28775	5.8132	5.56771
333.6	3.88428	1.89176	3.25595				333.6	4.24041	5.88518	5.61915
333.8	3.65929	1.8389	3.41976				333.8	4.6275	5.87392	5.53777
334	4.03068	1.95724	3.37899				334	4.55918	5.73766	5.42161
334.2	3.70603	2.05221	3.39885				334.2	4.27187	6.18386	5.7359
334.4	3.69251	2.06044	3.36527				334.4	5.56174	5.81463	5.51983
334.6	4.03005	1.81914	2.92548				334.6	4.81966	6.27026	5.59492
334.8	4.0867	1.96963	3.45889				334.8	4.82563	6.17047	5.36665
335	3.86733	1.67569	3.29009				335	4.71711	5.82829	5.86675
335.2	4.05147	2.01719	3.37073				335.2	4.34746	6.27136	5.7994
335.4	3.94394	1.94381	3.53415				335.4	5.27801	6.02428	5.4136
335.6	4.13162	1.86177	3.4078				335.6	5.28857	6.19948	5.33093
335.8	3.87224	1.85989	3.25093				335.8	4.9143	6.08833	5.64047
336	3.67948	1.78535	3.38126				336	4.9531	5.46704	5.47525
336.2	3.90029	2.10535	3.40288				336.2	4.99224	6.12849	5.77715
336.4	4.07165	2.17945	3.05816				336.4	4.86464	5.86871	5.89788
336.6	3.54268	2.03105	3.36441				336.6	4.11609	5.99286	5.982
336.8	3.44224	2.06006	3.50771				336.8	4.80508	5.38528	5.33151
337	3.43959	1.86824	4.07911				337	4.77635	5.52339	5.61559
337.2	3.87878	1.81433	4.18182				337.2	4.95605	5.71801	5.42802
337.4	3.72246	1.80317	4.50858				337.4	4.96112	5.44354	5.40832
337.6	4.08859	2.21803	4.31887				337.6	4.36638	5.80819	5.78501
337.8	3.80366	2.02379	4.06545				337.8	4.36319	5.6921	5.85799
338	4.08613	1.92782	4.19024				338	4.45161	5.94523	5.58936
338.2	4.15993	1.9057	4.1581				338.2	5.2265	5.80918	5.6172
338.4	4.10451	1.94767	4.26242				338.4	5.08842	6.01835	5.78303
338.6	4.04024	1.76705	4.04009				338.6	4.99843	6.27684	5.37849
338.8	4.12712	1.86276	4.01295				338.8	4.67343	5.81166	5.22986
339	4.06916	1.99045	4.06125				339	4.3163	5.63285	5.29043
339.2	3.64932	2.12328	3.92582				339.2	4.314	5.58775	5.55717
339.4	3.60744	2.17723	3.98645				339.4	5.1078	5.54688	5.30937
339.6	3.66281	2.18166	4.00788				339.6	5.07847	5.90656	5.64575
339.8	3.91951	2.38318	3.96339				339.8	5.68242	6.19937	5.25674
340	3.39917	2.01774	3.73284				340	5.90046	6.08656	5.65626
340.2	3.2379	2.26164	4.07937				340.2	4.58684	6.09264	5.69731
340.4	3.482	2.0413	3.62813				340.4	4.42075	6.38835	6.12528
340.6	3.56218	1.97279	3.95782				340.6	4.43013	6.39855	5.72291
340.8	3.4257	2.02525	3.78433				340.8	4.09376	6.43623	5.95868
341	3.45433	1.81918	3.57471				341	4.65288	5.61831	5.24477
341.2	3.47147	1.89091	3.6812				341.2	4.49303	6.51843	5.28744
341.4	3.37844	1.84664	3.66167				341.4	3.94872	5.7318	5.7286
341.6	3.52729	1.78316	3.58376				341.6	4.35981	6.12826	5.52969
341.8	3.63024	1.86932	3.80298				341.8	4.04073	5.97572	5.56801
342	3.48569	2.03023	3.74321				342	4.09041	6.0722	5.43841
342.2	3.35339	1.99272	3.59433				342.2	3.96651	5.82571	5.20405
342.4	2.99216	2.03351	4.02367				342.4	4.10817	6.27139	5.08878
342.6	3.36358	1.95284	3.6928				342.6	4.07696	6.56458	5.31004
342.8	3.09995	2.02694	3.89686				342.8	4.16773	6.21165	5.56451
343	3.29299	1.97824	3.96746				343	4.73733	6.20308	4.84122
343.2	3.44071	1.92769	3.69301				343.2	4.51873	6.05535	5.42457
343.4	3.62214	1.9118	3.81868				343.4	4.82382	6.4715	5.40204
343.6	3.2968	1.95204	3.55068				343.6	4.29016	6.17966	5.30352
343.8	3.1371	2.00614	3.97026				343.8	4.43207	5.98032	5.33214
344	3.39741	2.01868	3.77224				344	4.10263	6.46553	5.62873
344.2	3.38498	2.05218	3.48048				344.2	4.24898	6.57405	5.95739
344.4	3.57316	2.2013	3.7002				344.4	4.24515	6.51034	5.23308
344.6	3.71462	2.10837	3.62445				344.6	4.02549	6.04699	5.51642
344.8	3.43231	2.14214	3.56144				344.8	4.19523	6.33055	5.57702
345	3.78524	2.17166	3.9884				345	4.28764	6.44201	5.3284
345.2	3.60241	2.32978	3.79572				345.2	4.43747	6.72737	5.6007
345.4	3.81644	2.29198	3.60398				345.4	3.87543	5.73781	5.75409
345.6	3.83274	2.40893	3.67467				345.6	4.19923	6.35001	5.73577
345.8	3.79348	2.20196	3.84697				345.8	4.41265	6.33187	5.68067
346	3.69721	2.14278	3.64961				346	4.19859	6.25335	5.54161
346.2	3.63957	2.15127	3.59972				346.2	4.07049	6.28316	5.83861
346.4	3.52452	2.05474	3.82371				346.4	4.12695	6.33985	5.8877
346.6	3.93909	2.04989	3.58526				346.6	4.22607	5.99822	5.40658
346.8	3.95697	2.11001	3.8506				346.8	4.14638	5.92983	5.76776
347	3.92874	2.09395	3.57343				347	4.07027	5.85919	5.56011
347.2	4.23913	1.96242	3.60972				347.2	4.08143	6.84933	5.57018
347.4	4.00691	1.97717	3.50949				347.4	3.88821	6.91716	5.44347
347.6	3.91225	2.13408	3.44752				347.6	4.34666	7.35749	5.33185
347.8	3.9467	2.19542	3.83047				347.8	3.86466	6.4555	5.47066
348	4.03262	2.23476	3.57854				348	4.69933	6.54024	5.23654
348.2	4.10875	2.29019	3.93895				348.2	4.47114	7.07329	5.53145
348.4	4.07692	2.39767	4.01769				348.4	4.11115	7.0507	5.69884
348.6	3.98247	2.27903	4.0048				348.6	4.30429	6.80553	5.45908
348.8	3.41959	2.19438	3.84763				348.8	4.30247	6.95082	5.96137
349	3.34424	2.05207	3.88432				349	4.03968	7.44289	5.55585
349.2	3.1887	2.13726	3.69358				349.2	4.33983	6.71476	5.62536
349.4	3.7504	2.28272	3.87824				349.4	4.548	6.77156	5.63647
349.6	3.64982	2.17961	3.68783				349.6	4.53691	6.29389	5.74212
349.8	3.14532	2.1249	3.73984				349.8	4.4399	6.81182	5.63612
350	3.42243	1.93646	3.59654				350	4.19762	6.67929	5.63512
350.2	3.46608	2.07513	4.01016				350.2	4.48604	6.91314	5.48337
350.4	3.62235	2.12512	3.61066				350.4	4.48654	6.52532	5.65343
350.6	3.80956	2.18653	3.90679				350.6	4.24524	6.65426	5.51917
350.8	3.77853	2.17158	4.12189				350.8	4.51878	6.41694	5.46651
351	2.96512	2.1675	4.15735				351	4.20637	6.9907	5.56232
351.2	2.71867	2.31574	4.24696				351.2	4.50997	6.48275	5.81033
351.4	3.22475	2.35768	4.11979				351.4	4.15627	6.72206	5.52034
351.6	3.46197	2.25776	4.0107				351.6	4.27052	7.65072	6.06851
351.8	3.88972	2.33647	4.2483				351.8	4.25061	6.56881	5.70663
352	3.72179	2.26678	4.11999				352	4.74287	7.00855	5.8209
352.2	3.56367	2.24339	4.10061				352.2	4.23089	7.07757	5.71016
352.4	3.66146	2.311	4.12186				352.4	4.55251	6.63685	5.48571
352.6	3.67222	2.27388	4.1277				352.6	4.6373	6.90718	5.37972
352.8	3.43253	2.25261	3.99771				352.8	4.01183	6.81921	5.64382
353	3.42731	2.25714	3.8948				353	4.18716	6.47945	5.67511
353.2	3.66696	2.05094	3.87378				353.2	4.52054	6.56594	5.13348
353.4	3.64708	2.26015	3.57834				353.4	4.29236	6.73868	5.49806
353.6	3.57139	2.53605	3.6943				353.6	4.22279	7.10228	5.15699
353.8	3.24597	2.52787	3.82069				353.8	4.41988	5.944	5.47264
354	3.2922	2.27103	3.81405				354	4.36711	6.32949	5.85525
354.2	3.34277	2.08517	3.77371				354.2	4.38793	6.16991	5.82935
354.4	3.44106	2.09006	3.81494				354.4	4.34744	6.0345	5.84165
354.6	3.28374	2.19265	3.5817				354.6	4.57366	6.24924	5.55225
354.8	3.42327	1.82304	3.7275				354.8	4.2539	6.83209	5.51971
355	3.53099	1.8459	3.48157				355	4.13241	6.60262	5.51176
355.2	3.86264	2.10423	3.38031				355.2	3.84569	6.78675	5.60024
355.4	3.54904	2.14855	3.1593				355.4	4.07467	7.08335	5.83803
355.6	3.47633	2.0567	2.94766				355.6	4.35	6.75649	5.55145
355.8	3.60277	2.11403	2.92632				355.8	3.95328	7.12979	5.47648
356	3.61192	2.2128	2.71074				356	4.22947	6.90749	5.52092
356.2	3.6076	2.37942	3.07152				356.2	4.10781	6.51753	5.6829
356.4	3.26694	2.17472	3.10253				356.4	4.32326	7.39857	5.86432
356.6	3.72965	2.17247	2.7527				356.6	4.18345	6.6769	5.32302
356.8	3.48482	1.96707	2.96285				356.8	3.93998	7.04998	5.55441
357	3.18109	2.02146	3.02627				357	4.09537	7.00936	5.59579
357.2	3.54271	1.95385	3.14597				357.2	4.07293	6.60207	5.62612
357.4	3.34538	1.93353	2.82396				357.4	4.98953	6.54933	5.74861
357.6	3.58178	1.83745	3.05445				357.6	5.14457	7.28971	6.05429
357.8	3.38133	1.77676	2.7557				357.8	5.44928	7.14586	5.75695
358	3.52637	1.80681	3.03356				358	5.54202	7.37846	6.15286
358.2	3.50765	1.97172	2.9836				358.2	5.82954	6.87518	5.53431
358.4	3.32509	2.17983	3.0861				358.4	5.77886	6.47545	6.01884
358.6	3.5131	2.08429	3.13515				358.6	5.40033	6.90529	5.64666
358.8	3.50709	1.86528	3.50286				358.8	5.55058	6.70812	5.58549
359	3.61431	2.09666	2.73188				359	5.83198	6.52833	5.5976
359.2	3.40199	2.08809	2.98511				359.2	6.02954	6.82805	5.49901
359.4	3.45027	1.89944	3.20459				359.4	6.01972	6.85863	5.78394
359.6	3.26764	2.05277	3.24742				359.6	5.99126	6.58612	6.20632
359.8	3.48442	2.18335	3.21408				359.8	5.7434	6.65758	5.87533
360	3.40774	2.14363	3.2486				360	6.31175	6.50911	5.36027
360.2	3.62129	2.20773	3.0387				360.2	5.90459	6.49902	5.55493
360.4	3.3745	2.13125	3.04287				360.4	5.82801	6.59809	5.52912
360.6	3.22829	2.17026	3.13174				360.6	5.72589	6.73359	5.24281
360.8	2.94445	2.27319	3.12535				360.8	5.40672	6.37431	5.51872
361	3.16146	1.86712	3.06053				361	5.47696	6.18041	5.33519
361.2	3.0636	2.23687	3.31835				361.2	5.46241	6.35998	5.69549
361.4	2.99087	1.98136	3.52833				361.4	6.0525	6.03122	5.41091
361.6	2.84184	2.14449	3.38489				361.6	5.56422	6.59632	5.34826
361.8	3.03704	2.13167	3.29279				361.8	6.19357	6.83295	5.4557
362	3.0006	2.27096	3.29758				362	6.07989	6.8049	5.30202
362.2	2.88753	2.23326	3.09085				362.2	5.83639	6.28561	5.51443
362.4	3.05065	2.08933	3.19168				362.4	5.89596	6.6469	5.82106
362.6	3.06688	2.36047	3.00052				362.6	5.44488	6.60385	5.41033
362.8	3.07664	2.26254	3.24207				362.8	6.34214	6.38394	5.88351
363	3.19541	2.1138	3.62747				363	5.96244	6.32091	5.64537
363.2	3.20955	2.04443	3.59111				363.2	5.93044	6.40901	5.84865
363.4	3.11975	2.09305	3.18672				363.4	6.19529	6.10772	5.7654
363.6	3.21255	2.06792	3.04152				363.6	6.0885	6.33491	5.65177
363.8	3.15398	2.15963	3.00035				363.8	6.45651	6.21572	5.76429
364	2.97197	2.03891	2.79646				364	6.29468	6.11362	5.43746
364.2	3.16564	1.9049	3.1911				364.2	6.05996	6.44937	5.83138
364.4	3.0809	2.11131	3.02894				364.4	6.09749	6.49551	5.84694
364.6	3.05512	1.96981	3.25374				364.6	6.05139	6.28993	5.54837
364.8	3.03135	1.84268	3.17938				364.8	7.21648	6.68817	5.43415
365	3.18444	1.9944	3.14653				365	6.53874	6.79617	5.57779
365.2	3.27187	2.01336	3.40707				365.2	6.3837	6.26256	5.79888
365.4	3.20815	1.89599	3.32089				365.4	6.53265	6.01416	5.88497
365.6	3.41021	1.94062	3.16403				365.6	6.32244	5.99153	5.48834
365.8	3.16867	2.04623	3.3611				365.8	6.48835	6.10607	5.47268
366	3.1976	1.93504	3.22463				366	6.40455	6.11892	5.17991
366.2	3.06287	2.07071	3.11541				366.2	6.27948	6.67541	5.54202
366.4	2.94085	1.9516	3.04513				366.4	6.10925	6.45265	5.91192
366.6	2.87196	1.87115	3.24207				366.6	6.37347	6.23989	5.47613
366.8	2.99482	2.06051	3.56053				366.8	5.91425	6.24474	5.87949
367	2.9545	1.80463	3.51995				367	5.73851	6.4444	5.76821
367.2	3.16722	1.87511	3.8563				367.2	6.74248	6.20383	5.90682
367.4	3.24555	1.98985	3.52695				367.4	6.3437	6.12273	6.02459
367.6	3.13689	1.64881	3.75967				367.6	5.94255	6.52058	5.96694
367.8	3.06806	1.88451	3.4842				367.8	6.33757	6.62625	6.03645
368	2.71509	1.81398	3.73448				368	6.87798	6.35898	6.03124
368.2	3.01365	2.04341	3.50333				368.2	6.21214	6.3637	6.23183
368.4	2.92793	1.95424	3.53367				368.4	6.72725	6.21862	5.62995
368.6	3.13588	2.0893	3.66119				368.6	6.93572	6.48259	5.85237
368.8	3.11937	1.82211	3.87348				368.8	5.78953	6.31436	5.85097
369	3.06656	1.77789	4.05198				369	6.61618	6.13633	6.19424
369.2	2.90908	1.92286	3.80397				369.2	6.89959	6.50098	5.83561
369.4	2.95335	1.80579	3.87878				369.4	6.77134	6.23192	5.73102
369.6	2.97386	1.80105	3.74428				369.6	6.89541	5.89388	5.75883
369.8	2.91119	2.12995	3.55264				369.8	7.18492	6.48624	5.8905
370	2.93066	1.73638	3.67206				370	7.38941	6.6306	5.64815
370.2	2.92026	1.84513	3.4394				370.2	6.69863	6.37189	5.8774
370.4	2.7646	1.84946	3.66516				370.4	6.15581	6.05489	5.81894
370.6	2.62334	2.13277	3.90067				370.6	6.22916	6.13211	5.89583
370.8	2.76258	2.1703	3.57928				370.8	5.88847	6.19774	5.73969
371	2.85108	2.06034	3.66049				371	5.8067	6.45951	6.00174
371.2	2.96613	2.26141	3.57986				371.2	5.77058	6.65908	5.55289
371.4	2.84659	2.04473	3.54229				371.4	6.34775	6.39487	5.77416
371.6	2.88457	2.12897	3.60912				371.6	5.9803	6.30709	5.70292
371.8	2.79423	2.2346	3.70339				371.8	6.62856	6.75645	5.66857
372	2.80638	2.22294	4.17083				372	6.51407	6.50405	5.63439
372.2	3.13574	1.9119	3.67393				372.2	6.02721	6.1646	5.65318
372.4	2.98614	1.98204	3.79205				372.4	6.51365	6.23673	5.46514
372.6	2.87824	1.94923	3.8127				372.6	6.23189	6.43375	5.71436
372.8	3.00041	1.86942	3.79597				372.8	6.00401	6.25319	5.54209
373	2.85289	2.02791	3.61638				373	5.75257	6.67837	5.34722
373.2	3.07734	1.85861	3.79268				373.2	6.77477	6.57512	5.40257
373.4	3.31789	1.90638	3.84901				373.4	6.59899	6.39106	5.38549
373.6	2.96747	2.01998	3.03327				373.6	5.895	6.3104	5.4852
373.8	3.20757	2.02978	3.55329				373.8	7.11312	6.53816	5.51422
374	3.26196	1.81527	3.28066				374	6.43564	6.476	5.52409
374.2	3.32774	1.99256	3.29977				374.2	6.17005	7.1046	5.77355
374.4	3.05521	2.1166	3.41106				374.4	6.58416	7.06642	5.44533
374.6	3.22839	2.01156	3.37357				374.6	5.87319	6.42551	5.49461
374.8	3.21436	2.16467	3.71172				374.8	5.97688	6.06591	5.4947
375	3.30568	1.97813	3.5238				375	5.72255	6.72133	5.43913
375.2	3.12305	1.81384	3.57544				375.2	5.66375	6.42583	5.22081
375.4	3.02769	1.89915	3.30688				375.4	6.3036	6.61163	5.54037
375.6	3.14453	2.05488	3.51037				375.6	5.63608	7.12915	5.84403
375.8	2.99338	2.05223	3.75858				375.8	6.19781	6.98955	5.29949
376	3.34524	2.10891	3.74525				376	6.33728	7.23878	5.44379
376.2	3.10509	1.95457	3.48534				376.2	6.99539	6.48336	4.96545
376.4	3.09389	1.85968	3.51151				376.4	6.22569	7.19888	5.17844
376.6	3.2159	1.93613	3.37376				376.6	6.20681	6.94228	5.86434
376.8	2.95959	2.13951	2.94348				376.8	6.2744	7.04756	5.34688
377	3.12546	1.83354	2.83717				377	5.87519	6.64455	5.49341
377.2	3.04801	1.91058	2.87706				377.2	6.34522	7.17953	5.68693
377.4	3.18713	1.82315	3.09638				377.4	6.07589	6.73346	5.28121
377.6	3.09171	1.88868	3.5				377.6	6.98132	6.63655	5.28589
377.8	3.07139	1.88807	3.01909				377.8	6.33977	7.51702	5.7489
378	3.06114	2.10297	2.68418				378	6.37115	6.81917	5.45268
378.2	3.01832	2.03778	2.78912				378.2	5.94071	7.17929	5.45382
378.4	3.19487	1.95295	2.52586				378.4	6.172	6.60432	5.37598
378.6	3.16092	2.02302	2.95464				378.6	6.33002	6.82105	5.39089
378.8	3.07023	2.05982	2.66557				378.8	6.52368	6.86521	5.22029
379	3.43558	1.70893	2.64133				379	5.59084	7.0439	5.5922
379.2	3.37535	1.79017	2.61122				379.2	6.07145	6.89908	5.38043
379.4	2.96821	1.58989	3.10083				379.4	6.13065	6.76521	5.66844
379.6	2.93492	1.5598	3.25036				379.6	6.80451	6.31438	5.61566
379.8	2.95837	1.76102	2.9908				379.8	6.40907	7.0302	5.55035
380	2.93141	1.82869	2.87858				380	6.72101	6.98994	6.1584
380.2	3.13665	1.85453	2.83608				380.2	7.45296	6.87492	5.22798
380.4	3.11045	1.86589	2.83904				380.4	6.88143	6.88343	5.87647
380.6	3.43482	1.74917	3.07497				380.6	7.49676	6.69498	5.53674
380.8	3.43985	1.76522	3.11092				380.8	7.30174	7.08372	5.64482
381	3.40828	1.83512	3.14238				381	6.24584	7.00637	5.59279
381.2	3.42898	1.77435	2.90052				381.2	6.41322	6.61586	5.3784
381.4	3.08446	1.73166	3.18383				381.4	6.29408	6.72237	5.29858
381.6	3.05502	1.81419	2.85841				381.6	6.87536	6.87797	5.34151
381.8	2.94792	1.7268	2.98397				381.8	6.92546	7.19182	5.56562
382	2.93729	1.7996	3.04632				382	6.57482	7.10774	5.82325
382.2	2.80621	1.89297	3.14961				382.2	6.59777	7.25061	6.11641
382.4	3.01176	1.82615	3.41197				382.4	6.78364	7.32479	5.47533
382.6	3.02802	1.77365	3.24731				382.6	7.76371	6.75501	5.70724
382.8	3.1017	1.73283	3.33876				382.8	7.05629	6.61145	5.90409
383	3.22381	1.86395	3.50288				383	7.47923	6.77379	5.78802
383.2	3.16612	1.84618	3.61389				383.2	7.44457	7.17891	5.42249
383.4	3.44822	1.93011	3.30615				383.4	7.28901	7.39001	5.8032
383.6	3.06191	1.92266	3.7016				383.6	6.86529	6.91155	5.48588
383.8	3.06673	1.75162	3.60523				383.8	7.19835	7.27915	5.2887
384	3.1823	1.98323	3.89852				384	6.68964	7.42767	6.03536
384.2	3.22658	1.65589	3.77461				384.2	6.7188	7.07233	6.0624
384.4	3.14778	1.84293	3.63031				384.4	7.18582	7.17984	5.57099
384.6	3.27192	1.89583	3.43512				384.6	6.04292	6.91565	5.59637
384.8	3.43055	1.77495	3.85591				384.8	6.2869	6.89424	5.69597
385	3.32016	1.73435	3.46083				385	6.1197	7.02871	5.80895
385.2	3.05571	1.67798	3.41675				385.2	4.36072	7.2073	6.00888
385.4	2.96657	1.87168	3.22451				385.4	4.74178	7.19471	5.78865
385.6	2.99544	1.82989	3.39449				385.6	4.56598	6.79179	5.61196
385.8	2.92779	1.93233	3.39712				385.8	4.51565	7.40325	5.79812
386	3.31051	1.76451	3.03603				386	4.63629	6.91143	5.81069
386.2	3.14703	1.88964	3.01384				386.2	4.48095	7.24181	6.21179
386.4	3.36988	1.96241	2.83055				386.4	4.9067	7.11873	6.60648
386.6	3.12529	1.69866	2.78168				386.6	5.15459	6.93997	5.88073
386.8	3.38086	1.93054	2.92964				386.8	5.69378	6.96602	5.71995
387	3.20998	2.11428	3.17247				387	5.71005	6.98248	5.67997
387.2	3.07898	1.9139	2.71446				387.2	5.44716	6.77481	5.62973
387.4	3.04345	1.88362	3.0094				387.4	5.67792	7.11923	5.79173
387.6	2.99763	1.95303	3.32425				387.6	5.38694	6.48716	5.53989
387.8	3.40585	2.06739	3.07644				387.8	6.40028	6.91374	5.25718
388	3.49717	1.96232	3.1694				388	5.95308	7.15417	5.47492
388.2	3.56139	1.93183	3.51093				388.2	5.68797	6.49752	5.34744
388.4	3.44242	2.17298	3.32568				388.4	6.07637	6.99711	5.84492
388.6	3.40096	2.05566	3.51213				388.6	6.26745	7.00385	5.55723
388.8	3.39925	1.90768	3.13276				388.8	6.40834	6.60258	5.39868
389	3.278	2.24793	3.38033				389	6.74072	6.41039	5.72061
389.2	3.03658	2.29336	3.11073				389.2	7.03103	6.12428	5.52749
389.4	3.05992	1.85739	2.58763				389.4	6.61707	6.4746	5.69287
389.6	3.03673	1.90538	2.55755				389.6	6.98704	6.55324	5.8901
389.8	3.10333	1.82131	2.89897				389.8	7.26381	6.11963	5.74262
390	3.23602	1.96929	2.74035				390	6.23619	6.27973	5.8914
390.2	3.20634	1.86349	2.92218				390.2	6.2975	6.34272	6.19392
390.4	3.22253	1.92865	2.98036				390.4	6.37323	6.5342	6.25914
390.6	3.09601	2.01245	3.02315				390.6	6.36974	6.07895	5.53896
390.8	3.43191	2.07057	2.95871				390.8	5.99046	5.83795	5.60348
391	3.41443	2.1782	2.91188				391	6.02053	5.86066	5.36761
391.2	3.22863	2.15225	3.09482				391.2	6.3002	6.15655	5.49371
391.4	3.23719	2.13336	2.85708				391.4	5.9546	6.65393	5.72565
391.6	3.53314	2.02897	2.87819				391.6	6.48489	6.5392	5.70569
391.8	3.22256	2.12184	2.77964				391.8	6.53499	6.99402	5.15471
392	3.23306	1.94545	3.32597				392	5.61407	7.18187	5.46852
392.2	3.25024	2.0663	2.82287				392.2	6.46767	7.01347	5.54146
392.4	3.33046	2.02963	2.57751				392.4	6.43917	6.87127	5.72402
392.6	3.26346	1.91814	2.98602				392.6	6.10362	7.24056	5.49282
392.8	3.34569	1.93304	3.08763				392.8	7.23669	6.92091	5.55397
393	3.21262	2.05446	2.91467				393	6.86538	7.31596	5.57054
393.2	3.35861	1.95533	3.0478				393.2	6.00645	7.19041	5.7595
393.4	3.62515	1.94295	3.29316				393.4	6.17753	7.99253	5.70535
393.6	3.34992	1.92809	3.01832				393.6	6.91547	6.9558	5.58503
393.8	3.23997	1.90208	2.95285				393.8	6.42994	6.7248	5.65016
394	3.38941	1.82189	2.91098				394	6.29371	6.75134	5.41876
394.2	3.35652	1.7875	2.89428				394.2	5.86293	6.70662	5.52481
394.4	3.59921	1.94079	2.69637				394.4	6.19946	7.0797	5.61311
394.6	3.21187	1.81932	2.46126				394.6	6.4579	6.87658	5.76379
394.8	3.21416	1.82123	2.75912				394.8	6.62312	6.72775	5.6319
395	3.2139	1.86917	2.93881				395	6.97328	6.55604	5.51428
395.2	2.994	1.91278	3.07446				395.2	6.32123	6.51525	5.31374
395.4	3.06885	2.01269	3.30612				395.4	6.8951	7.46965	5.7838
395.6	3.20738	1.92159	3.14544				395.6	7.11242	6.96287	6.02684
395.8	3.16954	1.92466	3.33183				395.8	6.44391	6.54624	5.81184
396	2.85068	1.91818	3.25369				396	6.05887	6.69242	5.64105
396.2	3.11571	1.7618	3.33117				396.2	7.03595	6.76607	5.49923
396.4	3.26239	1.66416	3.22998				396.4	6.01937	6.277	5.49268
396.6	3.34396	1.95306	3.57108				396.6	7.64633	6.67535	5.34536
396.8	3.17479	1.85987	3.3673				396.8	5.78101	7.06289	5.31968
397	3.15562	1.89236	3.3246				397	5.92662	6.69914	5.71158
397.2	3.16416	2.04068	3.54556				397.2	6.7922	7.18035	5.21364
397.4	3.20973	1.7584	3.02535				397.4	6.09602	6.48077	5.50979
397.6	3.20409	1.96859	3.61077				397.6	6.10815	6.97042	5.48224
397.8	3.1701	1.91594	3.14618				397.8	6.02936	6.6067	5.23752
398	3.21682	1.87985	3.14103				398	6.31319	6.94129	5.69269
398.2	3.5535	1.85944	3.60585				398.2	6.07176	7.51893	5.81347
398.4	3.36199	1.83352	3.50194				398.4	6.19002	7.36614	5.39387
398.6	2.98988	1.98789	3.39737				398.6	6.34488	7.75082	5.40738
398.8	3.08118	1.85729	3.54024				398.8	6.21939	7.66848	5.7794
399	3.12366	2.11826	3.69515				399	6.8008	7.21615	5.9012
399.2	3.13343	1.97739	3.25581				399.2	6.87419	7.06287	5.71575
[truncated: 504 more rows]
